# Supplementary material for: Kinetic resolution of racemic allylic alcohols via iridium-catalyzed asymmetric hydrogenation: scope, synthetic applications and insight into the origin of selectivity
Source: Royal Society of Chemistry journal article supplement (doi:10.1039/d0sc05276k), 2020-12-10
Supplement: d0sc05276k1.pdf [file d0sc05276k1.pdf]

Supporting Information for:

**Kinetic Resolution of Racemic Allylic Alcohols via Iridium-Catalyzed Asymmetric Hydrogenation: Scope, Synthetic Applications and Insight into the Origin of Selectivity.**

Haibo Wu,<sup>a</sup> Cristiana Margarita,<sup>a</sup> Jira Jongcharoenkamol,<sup>a</sup> Mark D. Nolan,<sup>a</sup> Thishana Singh<sup>b</sup> and Pher G. Andersson<sup>\*ab</sup>

[a] Department of Organic Chemistry, Stockholm University, 106 91, Stockholm, Sweden.

[b] School of Chemistry and Physics, University of Kwazulu-Natal, Private Bag X54001, Durban, 4000, South Africa

(\*pher.andersson@su.se.)

**Contents**

|                                                                                    |      |
|------------------------------------------------------------------------------------|------|
| 1.General methods .....                                                            | S2   |
| 2.General procedure for the synthesis of racemic allylic alcohols .....            | S3   |
| 3.General procedure for kinetic resolution via asymmetric hydrogenation.....       | S9   |
| 4.Double stereodifferentiation and synthesis of ketone <b>3</b> .....              | S19  |
| 5.Asymmetric formal synthesis of inthomycin A and B.....                           | S21  |
| 6.DFT calculation .....                                                            | S26  |
| 7.SFC and GC Chromatograms .....                                                   | S38  |
| 8. <sup>1</sup> H, <sup>13</sup> C and <sup>19</sup> F NMR spectroscopic data..... | S61  |
| 9.References.....                                                                  | S106 |

## 1. General methods

All reactions were conducted under nitrogen atmosphere using magnetic stirring.

CH<sub>2</sub>Cl<sub>2</sub> was freshly distilled using CaH<sub>2</sub> under nitrogen atmosphere. THF was freshly distilled using sodium-benzophenone under nitrogen.

All reagents were used as supplied commercially without further purification. Chromatographic separations were performed on Kiesel gel 60 H silica gel (particle size: 0.063-0.100 mm) or Brockmann I, activated, basic Al<sub>2</sub>O<sub>3</sub> (particle size: ~150 mesh). Thin layer chromatography (TLC) was performed on aluminium plates coated with Kieselgel 60 (0.20 mm, UV254) and visualized under ultraviolet light ( $\lambda = 254$  nm), or by staining with ethanolic phosphomolybdic acid and heating.

<sup>1</sup>H NMR spectra were recorded on a Bruker 400 MHz or 500 MHz at 400/500 MHz in CDCl<sub>3</sub> and referenced internally to the residual CDCl<sub>3</sub> peak (7.26 ppm). <sup>13</sup>C NMR spectra were recorded at 100/125 MHz in CDCl<sub>3</sub> and referenced to the central peak of CDCl<sub>3</sub> (77.0 ppm). Chemical shifts are reported in ppm ( $\delta$  scale).

Enantiomeric excesses were determined by either using SFC on chiral stationary phases with a diode array detector at 210 nm, 230 nm and 254 nm or using GC on chiral stationary phases with a MS detector. (Refer to the individual compounds for specific chromatographic details.) Racemic compounds were used for comparison.

HRMS data were obtained using a Bruker MicroTOF-Q II instrument operation at ambient temperature.

Optical rotations were recorded on an Autopol IV polarimeter from Rudolph Research Analytical, equipped with a sodium lamp (589 nm) and a 10 cm cell.

## 2. General procedure for the synthesis of racemic allylic alcohols

**General Procedure A:** The corresponding Grignard reagent (1.5 eq.) was slowly added to a solution of  $\alpha$ -methyl-cinnamaldehyde (1.0 eq.) in dry THF at  $-78\text{ }^{\circ}\text{C}$ . The reaction was stirred and monitored by TLC. Upon completion, the reaction was quenched with a saturated aqueous  $\text{NH}_4\text{Cl}$  solution, extracted with  $\text{Et}_2\text{O}$ . The combined organic phase was washed with brine and dried over  $\text{Na}_2\text{SO}_4$ . The solvent was evaporated under reduced pressure to afford the crude product, which was then purified by column chromatography on silica gel (Pentane/ $\text{Et}_2\text{O}$  80/20) to give the corresponding product in good to excellent yield.

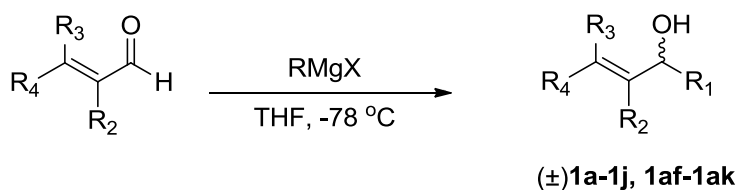

| Substrate | R <sub>1</sub>      | R <sub>2</sub> | R <sub>3</sub> | R <sub>4</sub> | Ref. |
|-----------|---------------------|----------------|----------------|----------------|------|
| (±)-1a    | Me                  | Me             | H              | Ph             | (1)  |
| (±)-1b    | Et                  | Me             | H              | Ph             | (2)  |
| (±)-1c    | <i>n</i> -Bu        | Me             | H              | Ph             | (3)  |
| (±)-1d    | <i>i</i> -Pr        | Me             | H              | Ph             | (3)  |
| (±)-1e    | <i>t</i> -Bu        | Me             | H              | Ph             | (4)  |
| (±)-1f    | Ph                  | Me             | H              | Ph             | (3)  |
| (±)-1g    | Cp                  | Me             | H              | Ph             | New  |
| (±)-1h    | Cy                  | Me             | H              | Ph             | (3)  |
| (±)-1i    | Bn                  | Me             | H              | Ph             | (2)  |
| (±)-1k    | CH <sub>2</sub> TMS | Me             | H              | Ph             | (5)  |
| (±)-1af   | <i>i</i> -Pr        | Et             | H              | Ph             | New  |
| (±)-1ag   | Et                  | H              | Me             | Ph             | (19) |
| (±)-1ah   | Cy                  | H              | Me             | Ph             | New  |
| (±)-1ai   | <i>i</i> -Pr        | H              | Me             | Me             | (20) |
| (±)-1aj   | <i>t</i> -Bu        | H              | Me             | Me             | (20) |
| (±)-1ak   | Cy                  | H              | Me             | Cy             | New  |

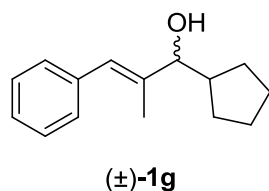

### (*E*)-1-cyclopentyl-2-methyl-3-phenylprop-2-en-1-ol.

Colorless oil.

$^1\text{H}$  NMR (400 MHz,  $\text{CDCl}_3$ )  $\delta$  7.38 – 7.18 (m, 1H), 6.45 (s, 5H), 3.90 (d,  $J$  = 8.8 Hz, 1H), 2.16 (dd,  $J$  = 16.2, 8.3 Hz, 1H), 1.93 – 1.82 (m, 4H), 1.74 – 1.42 (m, 7H), 1.30 – 1.17 (m, 1H).  $^{13}\text{C}$  NMR (101 MHz,  $\text{CDCl}_3$ )  $\delta$  140.23, 137.74, 129.14, 128.24, 126.95, 126.57, 83.54, 43.79, 29.60 (d,  $J$  = 30.4 Hz), 25.76 (d,  $J$  = 11.0 Hz), 13.11. HRMS-ESI;  $m/z$  [ $\text{M}+\text{Na}^+$ ] = 239.1401, calcd. For  $\text{C}_{15}\text{H}_{20}\text{NaO}$ : 239.1406.

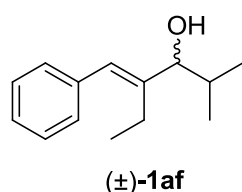

### (*E*)-4-benzylidene-2-methylhexan-3-ol.

Colorless oil.

$^1\text{H}$  NMR (400 MHz,  $\text{CDCl}_3$ )  $\delta$  7.36 – 7.27 (m, 4H), 7.22 (ddd,  $J$  = 6.4, 3.1, 1.5 Hz, 1H), 6.48 (s, 1H), 3.91 (d,  $J$  = 6.4 Hz, 1H), 2.44 – 2.14 (m, 2H), 1.93 (dq,  $J$  = 13.4, 6.7 Hz, 1H), 1.57 (s, 1H), 1.12 (t,  $J$  = 7.6 Hz, 3H), 1.01 (d,  $J$  = 6.6 Hz, 3H), 0.96 (d,  $J$  = 6.8 Hz, 3H).

$^{13}\text{C}$  NMR (101 MHz,  $\text{CDCl}_3$ )  $\delta$  146.02, 137.88, 128.77, 128.35, 126.55, 126.26, 81.99, 31.95, 21.73, 20.11, 17.74, 14.12. HRMS-ESI;  $m/z$   $[\text{M}+\text{Na}^+]$  = 227.3025, calcd. For  $\text{C}_{14}\text{H}_{20}\text{NaO}$ : 227.3027.

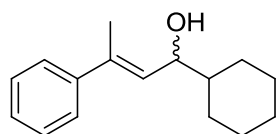

(±)-1ah

**(E)-1-cyclohexyl-3-phenylbut-2-en-1-ol**

Colorless oil.

$^1\text{H}$  NMR (400 MHz,  $\text{CDCl}_3$ )  $\delta$  7.45 – 7.39 (m, 2H), 7.37 – 7.30 (m, 2H), 7.29 – 7.23 (m, 1H), 5.78 (dd,  $J$  = 9.0, 1.3 Hz, 1H), 4.27 (dd,  $J$  = 8.9, 7.1 Hz, 1H), 2.10 (s, 3H), 2.03 – 1.95 (m, 1H), 1.83 – 1.65 (m, 3H), 1.56 – 1.44 (m, 2H), 1.34 – 1.13 (m, 3H), 1.12 – 0.95 (m, 2H).

$^{13}\text{C}$  NMR (101 MHz,  $\text{CDCl}_3$ )  $\delta$  143.30, 137.77, 129.76, 128.38, 127.35, 125.98, 73.39, 44.66, 29.06, 28.78, 26.70, 26.30, 26.17, 16.68. HRMS-ESI;  $m/z$   $[\text{M}+\text{Na}^+]$  = 253.1563, calcd. For  $\text{C}_{16}\text{H}_{22}\text{NaO}$ : 253.1567.

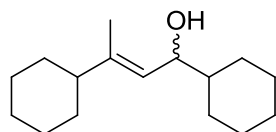

(±)-1ak

**(E)-1,3-dicyclohexylbut-2-en-1-ol**

Colorless oil.

$^1\text{H}$  NMR (400 MHz,  $\text{CDCl}_3$ )  $\delta$  5.15 (d,  $J$  = 9.0 Hz, 1H), 4.07 (dd,  $J$  = 8.8, 7.4 Hz, 1H), 1.97 – 1.88 (m, 1H), 1.88 – 1.64 (m, 9H), 1.63 (s, 3H), 1.40 – 1.07 (m, 11H), 1.03 – 0.82 (m, 2H).  $^{13}\text{C}$  NMR (101 MHz,  $\text{CDCl}_3$ )  $\delta$  144.40, 124.69, 72.91, 47.55, 44.55, 32.07, 31.99, 29.16,

28.71, 26.82, 26.75, 26.48, 26.34, 26.20, 15.31. HRMS-ESI;  $m/z$   $[\text{M}+\text{Na}^+]$  = 259.2032, calcd. For  $\text{C}_{16}\text{H}_{28}\text{NaO}$ : 259.2036.

**General Procedure B:** The suitable aromatic aldehyde (40 mmol) and aliphatic ketone (160 mmol) were dissolved in EtOH (20 mL) under magnetic stirring and aq. NaOH (5 mL, 10%) was added dropwise to the solution. The mixture was stirred at r.t. for 24 h, and then it was poured in ice water (100 mL), neutralized with aq. HCl (1 M) and extracted with EtOAc (3 × 100 mL). The combined organic phase was washed with aq.  $\text{NaHCO}_3$  (100 mL) and brine (100 mL) and dried over anhydrous  $\text{Na}_2\text{SO}_4$ . The solvent was removed under reduced pressure and the crude residue was purified by column chromatography (Pentane/Et $_2$ O, 90/10), affording the pure unsaturated ketone (59-90% yield).

To a solution of enone (10 mmol) in MeOH,  $\text{CeCl}_3 \cdot 7\text{H}_2\text{O}$  (10 mmol, 1 equiv.) was added and cooled in an ice bath. When the  $\text{CeCl}_3 \cdot 7\text{H}_2\text{O}$  was completely dissolved,  $\text{NaBH}_4$  (11 mmol, 1.1 equiv.) was added to the reaction mixture in small portions over 10 minutes. The reaction was allowed to warm up to room temperature. Upon completion (approximately 1 h), the solvent was removed under vacuum. Water was added to the crude reaction mixture and stirred for 20 minutes then extracted with Et $_2$ O. The organic phase was washed with brine and dried over  $\text{Na}_2\text{SO}_4$  and concentrated under vacuum to give the resulting crude which was purified by column chromatography (Pentane/Et $_2$ O, 80/20) to give the corresponding product in good to excellent yield.

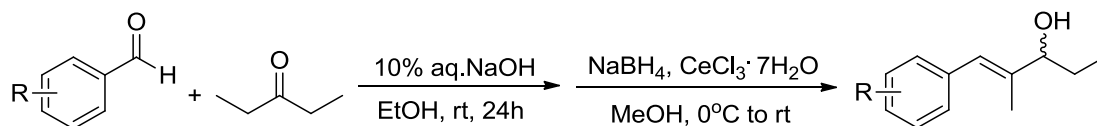

(±)1k-1s

| Substrate | R            | Ref. |
|-----------|--------------|------|
| (±)-1l    | <i>p</i> -Me | New  |



|                |                           |     |
|----------------|---------------------------|-----|
| (±)- <b>1m</b> | <i>p</i> -OMe             | New |
| (±)- <b>1n</b> | <i>p</i> -F               | New |
| (±)- <b>1o</b> | <i>p</i> -Cl              | New |
| (±)- <b>1p</b> | <i>p</i> -Br              | New |
| (±)- <b>1q</b> | <i>m</i> -Me              | New |
| (±)- <b>1r</b> | <i>p</i> -NO <sub>2</sub> | New |
| (±)- <b>1s</b> | 3-thiophene               | New |
| (±)- <b>1t</b> | 2-thiophene               | New |

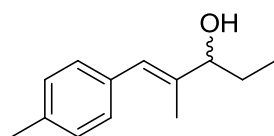

(±)-**1l**

**(E)-2-methyl-1-(p-tolyl)pent-1-en-3-ol.**

Colorless oil.

<sup>1</sup>H NMR (400 MHz, CDCl<sub>3</sub>) δ 7.22 – 7.11 (m, 4H), 6.45 (s, 1H), 4.09 (t, *J* = 6.2 Hz, 1H), 2.35 (s, 3H), 1.86 (d, *J* = 1.4 Hz, 3H), 1.73 – 1.62 (m, 2H), 1.59 (d, *J* = 3.4 Hz, 1H), 0.94 (t, *J* = 7.4 Hz, 3H).

<sup>13</sup>C NMR (101 MHz, CDCl<sub>3</sub>) δ 139.41, 136.24, 134.84, 129.03, 128.96, 126.08, 79.83, 28.08, 21.30, 13.21, 10.25. HRMS-ESI; *m/z* [M+Na<sup>+</sup>] = 213.1244, calcd. For C<sub>13</sub>H<sub>18</sub>NaO: 213.1250.

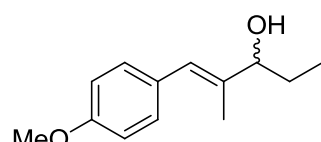

(±)-**1m**

**(E)-1-(4-methoxyphenyl)-2-methylpent-1-en-3-ol.**

Colorless oil.

<sup>1</sup>H NMR (400 MHz, CDCl<sub>3</sub>) δ 7.25 – 7.19 (m, 2H), 6.91 – 6.84 (m, 2H), 6.42 (s, 1H), 4.08 (td, *J* = 6.6, 2.9 Hz, 1H), 3.81 (s, 3H), 1.85 (d, *J* = 1.3 Hz, 3H), 1.73 – 1.61 (m, 2H), 1.58 (d, *J* = 3.6 Hz, 1H), 0.93 (t, *J* = 7.4 Hz, 3H). <sup>13</sup>C NMR (101 MHz, CDCl<sub>3</sub>) δ

158.27, 138.52, 130.33, 130.29, 125.72, 113.70, 79.91, 55.40, 28.09, 13.16, 10.27. HRMS-ESI; *m/z* [M+Na<sup>+</sup>] = 229.1194, calcd. For C<sub>13</sub>H<sub>18</sub>NaO<sub>2</sub>: 229.1199.

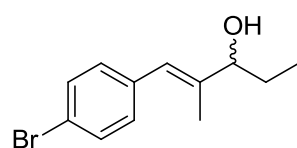

(±)-**1p**

**(E)-1-(4-bromophenyl)-2-methylpent-1-en-3-ol.**

Colorless oil.

<sup>1</sup>H NMR (400 MHz, CDCl<sub>3</sub>) δ 7.48 – 7.40 (m, 2H), 7.19 – 7.09 (m, 2H), 6.42 (s, 1H), 4.09 (dd, *J* = 6.4, 4.9 Hz, 1H), 1.83 (d, *J* = 1.4 Hz, 3H), 1.73 – 1.56 (m, 3H), 0.94 (t, *J* = 7.4 Hz, 3H).

<sup>13</sup>C NMR (101 MHz, CDCl<sub>3</sub>) δ 141.14, 136.66, 131.36, 130.72, 124.87, 120.37, 79.44, 28.12, 13.38, 10.18. HRMS-ESI; *m/z* [M+Na<sup>+</sup>] = 277.0200, calcd. For C<sub>12</sub>H<sub>15</sub>BrNaO: 277.0198.

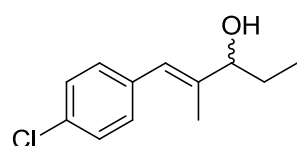

(±)-**1o**

**(E)-1-(4-chlorophenyl)-2-methylpent-1-en-3-ol.**

Colorless oil.

<sup>1</sup>H NMR (400 MHz, CDCl<sub>3</sub>) δ 7.32 – 7.27 (m, 2H), 7.23 – 7.17 (m, 2H), 6.44 (s, 1H), 4.09 (t, *J* = 6.1 Hz, 1H), 1.82 (t, *J* = 5.4 Hz, 3H), 1.71 – 1.56 (m, 3H), 0.94 (t, *J* = 7.4 Hz, 3H). <sup>13</sup>C NMR (101 MHz, CDCl<sub>3</sub>) δ 141.00, 136.20, 132.24, 130.38, 128.41, 124.86, 79.46,

28.13, 13.35, 10.19. HRMS-ESI; *m/z* [M+Na<sup>+</sup>] = 233.0713, calcd. For C<sub>12</sub>H<sub>15</sub>ClNaO: 233.0704.

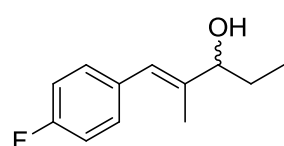

(±)-**1n**

**(E)-1-(4-fluorophenyl)-2-methylpent-1-en-3-ol.**

Colorless oil.

<sup>1</sup>H NMR (400 MHz, CDCl<sub>3</sub>) δ 7.25 – 7.20 (m, 2H), 7.06 – 6.97 (m, 2H), 6.44 (s, 1H), 4.13 – 4.04 (m, 1H), 1.83 (d, *J* = 1.3 Hz, 3H), 1.72 – 1.57 (m, 3H), 0.94 (t, *J* = 7.4 Hz, 3H). <sup>19</sup>F NMR (377 MHz, CDCl<sub>3</sub>) δ -115.86. <sup>13</sup>C NMR (101 MHz, CDCl<sub>3</sub>) δ 161.52 (d, *J* =

245.8 Hz), 140.13, 133.75 (d, *J* = 3.4 Hz), 133.75 (d, *J* = 3.4 Hz), 130.62 (d, *J* = 7.8 Hz), 125.01, 115.12 (d, *J* = 21.3 Hz), 79.55, 28.12, 13.20, 10.21. HRMS-ESI; *m/z* [M+Na<sup>+</sup>] = 217.1010, calcd. For C<sub>12</sub>H<sub>15</sub>FNaO: 217.0999.

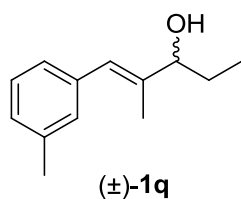

**(E)-2-methyl-1-(m-tolyl)pent-1-en-3-ol.**

Colorless oil.

$^1\text{H}$  NMR (400 MHz,  $\text{CDCl}_3$ )  $\delta$  7.25 – 7.20 (m, 1H), 7.12 – 7.01 (m, 3H), 6.46 (s, 1H), 4.10 (td,  $J$  = 6.6, 2.9 Hz, 1H), 2.36 (s, 3H), 1.86 (d,  $J$  = 1.4 Hz, 3H), 1.72 – 1.63 (m, 2H), 1.59 (d,  $J$  = 3.3 Hz, 1H), 0.95 (t,  $J$  = 7.4 Hz, 3H).  $^{13}\text{C}$  NMR (101 MHz,  $\text{CDCl}_3$ )  $\delta$  139.99, 137.78, 137.70, 129.87, 128.15, 127.33, 126.24, 126.16, 79.76, 28.08, 21.60, 13.24, 10.23. HRMS-ESI;  $m/z$   $[\text{M}+\text{Na}^+]$  = 213.1240, calcd. For  $\text{C}_{13}\text{H}_{18}\text{NaO}$ : 213.1250.

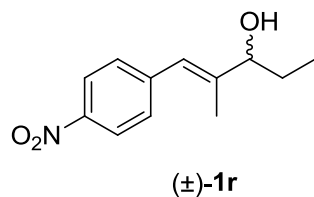

**(E)-2-methyl-1-(4-nitrophenyl)pent-1-en-3-ol.**

Pale yellow oil.

$^1\text{H}$  NMR (400 MHz,  $\text{CDCl}_3$ )  $\delta$  8.21 – 8.14 (m, 2H), 7.42 (dd,  $J$  = 8.9, 2.0 Hz, 2H), 6.56 (s, 1H), 4.14 (dd,  $J$  = 9.7, 6.3 Hz, 1H), 1.89 (d,  $J$  = 1.4 Hz, 3H), 1.78 – 1.60 (m, 3H), 0.97 (t,  $J$  = 7.4 Hz, 3H).  $^{13}\text{C}$  NMR (101 MHz,  $\text{CDCl}_3$ )  $\delta$  146.22, 144.70, 144.65, 129.70, 123.94, 123.64, 79.01, 28.26, 13.98, 10.11. HRMS-ESI;  $m/z$   $[\text{M}+\text{Na}^+]$  = 244.0927, calcd. For  $\text{C}_{12}\text{H}_{15}\text{NNaO}_3$ : 244.0950.

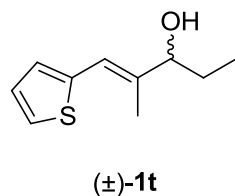

**(E)-2-methyl-1-(p-tolyl)pent-1-en-3-ol.**

Colorless oil.

$^1\text{H}$  NMR (400 MHz,  $\text{CDCl}_3$ )  $\delta$  7.27 – 7.25 (m, 1H), 7.05 – 6.99 (m, 2H), 6.64 (s, 1H), 4.10 (t,  $J$  = 6.5 Hz, 1H), 1.97 (d,  $J$  = 1.2 Hz, 3H), 1.70 – 1.60 (m, 2H), 1.58 (d,  $J$  = 7.4 Hz, 1H), 0.92 (t,  $J$  = 7.4 Hz, 3H).  $^{13}\text{C}$  NMR (101 MHz,  $\text{CDCl}_3$ )  $\delta$  140.86, 138.53, 127.20, 126.96, 125.06, 119.33, 79.65, 28.19, 14.10, 10.21. HRMS-ESI;  $m/z$   $[\text{M}+\text{Na}^+]$  = 205.0649, calcd. For  $\text{C}_{10}\text{H}_{14}\text{NaOS}$ : 205.0658.

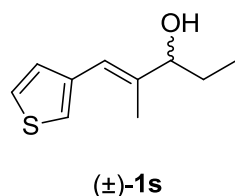

**(E)-2-methyl-1-(thiophen-3-yl)pent-1-en-3-ol.**

Colorless oil.

$^1\text{H}$  NMR (400 MHz,  $\text{CDCl}_3$ )  $\delta$  7.29 (dd,  $J$  = 5.0, 2.9 Hz, 1H), 7.17 (d,  $J$  = 2.8 Hz, 1H), 7.11 (dd,  $J$  = 5.0, 1.2 Hz, 1H), 6.45 (s, 1H), 4.08 (td,  $J$  = 6.6, 3.3 Hz, 1H), 1.90 (d,  $J$  = 1.3 Hz, 3H), 1.70 – 1.61 (m, 2H), 1.58 (br, 1H), 0.96 – 0.89 (m, 3H).  $^{13}\text{C}$  NMR (101 MHz,  $\text{CDCl}_3$ )  $\delta$  139.40, 138.78, 128.94, 124.97, 122.76, 120.39, 79.73, 28.10, 13.78, 10.23. HRMS-ESI;  $m/z$   $[\text{M}+\text{Na}^+]$  = 205.0656, calcd. For  $\text{C}_{10}\text{H}_{14}\text{NaOS}$ : 205.0658.

**General Procedure C:** To a dried round-bottomed flask was added  $\text{CH}_2\text{Cl}_2$  (5 mL), enolate precursor (1.00 mmol, 1 equiv),  $i\text{-Pr}_2\text{NEt}$  (261  $\mu\text{L}$ , 1.50 mmol, 1.5 equiv), aldehyde (1.40 mmol, 1.4 equiv), and TMSOTf (217  $\mu\text{L}$ , 1.20 mmol, 1.2 equiv) at 0  $^\circ\text{C}$ . The reaction was allowed to warm to room temperature and stirred for 24 h, then the mixture was filtered directly through a plug of silica gel (2.0 cm x 5.0 cm) and eluted with  $\text{Et}_2\text{O}$ . The eluent was concentrated in vacuo and the yellow residue analyzed by  $^1\text{H}$  NMR spectroscopy to determine conversion. The unpurified mixture was dissolved in THF (6 mL) and treated with 1.0 N HCl (2 mL). After stirring 1 h, the mixture was diluted with  $\text{Et}_2\text{O}$  (20 mL) and water (20 mL). The layers were separated and the organic layer was washed sequentially with saturated  $\text{NaHCO}_3$  (20 mL) and brine (20 mL). The organic layer was dried over  $\text{Na}_2\text{SO}_4$  or  $\text{MgSO}_4$ , then filtered and concentrated in vacuo. Flash chromatography (5-20%  $\text{EtOAc}$  in pentane) afforded the pure product.

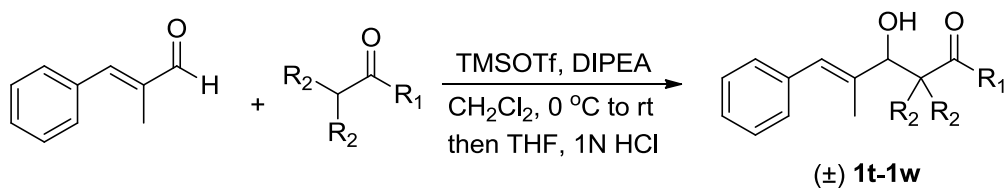

| Substrate      | R <sub>1</sub> | R <sub>2</sub> | Ref. |
|----------------|----------------|----------------|------|
| (±)- <b>1v</b> | OEt            | H              | New  |
| (±)- <b>1w</b> | Ph             | H              | (6)  |
| (±)- <b>1x</b> | Me             | H              | (7)  |
| (±)- <b>1y</b> | OMe            | Me             | (8)  |

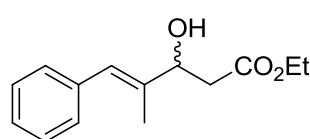

(±)-**1v**

**(E)-ethyl 3-hydroxy-4-methyl-5-phenylpent-4-enoate.**

Colorless oil.

<sup>1</sup>H NMR (400 MHz, CDCl<sub>3</sub>) δ 7.36 – 7.30 (m, 2H), 7.29 – 7.19 (m, 3H), 6.60 (s, 1H), 4.61 (td, *J* = 6.0, 3.7 Hz, 1H), 4.20 (q, *J* = 7.1 Hz, 2H), 3.02 – 2.94 (m, 1H), 2.69 – 2.61 (m, 2H), 1.89 (d, *J* = 1.3 Hz, 3H), 1.29 (t, *J* = 7.1 Hz, 3H). <sup>13</sup>C NMR (101 MHz, CDCl<sub>3</sub>) δ 172.72, 138.26, 137.46, 129.12, 128.26, 126.72, 126.15, 73.71, 61.03, 40.44, 14.36, 13.99. HRMS-ESI; *m/z* [M+Na<sup>+</sup>] = 257.1149, calcd. For C<sub>14</sub>H<sub>18</sub>NaO<sub>3</sub>: 257.1148.

**General Procedure D:** The Grignard reagent (1.5 mmol) was added to a suspension of cerium chloride anhydrous (1.5 mmol) in THF. The mixture was stirred at room temperature for 1 h and cooled to 0 °C. The carbonyl compound (1 mmol) was added with vigorous stirring. After 30 min the reaction mixture was worked up by 10% aqueous AcOH (10 mL). The product was extracted into Et<sub>2</sub>O, and the combined extracts were washed with brine, NaHCO<sub>3</sub> solution and brine and dried with MgSO<sub>4</sub>. The solvent was evaporated and the residue was purified by column chromatography to give the addition product.

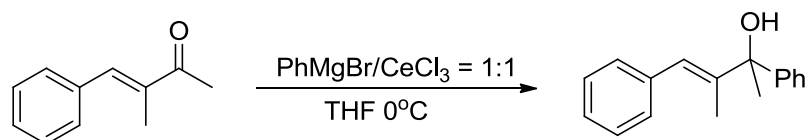

(±) **1u**

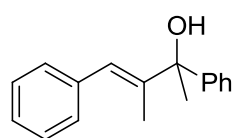

(±)-**1u**

**(E)-3-methyl-2,4-diphenylbut-3-en-2-ol.**

Colorless oil.

<sup>1</sup>H NMR (400 MHz, CDCl<sub>3</sub>) δ 7.54 – 7.47 (m, 2H), 7.39 – 7.20 (m, 8H), 6.86 (s, 1H), 1.95 (d, *J* = 1.5 Hz, 1H), 1.81 (s, 3H), 1.72 (d, *J* = 1.0 Hz, 3H). <sup>13</sup>C NMR (101 MHz, CDCl<sub>3</sub>) δ 146.29, 143.05, 138.17, 129.24, 128.39, 128.23, 127.15, 126.54, 125.62, 124.54, 28.78, 15.15. HRMS-ESI; *m/z* [M+Na<sup>+</sup>] = 261.1257, calcd. For C<sub>17</sub>H<sub>18</sub>NaO: 261.1250.

**General Procedure E:** The corresponding Grignard reagent (1.5 eq.) was slowly added to a solution of cyclohex-1-enecarbaldehyde or 5,6-dihydro-2H-pyran-3-carbaldehyde (1.0 eq.) in dry THF at -78 °C. The reaction was stirred and monitored by TLC. Upon completion, the reaction was quenched with a saturated aqueous NH<sub>4</sub>Cl solution, extracted with Et<sub>2</sub>O. The combined organic phase was washed with

brine and dried over Na<sub>2</sub>SO<sub>4</sub>. The solvent was evaporated under reduced pressure to afford the crude product, which was then purified by column chromatography on silica gel (Pentane/Et<sub>2</sub>O 80/20) to give the corresponding product in good to excellent yield.

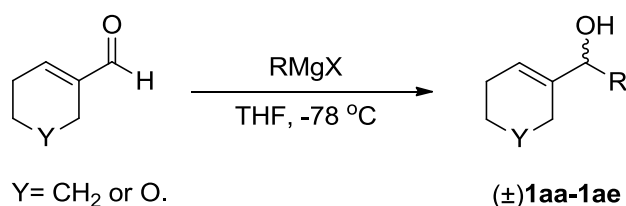

| Substrate | Y               | R            | Ref. |
|-----------|-----------------|--------------|------|
| (±)-1aa   | O               | <i>i</i> -Bu | New  |
| (±)-1ab   | O               | <i>n</i> -Bu | New  |
| (±)-1ac   | CH <sub>2</sub> | Et           | (2)  |
| (±)-1ad   | CH <sub>2</sub> | <i>n</i> -Bu | (16) |
| (±)-1ae   | CH <sub>2</sub> | Cy           | (9)  |

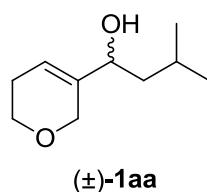

#### 1-(5,6-dihydro-2H-pyran-3-yl)-3-methylbutan-1-ol.

Colorless oil.

<sup>1</sup>H NMR (400 MHz, CDCl<sub>3</sub>) δ 5.79 (s, 1H), 4.26 – 4.05 (m, 3H), 3.80 (dt, *J* = 10.8, 5.3 Hz, 1H), 3.69 (ddd, *J* = 11.3, 6.8, 4.9 Hz, 1H), 2.26 – 2.04 (m, 2H), 1.78 – 1.62 (m, 1H), 1.53 – 1.41 (m, 2H), 1.32 (ddd, *J* = 13.6, 7.8, 5.6 Hz, 1H), 0.92 (d, *J* = 6.6 Hz, 6H). <sup>13</sup>C NMR (101 MHz, CDCl<sub>3</sub>) δ 140.21, 119.99, 72.51, 64.82, 64.56, 44.38, 25.13, 24.89, 23.24, 22.38. HRMS-ESI; *m/z* [M+Na<sup>+</sup>] = 193.1201, calcd. For C<sub>10</sub>H<sub>18</sub>NaO<sub>2</sub>: 193.1204.

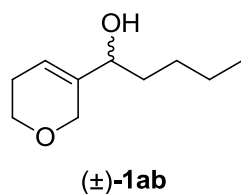

#### 1-(5,6-dihydro-2H-pyran-3-yl)pentan-1-ol.

Colorless oil.

<sup>1</sup>H NMR (400 MHz, CDCl<sub>3</sub>) δ 5.78 (s, 1H), 4.25 – 4.06 (m, 2H), 4.00 (dd, *J* = 10.1, 6.7 Hz, 1H), 3.79 (dt, *J* = 10.8, 5.3 Hz, 1H), 3.70 (ddd, *J* = 11.3, 6.6, 5.0 Hz, 1H), 2.26 – 2.05 (m, 2H), 1.57 – 1.45 (m, 3H), 1.41 – 1.19 (m, 4H), 0.90 (t, *J* = 7.1 Hz, 3H). <sup>13</sup>C NMR (101 MHz, CDCl<sub>3</sub>) δ 139.88, 120.07, 74.33, 64.87, 64.57, 34.99, 28.08, 25.11, 22.72, 14.17. HRMS-ESI; *m/z* [M+Na<sup>+</sup>] = 193.1197, calcd. For C<sub>10</sub>H<sub>18</sub>NaO<sub>2</sub>: 193.1204.

#### Other Substrates:

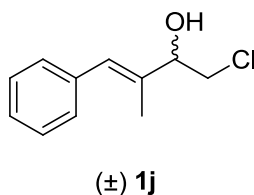

(*E*)-1-chloro-3-methyl-4-phenylbut-3-en-2-ol (±) **1j** was prepared according to a reported procedure and has been previously characterized.<sup>10</sup>

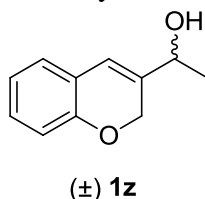

1-(2H-chromen-3-yl)ethanol (±) **1z** was prepared according to a reported procedure and has been previously characterized.<sup>11</sup>

### 3. General procedure for kinetic resolution via asymmetric hydrogenation

A glass vial was charged with 0.2 mmol substrate,  $K_2CO_3$  and catalyst, 1 mL dry toluene was added. The vial was placed in a hydrogenation apparatus and flushed 3 times with nitrogen. The reactor was then purged 8 times using hydrogen, before filling to the required pressure. The reaction was stirred at room temperature for the required time before the hydrogen pressure was released and the solvent was removed under vacuum. Conversions were determined by  $^1H$  NMR spectroscopy of crude product. The crude product was then purified by column chromatography on silica gel (Pentane/Acetone 25/1 to 15/1) to yield the corresponding resolved starting material and hydrogenated product. For substrates **1b**, **1c**, **1d**, **1f**, **1g**, **1h**, **1i**, **1j**, **1l**, **1m**, **1n**, **1o**, **1p**, **1q**, **1r**, **1s**, **1t**, **1v**, **1w**, **1x**, **1y**, **1ac**, **1ad**, **1ae**, **1af**, **1ag**, **1ah**, **1ai**, **1aj**, **1ak**, the resolved starting materials were isolated completely, and the purity of recovered starting material were confirmed by  $^1H$  NMR (spectra attached below). The pure resolved starting materials were used for the determinations of optical rotation and *ee* values. For substrates **1e**, **1u**, **1z**, **1aa**, **1ab**, the separations were not complete. The yields are based on the  $^1H$  NMR ratio of the amount of recovered starting material and hydrogenated product, and the mixtures were used for determinations of *ee* values. Few pure fractions were collected to obtain enantioenriched samples for the measurements of optical rotation. For substrate **1k**, the crude sample was passed through a plug of silica gel (Pentane/Diethyl ether 1/1), and then solvent was removed to obtain a mixture of resolved starting material and hydrogenated product, the mixture was used for the determination of *ee* value, no measurement of optical rotation was performed due to instability of the compound during purification. The *ee* values were determined using GC or SFC on chiral stationary phase.

**Table of Hydrogenation conditions**

| Allylic alcohol                                                                                       | Hydrogenation conditions |                      |                |               | Conversion |
|-------------------------------------------------------------------------------------------------------|--------------------------|----------------------|----------------|---------------|------------|
|                                                                                                       | Cat.<br>(mol %)          | $K_2CO_3$<br>(mol %) | $H_2$<br>(Bar) | Time<br>(min) |            |
| 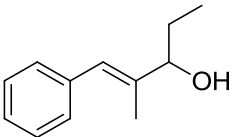<br>(±)- <b>1b</b> | 0.2                      | 10                   | 1              | 10            | 55%        |
| <br>(±)- <b>1c</b> | 0.5                      | 10                   | 1              | 20            | 57%        |
| <br>(±)- <b>1d</b> | 1.0                      | 10                   | 3              | 60            | 54%        |

|                                                                                                    |     |    |   |    |     |
|----------------------------------------------------------------------------------------------------|-----|----|---|----|-----|
| 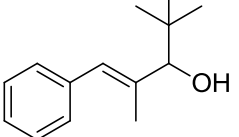<br><b>(±)-1e</b> | 1.0 | 10 | 3 | 60 | 52% |
| <br><b>(±)-1g</b> | 1.0 | 10 | 3 | 60 | 49% |

|                                                                                                      |     |    |   |    |     |
|------------------------------------------------------------------------------------------------------|-----|----|---|----|-----|
| 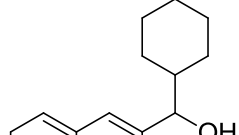<br><b>(±)-1h</b>   | 1.0 | 10 | 3 | 60 | 53% |
| <br><b>(±)-1i</b>  | 0.5 | 10 | 3 | 60 | 52% |
| <br><b>(±)-1f</b> | 0.2 | 20 | 1 | 15 | 61% |
| <br><b>(±)-1k</b> | 1.0 | 10 | 3 | 60 | 49% |
| <br><b>(±)-1l</b> | 0.2 | 10 | 1 | 10 | 55% |
| <br><b>(±)-1m</b> | 0.2 | 10 | 1 | 10 | 55% |

|                                                                                                          |     |    |   |    |     |
|----------------------------------------------------------------------------------------------------------|-----|----|---|----|-----|
| 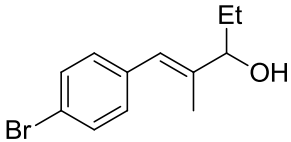 <p>(±)-<b>1p</b></p>   | 0.2 | 10 | 1 | 10 | 54% |
|  <p>(±)-<b>1o</b></p>   | 0.2 | 10 | 1 | 10 | 53% |
|  <p>(±)-<b>1n</b></p>   | 0.2 | 10 | 1 | 10 | 57% |
|  <p>(±)-<b>1q</b></p>   | 0.2 | 10 | 1 | 10 | 54% |
|  <p>(±)-<b>1r</b></p>  | 0.2 | 10 | 1 | 10 | 54% |
|  <p>(±)-<b>1t</b></p> | 0.2 | 10 | 1 | 10 | 52% |
|  <p>(±)-<b>1s</b></p> | 0.2 | 10 | 1 | 10 | 54% |
|  <p>(±)-<b>1v</b></p> | 1.0 | 10 | 3 | 60 | 56% |
|  <p>(±)-<b>1w</b></p> | 1.0 | 10 | 3 | 60 | 54% |

|                                                                                                       |     |    |   |    |     |
|-------------------------------------------------------------------------------------------------------|-----|----|---|----|-----|
| 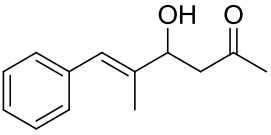<br><b>(±)-1x</b>    | 1.0 | 10 | 3 | 60 | 51% |
| <br><b>(±)-1y</b>    | 1.0 | 10 | 3 | 60 | 51% |
| <br><b>(±)-1j</b>    | 0.2 | 10 | 1 | 15 | 56% |
| <br><b>(±)-1u</b>    | 0.5 | 10 | 3 | 60 | 63% |
| <br><b>(±)-1z</b>   | 0.2 | 10 | 1 | 30 | 56% |
| <br><b>(±)-1aa</b> | 1.0 | 10 | 3 | 15 | 53% |
| <br><b>(±)-1ab</b> | 1.0 | 10 | 3 | 15 | 53% |
| <br><b>(±)-1ac</b> | 1.0 | 10 | 3 | 30 | 55% |
| <br><b>(±)-1ad</b> | 1.0 | 10 | 3 | 30 | 58% |



|                                                                                                       |     |    |   |    |     |
|-------------------------------------------------------------------------------------------------------|-----|----|---|----|-----|
| 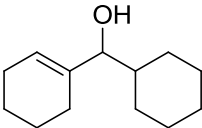<br><b>(±)-1ae</b>   | 1.0 | 10 | 3 | 30 | 58% |
| <br><b>(±)-1af</b>   | 1.0 | 10 | 5 | 60 | 61% |
| <br><b>(±)-1ag</b>   | 0.5 | 10 | 3 | 30 | 57% |
| <br><b>(±)-1ah</b>   | 0.5 | 10 | 3 | 30 | 64% |
| <br><b>(±)-1ai</b>  | 0.5 | 10 | 3 | 30 | 53% |
| <br><b>(±)-1aj</b> | 0.5 | 10 | 3 | 30 | 50% |
| <br><b>(±)-1ak</b> | 0.5 | 10 | 3 | 20 | 58% |

**Table of Kinetic Resolution Results**

| Recovered Allylic Alcohol                                                                                | Yield            | Separation Method                                                                         | <i>ee</i> & Optical Rotation                                                                                                                                                                |
|----------------------------------------------------------------------------------------------------------|------------------|-------------------------------------------------------------------------------------------|---------------------------------------------------------------------------------------------------------------------------------------------------------------------------------------------|
| 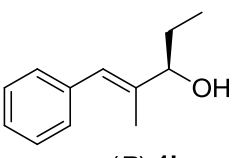<br><b>(R)-1b</b>       | 41%              | <b>SFC</b> , IC column, 5% MeOH, 2 ml/min, 254nm, $t_R$ = 7.6 min (major)/8.2 (minor)     | 99%<br>$[\alpha]_D^{25.0} = -39.5$<br>(c = 0.2 in CHCl <sub>3</sub> )<br>Lit. <sup>12</sup> (90% <i>ee</i> for <i>R</i> )<br>$[\alpha]_D^{20.0} = -40.3$<br>(c = 1.0 in CHCl <sub>3</sub> ) |
| <br><b>(R)-1c</b>       | 40%              | <b>SFC</b> , IC column, 5% MeOH, 2 ml/min, 254nm, $t_R$ = 7.6 min (major)/8.2 (minor)     | 99%<br>$[\alpha]_D^{25.0} = -46.5$<br>(c = 0.2 in CHCl <sub>3</sub> )<br>Lit. <sup>13</sup> (94% <i>ee</i> for <i>S</i> )<br>$[\alpha]_D^{25.0} = +18.0$<br>(c = 1.0 in CHCl <sub>3</sub> ) |
| <br><b>(R)-1d</b>       | 41%              | <b>SFC</b> , IC column, 5% MeOH, 2 ml/min, 230nm, $t_R$ = 6.2 min (major)/6.5 (minor)     | 99%<br>$[\alpha]_D^{25.0} = -49.5$<br>(c = 0.2 in CHCl <sub>3</sub> )                                                                                                                       |
| <br><b>(R)-1e</b>     | 47%<br>(mixture) | <b>SFC</b> , OJH column, 5% MeOH, 2 ml/min, 254nm, $t_R$ = 6.2 min (minor)/7.2 (major)    | 99%<br>$[\alpha]_D^{25.0} = -105.5$<br>(c = 0.2 in CHCl <sub>3</sub> )                                                                                                                      |
| <br><b>(R)-1g</b>     | 47%              | <b>SFC</b> , OJH column, 10% MeOH, 2 ml/min, 254nm, $t_R$ = 6.3 min (minor)/6.7 (major)   | 89%<br>$[\alpha]_D^{25.0} = -80.5$<br>(c = 0.2 in CHCl <sub>3</sub> )                                                                                                                       |
| <br><b>(1R,2R)-2g</b> | 46%              | <b>SFC</b> , OZH column, 10% MeOH, 2 ml/min, 210nm, $t_R$ = 11.5 min (minor)/12.5 (major) | 98% <i>ee</i><br>99:1 <i>d.r.</i><br>$[\alpha]_D^{22.0} = +2.6$<br>(c = 0.3 in CHCl <sub>3</sub> )                                                                                          |
| <br><b>(R)-1h</b>     | 45%              | <b>SFC</b> , ID column, 5% MeOH, 2 ml/min, 230nm, $t_R$ = 13.7 min (major)/15.2 (minor)   | 99%<br>$[\alpha]_D^{25.0} = -48.5$<br>(c = 0.2 in CHCl <sub>3</sub> )                                                                                                                       |

|                                                                                                 |     |                                                                                         |                                                                       |
|-------------------------------------------------------------------------------------------------|-----|-----------------------------------------------------------------------------------------|-----------------------------------------------------------------------|
| 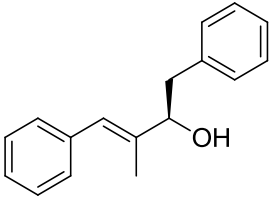 <p>(R)-1i</p> | 46% | <b>SFC</b> , OZH column, 10% MeOH, 2 ml/min, 254nm, $t_R$ = 7.0 min (minor)/7.4 (major) | 99%<br>$[\alpha]_D^{25.0} = -49.5$<br>(c = 0.2 in CHCl <sub>3</sub> ) |
|-------------------------------------------------------------------------------------------------|-----|-----------------------------------------------------------------------------------------|-----------------------------------------------------------------------|

|                                                                                                   |                  |                                                                                         |                                                                                                                                                                             |
|---------------------------------------------------------------------------------------------------|------------------|-----------------------------------------------------------------------------------------|-----------------------------------------------------------------------------------------------------------------------------------------------------------------------------|
| 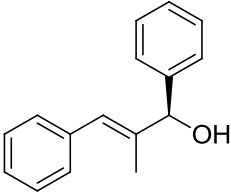 <p>(R)-1f</p>   | 37%              | <b>SFC</b> , IC column, 5% MeOH, 2 ml/min, 254nm, $t_R$ = 16.8 min (major)/20.3 (minor) | 99%<br>$[\alpha]_D^{25.0} = -5.5$<br>(c = 0.2 in CHCl <sub>3</sub> )<br>Lit. <sup>12</sup> (73% ee for R)<br>$[\alpha]_D^{25.0} = -15.5$<br>(c = 1.2 in CHCl <sub>3</sub> ) |
|  <p>(S)-1k</p>   | 45%<br>(mixture) | <b>SFC</b> , IC column, 5% MeOH, 2 ml/min, 230nm, $t_R$ = 4.8 min (major)/5.1 (minor)   | 87%<br>— —                                                                                                                                                                  |
|  <p>(R)-1l</p>  | 40%              | <b>SFC</b> , IC column, 5% MeOH, 2 ml/min, 254nm, $t_R$ = 9.2 min (major)/10.0 (minor)  | 99%<br>$[\alpha]_D^{25.0} = -29.0$<br>(c = 0.2 in CHCl <sub>3</sub> )                                                                                                       |
|  <p>(R)-1m</p> | 39%              | <b>SFC</b> , IC column, 5% MeOH, 2 ml/min, 254nm, $t_R$ = 15.3 min (major)/16.1 (minor) | 99%<br>$[\alpha]_D^{25.0} = -26.5$<br>(c = 0.2 in CHCl <sub>3</sub> )                                                                                                       |
|  <p>(R)-1p</p> | 44%              | <b>SFC</b> , IC column, 5% MeOH, 2 ml/min, 254nm, $t_R$ = 11.2 min (minor)/12.1 (major) | 99%<br>$[\alpha]_D^{25.0} = -27.0$<br>(c = 0.2 in CHCl <sub>3</sub> )                                                                                                       |
|  <p>(R)-1o</p> | 44%              | <b>SFC</b> , IC column, 5% MeOH, 2 ml/min, 254nm, $t_R$ = 7.9 min (major)/7.1 (minor)   | 99%<br>$[\alpha]_D^{25.0} = -34.0$<br>(c = 0.2 in CHCl <sub>3</sub> )                                                                                                       |
|  <p>(R)-1n</p> | 40%              | <b>SFC</b> , IC column, 5% MeOH, 2 ml/min, 254nm, $t_R$ = 5.9min (minor)/6.2 (major)    | 99%<br>$[\alpha]_D^{25.0} = -30.0$<br>(c = 0.2 in CHCl <sub>3</sub> )                                                                                                       |

|                                                                                                 |     |                                                                                        |                                                                       |
|-------------------------------------------------------------------------------------------------|-----|----------------------------------------------------------------------------------------|-----------------------------------------------------------------------|
| 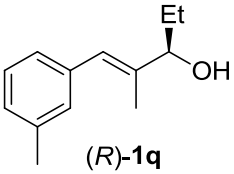 <p>(R)-1q</p> | 43% | <b>SFC</b> , IC column, 5% MeOH, 2 ml/min, 254nm, $t_R$ = 8.6 min (major)/9.5 (minor)  | 99%<br>$[\alpha]_D^{25.0} = -41.5$<br>(c = 0.2 in CHCl <sub>3</sub> ) |
|  <p>(R)-1r</p> | 40% | <b>SFC</b> , OJH column, 5% MeOH, 2 ml/min, 254nm, $t_R$ = 6.2 min (minor)/6.7 (major) | 95%<br>$[\alpha]_D^{25.0} = -41.5$<br>(c = 0.2 in CHCl <sub>3</sub> ) |

|                                                                                                   |     |                                                                                           |                                                                                                                                                                             |
|---------------------------------------------------------------------------------------------------|-----|-------------------------------------------------------------------------------------------|-----------------------------------------------------------------------------------------------------------------------------------------------------------------------------|
| 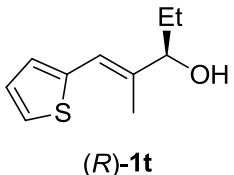 <p>(R)-1t</p>   | 45% | <b>SFC</b> , OJH column, 5% MeOH, 2 ml/min, 254nm, $t_R$ = 12.1 min (minor)/14.5 (major)  | 94%<br>$[\alpha]_D^{25.0} = -17.5$<br>(c = 0.2 in CHCl <sub>3</sub> )                                                                                                       |
|  <p>(R)-1s</p>   | 44% | <b>SFC</b> , OJH column, 5% MeOH, 2 ml/min, 254nm, $t_R$ = 12.5 min (minor)/13.8 (major)  | 99%<br>$[\alpha]_D^{25.0} = -30.0$<br>(c = 0.2 in CHCl <sub>3</sub> )                                                                                                       |
|  <p>(R)-1v</p> | 40% | <b>SFC</b> , IC column, 5% MeOH, 2 ml/min, 254nm, $t_R$ = 12.6 min (minor)/14.1 (major)   | 99%<br>$[\alpha]_D^{25.0} = +3.0$<br>(c = 0.2 in CHCl <sub>3</sub> )                                                                                                        |
|  <p>(R)-1w</p> | 42% | <b>SFC</b> , OJH column, 15% MeOH, 2 ml/min, 254nm, $t_R$ = 15.0 min (major)/16.5 (minor) | 93%<br>$[\alpha]_D^{25.0} = +29.0$<br>(c = 0.2 in CHCl <sub>3</sub> )                                                                                                       |
|  <p>(R)-1x</p> | 45% | <b>SFC</b> , OJH column, 10% MeOH, 2 ml/min, 254nm, $t_R$ = 5.4 min (major)/6.0 (minor)   | 89%<br>$[\alpha]_D^{25.0} = +13.0$<br>(c = 0.2 in CHCl <sub>3</sub> )                                                                                                       |
|  <p>(S)-1y</p> | 47% | <b>SFC</b> , IC column, 5% MeOH, 2 ml/min, 254nm, $t_R$ = 9.9 min (minor)/10.3 (major)    | 99%<br>$[\alpha]_D^{25.0} = -49.5$<br>(c = 0.2 in CHCl <sub>3</sub> )<br>Lit. <sup>8</sup> (86% ee for R)<br>$[\alpha]_D^{25.0} = +67.0$<br>(c = 1.0 in CHCl <sub>3</sub> ) |
|  <p>(R)-1j</p> | 40% | <b>SFC</b> , OJH column, 5% MeOH, 2 ml/min, 254nm, $t_R$ = 11.5 min (minor)/12.5 (major)  | 99%<br>$[\alpha]_D^{25.0} = +6.0$<br>(c = 0.2 in CHCl <sub>3</sub> )                                                                                                        |

|                                                                                                     |                  |                                                                                         |                                                                        |
|-----------------------------------------------------------------------------------------------------|------------------|-----------------------------------------------------------------------------------------|------------------------------------------------------------------------|
| 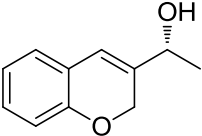<br><b>(R)-1z</b>  | 42%<br>(mixture) | <b>SFC</b> , OJH column, 10% MeOH, 2 ml/min, 254nm, $t_R$ = 7.4 min (minor)/8.2 (major) | 89%<br>$[\alpha]_D^{25.0} = +20.5$<br>( $c = 0.2$ in $\text{CHCl}_3$ ) |
| <br><b>(R)-1aa</b> | 45%<br>(mixture) | <b>SFC</b> , IA column, 5% MeOH, 2 ml/min, 210nm, $t_R$ = 7.9 min (major)/9.2 (minor)   | 89%<br>$[\alpha]_D^{25.0} = +5.0$<br>( $c = 0.1$ in $\text{CHCl}_3$ )  |

|                                                                                                       |                  |                                                                                                                        |                                                                                                                                                                                     |
|-------------------------------------------------------------------------------------------------------|------------------|------------------------------------------------------------------------------------------------------------------------|-------------------------------------------------------------------------------------------------------------------------------------------------------------------------------------|
| 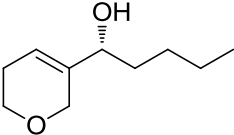<br><b>(R)-1ab</b>   | 44%<br>(mixture) | <b>SFC</b> , IA column, 5% MeOH, 2 ml/min, 210nm, $t_R$ = 6.2 min (minor)/6.7 (major)                                  | 90%<br>$[\alpha]_D^{25.0} = -1.5$<br>( $c = 0.2$ in $\text{CHCl}_3$ )                                                                                                               |
| <br><b>(R)-1ac</b>  | 41%              | <b>GC-MS</b> : column ChiralDEX $\beta$ -DM, 50°C to 175°C at 1°C/min. $t_R$ = 55.7 min(minor)/58.0(minor)/58.0(major) | 96%<br>$[\alpha]_D^{25.0} = -6.5$<br>( $c = 0.2$ in $\text{CHCl}_3$ )                                                                                                               |
| <br><b>(R)-1ad</b> | 40%              | <b>GC-MS</b> : column ChiralDEX $\beta$ -DM, 50°C to 175°C at 1°C/min. $t_R$ = 70.5 min(minor)/74.2(major)             | 99%<br>$[\alpha]_D^{25.0} = -0.5$<br>( $c = 0.2$ in $\text{CHCl}_3$ )                                                                                                               |
| <br><b>(R)-1ae</b> | 39%              | <b>SFC</b> , OJH column, 5% MeOH, 2 ml/min, 210nm, $t_R$ = 3.4 min (minor)/3.6 (major)                                 | 99%<br>$[\alpha]_D^{25.0} = -4.0$<br>( $c = 0.2$ in $\text{CHCl}_3$ )<br>Lit. <sup>9</sup> (98% ee for <i>S</i> )<br>$[\alpha]_D^{20.0} = +2.8$<br>( $c = 1.0$ in $\text{CHCl}_3$ ) |
| <br><b>(S)-1u</b>  | 35%<br>(below)   | <b>SFC</b> , IC column, 5% MeOH, 2 ml/min, 254nm, $t_R$ = 13.1 min (major)/14.2 (minor)                                | 98%<br>$[\alpha]_D^{25.0} = -14.0$<br>( $c = 0.1$ in $\text{CHCl}_3$ )                                                                                                              |
| <br><b>(R)-pu</b>  | 91%              | --                                                                                                                     | 98%<br>$[\alpha]_D^{25.0} = +103.0$<br>( $c = 0.5$ in EtOH)<br>Lit. <sup>14</sup> (99% ee for <i>R</i> )<br>$[\alpha]_D^{20.0} = +152.1$<br>( $c = 2.0$ in EtOH)                    |

|                                                                                                       |     |                                                                                                      |                                                                                                                                                                                    |
|-------------------------------------------------------------------------------------------------------|-----|------------------------------------------------------------------------------------------------------|------------------------------------------------------------------------------------------------------------------------------------------------------------------------------------|
| 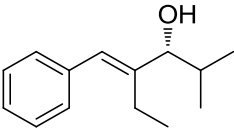<br><b>(S)-1af</b>   | 35% | <b>SFC</b> , IC column, 5% MeOH, 2 ml/min, 230nm, $t_R$ = 9.1 min (major)/10.1 (minor)               | 96%<br>$[\alpha]_D^{25.0} = -6.5$<br>(c = 0.2 in CHCl <sub>3</sub> )                                                                                                               |
| <br><b>(R)-1ag</b>   | 40% | <b>SFC</b> , IC column, 5% MeOH, 2 ml/min, 230nm, $t_R$ = 16.7 min (minor)/21.2 (major)              | 92%<br>$[\alpha]_D^{25.0} = +5.6$<br>(c = 0.3 in CHCl <sub>3</sub> )<br>Lit. <sup>21</sup> (91% ee for <i>R</i> )<br>$[\alpha]_D^{22.0} = +2.2$<br>(c = 0.9 in CHCl <sub>3</sub> ) |
| <br><b>(R)-1ah</b>   | 30% | <b>SFC</b> , IC column, 10% MeOH, 2 ml/min, 230nm, $t_R$ = 15.5min (minor)/19.7 (major)              | 99%<br>$[\alpha]_D^{25.0} = +58.5$<br>(c = 0.2 in CHCl <sub>3</sub> )                                                                                                              |
| <br><b>(R)-1ai</b>   | 42% | <b>GC-MS</b> : column ChiralDEX β-DM, 50°C to 140°C at 1°C/min. $t_R$ = 17.2 min(minor) /22.4(major) | 91%<br>$[\alpha]_D^{25.0} = +7.5$<br>(c = 0.2 in CHCl <sub>3</sub> )<br>Lit. <sup>22</sup> (–% ee for <i>R</i> )<br>$[\alpha]_D^{22.0} = +8.8$<br>(c = 1.0 in CHCl <sub>3</sub> )  |
| <br><b>(R)-1aj</b> | 43% | <b>GC-MS</b> : column ChiralDEX β-DM, 50°C to 140°C at 1°C/min. $t_R$ = 20.5 min(minor) /22.2(major) | 96%<br>$[\alpha]_D^{25.0} = +8.5$<br>(c = 0.3 in CHCl <sub>3</sub> )                                                                                                               |
| <br><b>(R)-1ak</b> | 36% | <b>SFC</b> , ODH column, 5% MeOH, 2 ml/min, 210nm, $t_R$ = 9.5min (major)/10.5 (minor)               | 96%<br>$[\alpha]_D^{25.0} = +19.0$<br>(c = 0.3 in CHCl <sub>3</sub> )                                                                                                              |

### Hydrogenated product 2g

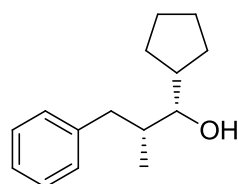

**(1R,2R)-2g**

### **(1R, 2R) -1-cyclopentyl-2-methyl-3-phenylpropan-1-ol.**

Colorless oil. 98% ee, 99:1 *d.r.*

<sup>1</sup>H NMR (400 MHz, CDCl<sub>3</sub>) δ 7.32 – 7.25 (m, 2H), 7.22 – 7.15 (m, 3H), 3.42 – 3.28 (m, 1H), 2.99 (dd, *J* = 13.3, 3.6 Hz, 1H), 2.32 (dd, *J* = 13.3, 10.5 Hz, 1H), 2.20 – 2.06 (m, 1H), 1.92 – 1.70 (m, 3H), 1.70 – 1.49 (m, 4H), 1.48 – 1.18 (m, 2H), 0.87 (d, *J* = 6.9 Hz, 3H). <sup>13</sup>C NMR (101 MHz, CDCl<sub>3</sub>) δ 141.71, 129.39, 128.32, 125.81, 80.24, 43.46, 39.49, 37.11, 29.45, 28.68, 25.83, 25.73, 16.82. HRMS-ESI; *m/z* [M+Na<sup>+</sup>] = 241.1565, calcd. For C<sub>17</sub>H<sub>20</sub>NaO: 241.1568.  $[\alpha]_D^{25.0} = +2.6$  (c = 0.3 in CHCl<sub>3</sub>)

## 4. Double stereodifferentiation and synthesis of ketone 3

**Double stereodifferentiation:** A vial was charged with the resolved allylic alcohol (*R*)-**1h** (22 mg) and Ir-complex (0.4 mg). Dry toluene (1 ml) was added and the vial was placed in a hydrogenation apparatus. The reactor was purged 3 times with N<sub>2</sub>, and then filled with H<sub>2</sub> (3 bar). The reaction was stirred at room temperature for 10 min before the H<sub>2</sub> pressure was released and the solvent was removed *in vacuo*. The crude product was purified through silica column chromatography to give the hydrogenated product 22 mg (quantitative yield).

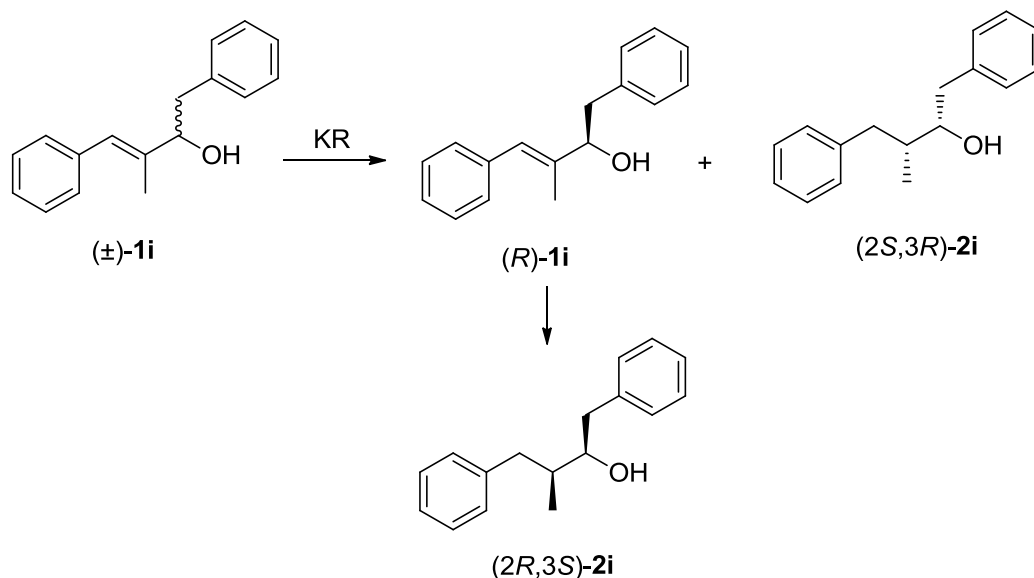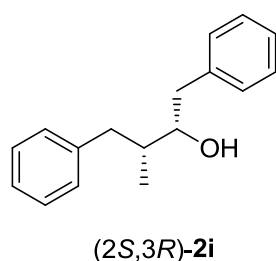

### (2*S*,3*R*)-3-methyl-1,4-diphenylbutan-2-ol.

Colorless oil. 96% *ee*, 96:4 *d.r.*

<sup>1</sup>H NMR (400 MHz, CDCl<sub>3</sub>) δ 7.40 – 7.15 (m, 10H), 3.70 (tt, *J* = 5.6, 3.4 Hz, 1H), 3.06 – 2.89 (m, 2H), 2.65 (dd, *J* = 13.6, 9.8 Hz, 1H), 2.46 (dd, *J* = 13.4, 9.4 Hz, 1H), 2.05 – 1.90 (m, 1H), 1.57 – 1.51 (m, 1H), 0.95 (d, *J* = 6.8 Hz, 3H). <sup>13</sup>C NMR (101 MHz, CDCl<sub>3</sub>) δ 141.10, 139.06, 129.55, 129.40, 128.82, 128.39, 126.66, 125.97, 76.30,

40.61, 40.51, 38.78, 15.54. HRMS-ESI; *m/z* [M+Na<sup>+</sup>] = 263.1409, calcd. For C<sub>17</sub>H<sub>20</sub>NaO: 263.1406. [α]<sub>D</sub><sup>25.0</sup> = -15.0 (c = 0.2 in CHCl<sub>3</sub>)

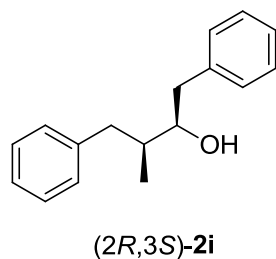

### (2*R*,3*S*)-3-methyl-1,4-diphenylbutan-2-ol.

Colorless oil. 99% *ee*, >99:1 *d.r.*

<sup>1</sup>H NMR (400 MHz, CDCl<sub>3</sub>) δ 7.40 – 7.15 (m, 10H), 3.70 (tt, *J* = 5.6, 3.4 Hz, 1H), 3.06 – 2.89 (m, 2H), 2.65 (dd, *J* = 13.6, 9.8 Hz, 1H), 2.46 (dd, *J* = 13.4, 9.4 Hz, 1H), 2.05 – 1.90 (m, 1H), 1.57 – 1.51 (m, 1H), 0.95 (d, *J* = 6.8 Hz, 3H). <sup>13</sup>C NMR (101 MHz, CDCl<sub>3</sub>) δ 141.10, 139.06, 129.55, 129.40, 128.82, 128.39, 126.66, 125.97, 76.30,

40.61, 40.51, 38.78, 15.54. HRMS-ESI; *m/z* [M+Na<sup>+</sup>] = 263.1409, calcd. For C<sub>17</sub>H<sub>20</sub>NaO: 263.1406. [α]<sub>D</sub><sup>25.0</sup> = +16.0 (c = 0.2 in CHCl<sub>3</sub>)

Ketone **3** was synthesized according to the following scheme:

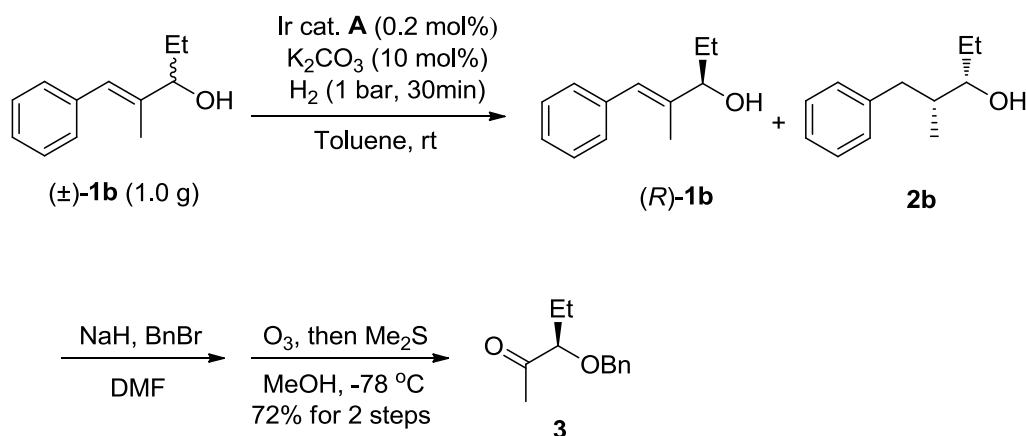

**Step 1**, gram scale kinetic resolution: A glass vial was charged with 1.0g (5.67mmol) racemic substrate (**±1b**), 78mg K<sub>2</sub>CO<sub>3</sub> (0.56 mmol) and 20 mg (0.011mol) catalyst, 8 ml dry toluene was added. The vial was placed in a hydrogenation apparatus and flushed 3 times with nitrogen. The reactor was then purged 8 times using hydrogen, before filling to the 1 bar. The reaction was stirred at room temperature for the 60 min before the hydrogen pressure was released and the solvent was removed under vacuum. The crude product was passed through a short silica gel layer, eluted with a mixture of Et<sub>2</sub>O: Pentane (1:1) and remove the solvent to give the mixture of resolved alcohol and hydrogenated product (992 mg, 99% yield, 46% NMR yield for **R-1b**).

**Step 2**, benzylation: the obtained mixture was used without further purification. To a solution of mixture (200mg) in 5ml THF/DMF(4:1) was added 60mg(1.5 eq) NaH slowly at 0 °C. The mixture was stirred 30 min and then 0.71 ml(3.0 eq) BnBr was added. The reaction was further stirred at room temperature overnight, and then was quenched with water and extracted with Et<sub>2</sub>O. After evaporation of the solvent, the crude extract was purified by column chromatography to afford a mixture of protected alcohols as a colorless oil (277 mg, 91%).

**Step 3**, ozonolysis: To a stirred solution of the mixture of protected alcohols (277mg) in MeOH at -78°C was bubbled through freshly generated ozone. After the color of the reaction mixture changed to light blue (ca.10min), it was quenched with dimethyl sulfide (0.3 ml, 4eq) and allowed to warm to room temperature. After 1 h, the solvent was removed under reduced pressure, and the obtained residue was purified by flash column chromatography to afford pure methyl ketone **3** (71 mg 79%).

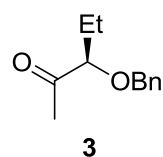

**(R)-3-(benzyloxy)pentan-2-one.**

Colorless oil.

<sup>1</sup>H NMR (400 MHz, CDCl<sub>3</sub>) δ 7.40 – 7.28 (m, 5H), 4.58 (d, *J* = 11.7 Hz, 1H), 4.45 (d, *J* = 11.7 Hz, 1H), 3.71 (dd, *J* = 7.0, 5.7 Hz, 1H), 2.18 (s, 3H), 1.79 – 1.66 (m, 2H), 0.96 (t, *J* = 7.4 Hz, 3H). <sup>13</sup>C NMR (101 MHz, CDCl<sub>3</sub>) δ 211.61, 137.73, 128.62, 128.05, 127.96, 86.48, 72.47, 25.61, 25.29, 9.71. [α]<sub>D</sub><sup>25.0</sup> = +58.0 (c = 0.5 in CHCl<sub>3</sub>) Lit.<sup>15</sup>(S) [α]<sub>D</sub><sup>25.0</sup> = -113 (c = 2.6 in CHCl<sub>3</sub>)



## 5. Asymmetric formal synthesis of inthomycin A and B.

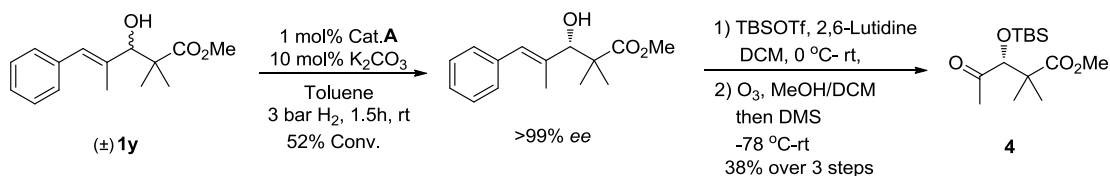

**(*R*)-methyl-3-((tert-butyldimethylsilyl)oxy)-2,2-dimethyl-4-oxopentanoate (4):** kinetic resolution: A glass vial was charged with 248 mg (1.0 mmol) racemic substrate (**±1y**), 13.8 mg  $K_2CO_3$  (0.1 mmol) and 16.3 mg (0.01 mmol) catalyst, 3 ml dry toluene was added. The vial was placed in a hydrogenation apparatus and flushed 3 times with nitrogen. The reactor was then purged 8 times using hydrogen, before filling to the 3 bar. The reaction was stirred at room temperature for the 1.5 h before the hydrogen pressure was released and the solvent was removed under vacuum. The crude product was passed through a short silica gel layer, eluted with a mixture of  $Et_2O$ : Pentane (1:1) and remove the solvent to give the mixture of resolved alcohol and hydrogenated product. (4 separated reactions were set parallel in the same reactor)

To a solution of the resolved mixture (4.0 mmol) in  $CH_2Cl_2$  were added 2,6-lutidine (1.8 ml, 16 mmol) and TBSOTf (2.3 ml, 10 mmol) at 0 °C. The mixture was allowed to warm to room temperature and stirring was continued for 0.5 h. The reaction was quenched with saturated  $NH_4Cl$  at 0 °C and extracted with  $Et_2O$ . The extract was washed with brine, dried over  $Na_2SO_4$ , and concentrated to give crude product. The crude product was passed through a short silica gel layer, eluted with a mixture of  $Et_2O$ : Pentane (5:95) and remove the solvent to give the mixture of the protected products.

To a stirred solution of the mixture of protected alcohols in a mixture of  $MeOH:CH_2Cl_2$  (1:4) 20 ml at -78 °C was bubbled through freshly generated ozone. After the color of the reaction mixture changed to light blue (ca. 25 min), it was quenched with dimethyl sulfide (1.2 ml, 4 eq) and allowed to warm to room temperature. After 1 h, the solvent was removed under reduced pressure, and the obtained residue was purified by flash column chromatography to afford pure methyl ketone **4** (438 mg 38%).

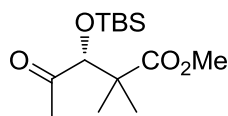

### **(*R*)-methyl 3-((tert-butyldimethylsilyl)oxy)-2,2-dimethyl-4-oxopentanoate**

Colorless oil.  $R_f$  = 0.3 ( $Et_2O$ : Pentane = 1:4)

$^1H$  NMR (400 MHz,  $CDCl_3$ )  $\delta$  4.18 (s, 1H), 3.68 (s, 3H), 2.15 (s, 3H), 1.21 (s, 3H), 1.13 (s, 3H), 0.94 (s, 9H), 0.07 (s, 3H), 0.03 (s, 3H).

$^{13}C$  NMR (101 MHz,  $CDCl_3$ )  $\delta$  211.45, 175.81, 82.80, 52.11, 47.66,

27.58, 25.84, 22.06, 20.81, 18.13, -4.55, -5.05. HRMS-ESI;  $m/z$  [ $M+Na^+$ ] = 311.1660, calcd. For  $C_{14}H_{28}NaO_4Si$ : 311.1649.  $[\alpha]_D^{26.6} = +34.6$  ( $c = 0.5$  in  $CHCl_3$ )

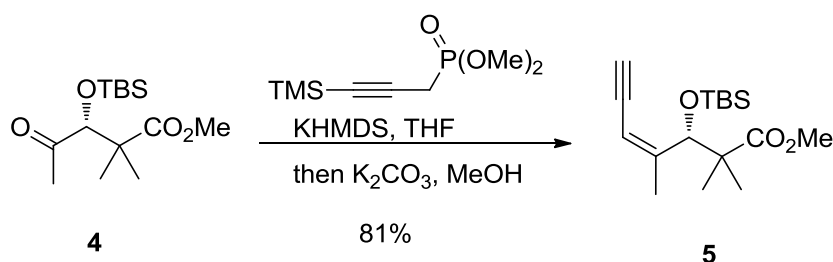

**(*S,Z*)-methyl 3-((tert-butyldimethylsilyl)oxy)-2,2,4-trimethylhept-4-en-6-ynoate (5):** To a solution of phosphonate (881mg, 4.0 mmol) in THF (10 mL) was added KHMDS (4.2 mL of 1M solution in THF, 4.2 mmol) at 0 °C and the mixture was stirred at 0 °C for 30 min. Then the mixture was then cooled to -78 °C and a solution of methylketone **4** ( 577 mg, 2.0 mmol) in THF (3ml) was added to the mixture at -78 °C. The mixture was stirred at -78 °C for 1 h and slowly warm to 0 °C over 2h, and then quenched by the addition of H<sub>2</sub>O. The mixture was extracted with Et<sub>2</sub>O, dried over Na<sub>2</sub>SO<sub>4</sub> and evaporated to give a mixture of TMS protected and deprotected enyl. The residue was dissolved in MeOH (10ml) and was added K<sub>2</sub>CO<sub>3</sub> (828 mg, 6 mmol) and stirred at room temperature overnight. The reaction mixture was filtered and concentrated to give the crude product. Flash chromatography (10: 90 Et<sub>2</sub>O/Pentane) to afford the enyne **5** (503 mg, 81%) with exclusive stereoselectivity.

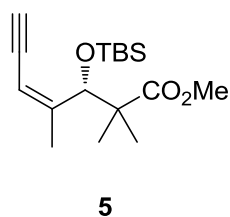

**(*S,Z*)-methyl 3-((tert-butyldimethylsilyl)oxy)-2,2,4-trimethylhept-4-en-6-ynoate**

Colorless oil. *R*<sub>f</sub>=0.4 (Et<sub>2</sub>O: Pentane= 1:10)

<sup>1</sup>H NMR (400 MHz, CDCl<sub>3</sub>) δ 5.45 – 5.41 (m, 1H), 5.15 (s, 1H), 3.66 (s, 3H), 3.13 (s, 1H), 1.80 (d, *J* = 1.1 Hz, 3H), 1.21 (s, 3H), 1.18 (s, 3H), 0.87 (s, 9H), 0.05 (s, 3H), -0.02 (s, 3H).

<sup>13</sup>C NMR (101 MHz, CDCl<sub>3</sub>) δ 177.01, 152.99, 108.65, 82.00, 80.78, 76.51, 51.88, 49.28, 25.83, 22.70, 20.84, 18.79, 18.16, -4.81, -5.47.

HRMS-ESI; *m/z* [M+Na<sup>+</sup>] = 333.1854, calcd. For C<sub>17</sub>H<sub>30</sub>NaO<sub>3</sub>Si: 333.1856. [α]<sub>D</sub><sup>27.0</sup> = -127.2 (c = 0.5 in CHCl<sub>3</sub>)

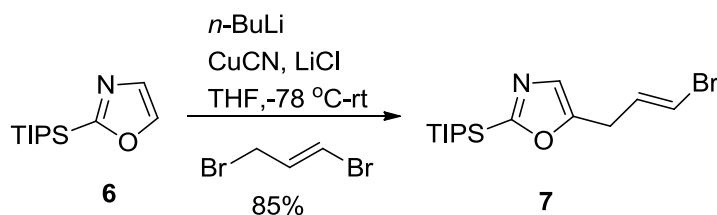

**(*E*)-5-(3-bromoallyl)-2-(triisopropylsilyl)oxazole (7):** To a solution a TIPS oxazole **6** (902mg, 4mmol) in THF (20 ml) was added *n*-BuLi (2.2 mL, 1.9 M in hexanes, 4.2 mmol) dropwise at -78 °C. The reaction mixture was stirred for 30 min at -78 °C and a solution of LiCl (144 mg, 3.4 mmol) and CuCN (154 mg, 1.7 mmol) in THF (6 mL) was added dropwise. After a further 2 h, *trans* 1,3-dibromoprop-1-ene (1.2 g, 6 mmol) was added dropwise and the reaction stirred at room temperature for 2 h. The reaction was quenched with saturated NH<sub>4</sub>Cl and extracted with Et<sub>2</sub>O. The combined organic phase was washed with brine, dried over Na<sub>2</sub>SO<sub>4</sub> and concentrated to give the crude product. Flash chromatography (5:95 to 10:90 Et<sub>2</sub>O/Pentane) to afford the vinyl bromide **7** (1.170g , 85%).

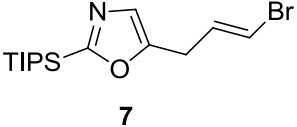
**(E)-5-(3-bromoallyl)-2-(triisopropylsilyl)oxazole**  
 Colorless oil.  $R_f=0.3$  (Et<sub>2</sub>O: Pentane= 1:8)  
<sup>1</sup>H NMR (400 MHz, CDCl<sub>3</sub>)  $\delta$  6.86 (s, 1H), 6.37 – 6.12 (m, 2H), 3.45 (d,  $J$  = 6.7 Hz, 2H), 1.37 (dt,  $J$  = 14.4, 7.3 Hz, 3H), 1.12 (d,  $J$  = 7.4 Hz, 18H). <sup>13</sup>C NMR (101 MHz, CDCl<sub>3</sub>)  $\delta$  168.42, 150.73, 132.15, 123.39, 107.82, 29.38, 18.50, 11.11. HRMS-ESI;  $m/z$  [M+H<sup>+</sup>] = 344.1038, calcd. For C<sub>15</sub>H<sub>27</sub>BrNOSi: 344.1040.

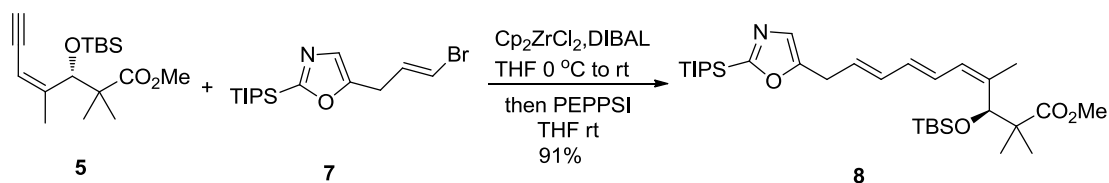

**(S,4Z,6E,8E)-methyl-3-((tert-butyldimethylsilyl)oxy)-2,2,4-trimethyl-10-(2-(triisopropylsilyl)oxazol-5-yl)deca-4,6,8-trienoate (8):** To a solution of ZrCp<sub>2</sub>Cl<sub>2</sub> (584 mg, 2.0 mmol) in THF (4.5 mL) was added dropwise a solution of DIBAL (2.0 mL, 1.0 M solution in hexane, 2.0 mmol) at 0 °C in dark under argon atmosphere, and the resulting suspension was stirred at 0 °C for 30 min followed by the addition of a solution of enyl **5** (415 mg, 1.3 mmol) in THF (2 mL). The reaction mixture was warmed to room temperature and stirred for further 30 min. To a solution of vinyl bromide (344 mg, 1.0 mmol) and PEPPSI (34 mg, 0.05 mmol) in THF (3 mL) was added the above reaction mixture, and the resulting reaction mixture was stirred at room temperature 24h. The reaction mixture was quenched with water and extracted with Et<sub>2</sub>O. The extract was dried over Na<sub>2</sub>SO<sub>4</sub> and concentrated to give crude product. Flash chromatography (5:95 to 10:90 Et<sub>2</sub>O/Pentane) to afford the triene **8** (524 mg, 91%).

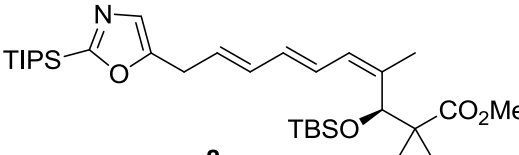
**(S,Z)-methyl 3-((tert-butyldimethylsilyl)oxy)-2,2,4-trimethylhept-4-en-6-ynoate**  
 Pale yellow oil.  $R_f=0.4$  (Et<sub>2</sub>O: Pentane= 1:10)

<sup>1</sup>H NMR (400 MHz, CDCl<sub>3</sub>)  $\delta$  6.84 (s, 1H), 6.41 (t,  $J$  = 12.5 Hz, 1H), 6.26 – 6.04 (m, 2H), 5.98 (d,  $J$  = 11.4 Hz, 1H), 5.82 – 5.68 (m, 1H), 4.93 (s, 1H), 3.61 (s, 3H), 3.50 (d,  $J$  = 6.6 Hz, 2H), 1.78 (s, 3H), 1.45 – 1.24 (m, 6H), 1.21 (s, 3H), 1.13 (d,  $J$  = 7.4 Hz, 18H), 1.09 (s, 3H), 0.91 – 0.84 (m, 12H). <sup>13</sup>C NMR (101 MHz, CDCl<sub>3</sub>)  $\delta$  177.14, 167.99, 152.56, 138.12, 133.22, 131.87, 129.75, 127.91, 127.64, 123.08, 74.32, 51.83, 49.60, 34.27, 29.11, 25.85, 22.48, 22.37, 21.47, 19.94, 18.53, 18.20, 14.19, 11.14, -4.72, -5.40. HRMS-ESI;  $m/z$  [M+Na<sup>+</sup>] = 578.3713, calcd. For C<sub>17</sub>H<sub>20</sub>NaO: 578.3718.  $[\alpha]_D^{27.0} = -97.6$  (c = 0.5 in CHCl<sub>3</sub>)

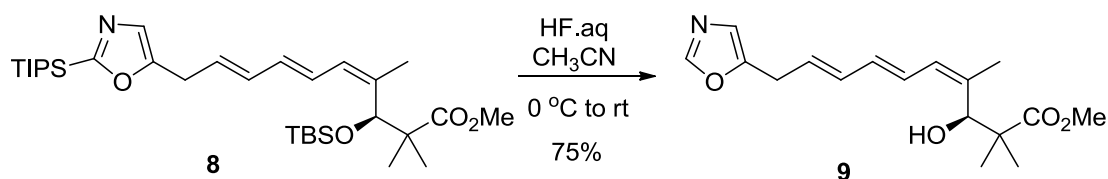

**(*S*,4*Z*,6*E*,8*E*)-methyl-3-hydroxy-2,2,4-trimethyl-10-(oxazol-5-yl)deca-4,6,8-trienoate (9):** To a solution of **8** (175mg, 0.3 mmol) in CH<sub>3</sub>CN (4 ml) was added HF-pyridine (0.4 ml) at 0 °C. The reaction mixture was stirred at room temperature for 10 h and the basified with saturated NaHCO<sub>3</sub> at 0 °C and extracted with CH<sub>2</sub>Cl<sub>2</sub> and dried over Na<sub>2</sub>SO<sub>4</sub> and concentrated to give crude product. Flash chromatography (20:80 to 40:60 EtOAc/Pentane) to afford the alcohol **8** (68 mg, 75%), *ee* >99% determined by chiral SFC, OJH column, 10% MeOH, 2 ml/min, 254nm, *t*<sub>R</sub> = 4.3 min (minor)/4.7 (major).

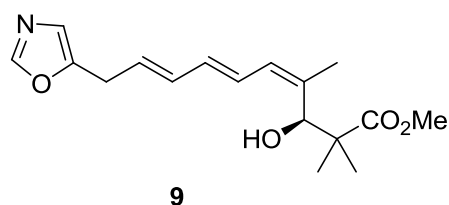

**(*S*,4*Z*,6*E*,8*E*)-methyl 3-hydroxy-2,2,4-trimethyl-10-(oxazol-5-yl)deca-4,6,8-trienoate**

Pale yellow oil.

*R*<sub>f</sub>=0.3 (EtOAc/Pentane = 1:2)

<sup>1</sup>H NMR (400 MHz, CDCl<sub>3</sub>) δ 7.78 (s, 1H), 6.79 (s, 1H), 6.43 (dd, *J* = 13.8, 11.5 Hz, 1H), 6.24 – 6.08 (m, 2H), 6.03 (d, *J* = 11.4 Hz, 1H), 5.78 – 5.68 (m, 1H), 4.72 (d, *J* = 6.1 Hz, 1H), 3.71 (s, 3H), 3.48 (d, *J* = 6.8 Hz, 2H), 3.26 (d, *J* = 6.4 Hz, 1H), 1.75 (s, 3H), 1.27 (s, 3H), 1.16 (s, 3H). <sup>13</sup>C NMR (101 MHz, CDCl<sub>3</sub>) δ 178.51, 150.95, 150.55, 136.99, 133.53, 131.91, 130.32, 128.04, 127.38, 122.71, 75.26, 52.35, 47.00, 28.99, 24.51, 21.18, 19.66. HRMS-ESI; *m/z* [M+Na<sup>+</sup>] = 328.1526, calcd. For C<sub>17</sub>H<sub>23</sub>NNaO<sub>4</sub>: 328.1519. [α]<sub>D</sub><sup>27.0</sup> = -87.0 (*c* = 0.5 in CHCl<sub>3</sub>) Lit.<sup>17</sup>(*R*) [α]<sub>D</sub><sup>27.0</sup> = +81.9 (*c* = 0.99 in CHCl<sub>3</sub>)

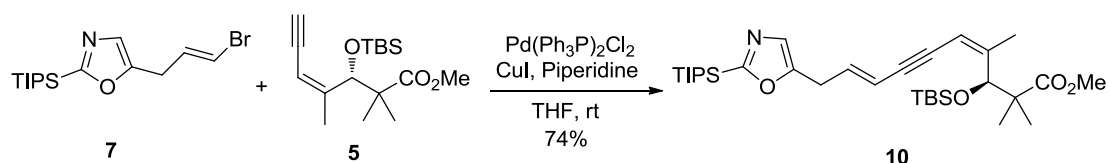

**(*S*,4*Z*,8*E*)-methyl-3-((tert-butyldimethylsilyl)oxy)-2,2,4-trimethyl-10-(2-(triisopropylsilyl)oxazol-5-yl)deca-4,8-dien-6-ynoate (10):** To a mixture of Pd(Ph<sub>3</sub>P)<sub>2</sub>Cl<sub>2</sub> (35 mg, 0.05mmol) and CuI (19 mg, 0.1 mmol) in THF (3ml) under argon, piperidine (0.3ml 3mmol) and vinyl bromide **7** (344mg, 1.0mmol) were added, followed by the addition of enyl **5** (341mg 1.1mmol). The reaction mixture was allowed to stirred for 30 mins at room temperature. The resulting mixture was diluted with Et<sub>2</sub>O then filter through short pad of silica gel using Et<sub>2</sub>O as eluent. The solution was washed with saturated NH<sub>4</sub>Cl, dried over Na<sub>2</sub>SO<sub>4</sub> and concentrated to give the crude product. Flash chromatography (5:95 to 10:90 Et<sub>2</sub>O/Pentane) to afford the product **10** (424mg, 74%).

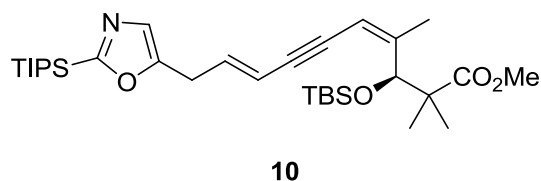

**(*S*,4*Z*,8*E*)-methyl-3-((tert-butyl dimethylsilyl)oxy)-2,2,4-trimethyl-10-(2-(triisopropylsilyl)oxazol-5-yl)deca-4,8-dien-6-ynoate**

Pale yellow oil.

*R*<sub>f</sub>=0.4 (Et<sub>2</sub>O: Pentane= 1:10)

<sup>1</sup>H NMR (400 MHz, CDCl<sub>3</sub>) δ 6.87 (s, 1H), 6.19 (dt, *J* = 15.7, 6.7 Hz, 1H), 5.74 (dd, *J* = 15.8, 1.9 Hz, 1H), 5.53 (s, 1H), 5.14 (s, 1H), 3.63 (s, 3H), 3.55 (d, *J* = 6.7 Hz, 2H), 1.81 (d, *J* = 1.3 Hz, 3H), 1.58 (s, 1H), 1.45 – 1.22 (m, 6H), 1.20 (s, 3H), 1.16 (s, 3H), 1.13 (d, *J* = 7.4 Hz, 18H), 0.90 – 0.84 (m, 12H), 0.04 (s, 3H), -0.03 (s, 3H). <sup>13</sup>C NMR (101 MHz, CDCl<sub>3</sub>) δ 177.04, 168.27, 151.52, 151.02, 136.98, 123.35, 112.92, 109.62, 92.18, 86.92, 76.62, 51.83, 49.19, 29.45, 25.81, 22.67, 20.82, 18.87, 18.51, 18.15, 11.11, -4.77, -5.54. HRMS-ESI; *m/z* [M+Na<sup>+</sup>] = 596.3562, calcd. For C<sub>32</sub>H<sub>55</sub>NNaO<sub>4</sub>Si<sub>2</sub>: 596.3561. [α]<sub>D</sub><sup>27.0</sup> = -124.4 (*c* = 0.5 in CHCl<sub>3</sub>)

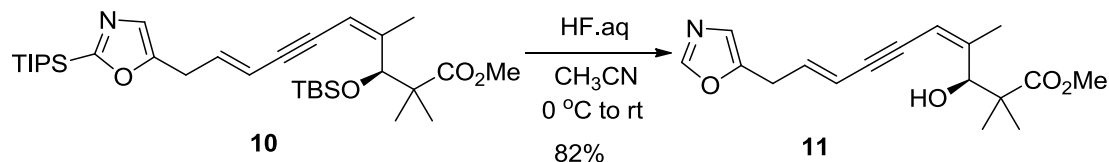

**(*S*,4*Z*,8*E*)-methyl-3-hydroxy-2,2,4-trimethyl-10-(oxazol-5-yl)deca-4,8-dien-6-ynoate (11):** To a solution of **10** (143mg, 0.25 mmol) in CH<sub>3</sub>CN (10 ml) was added 47% HF (2.0 ml) at 0 °C. The reaction mixture was stirred at room temperature overnight and the basified with saturated NaHCO<sub>3</sub> at 0 °C and extracted with CH<sub>2</sub>Cl<sub>2</sub> and dried over Na<sub>2</sub>SO<sub>4</sub> and concentrated to give crude product. Flash chromatography (20:80 to 40:60 EtOAc/Pentane) to afford the alcohol **11** (62 mg, 82%), *ee* >99% determined by chiral SFC, OJH column, 10% MeOH, 2 ml/min, 254nm, *t<sub>R</sub>* = 3.7 min (major)/4.0 (minor)

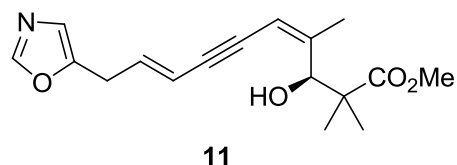

**(*S*,4*Z*,8*E*)-methyl-3-hydroxy-2,2,4-trimethyl-10-(oxazol-5-yl)deca-4,8-dien-6-ynoate**

Pale yellow oil.

*R<sub>f</sub>* = 0.3 (EtOAc/Pentane = 1:2)

<sup>1</sup>H NMR (400 MHz, CDCl<sub>3</sub>) δ 7.79 (s, 1H), 6.82 (s, 1H), 6.11 (dt, *J* = 15.7, 6.8 Hz, 1H), 5.73 (dd, *J* = 15.8, 1.7 Hz, 1H), 5.57 (s, 1H), 4.83 (d, *J* = 7.2 Hz, 1H), 3.71 (s, 3H), 3.57 (d, *J* = 7.2 Hz, 1H), 3.50 (d, *J* = 6.8 Hz, 2H), 1.75 (d, *J* = 1.3 Hz, 3H), 1.32 (s, 3H), 1.18 (s, 3H). <sup>13</sup>C NMR (101 MHz, CDCl<sub>3</sub>) δ 178.41, 150.72, 149.84, 149.68, 136.53, 123.07, 113.25, 109.75, 91.78, 86.98, 77.30, 52.32, 46.78, 29.15, 24.64, 20.84, 18.51. HRMS-ESI; *m/z* [M+Na<sup>+</sup>] = 326.1368, calcd. For C<sub>17</sub>H<sub>21</sub>NNaO<sub>4</sub>: 326.1363. [α]<sub>D</sub><sup>27.0</sup> = +34.0 (*c* = 0.5 in CHCl<sub>3</sub>) Lit.<sup>18</sup>(*R*) [α]<sub>D</sub><sup>25.0</sup> = -26.1 (*c* = 0.6 in CHCl<sub>3</sub>)

## 6. DFT calculation

### Computational Details

All calculations were performed with Jaguar<sup>[1]</sup> (version 10.1) using the B3LYP-D3<sup>[2,3]</sup> functional in combination with the LACVP\*\* basis set.<sup>[4]</sup> First, all the structures were optimized in the gas phase. The solvent energies for the optimized structures were then calculated using the Poisson-Boltzmann solver with toluene as the solvent. The energies that are shown, with the XYZ coordinates, were obtained from the optimized in the gas phase calculations. All the transition states were characterized by one negative vibrational frequency. The XYZ coordinates of the calculated structures are listed below. All computations were carried out using the computational cluster resources at the National Supercomputer Centre based at Linköping University, Sweden.

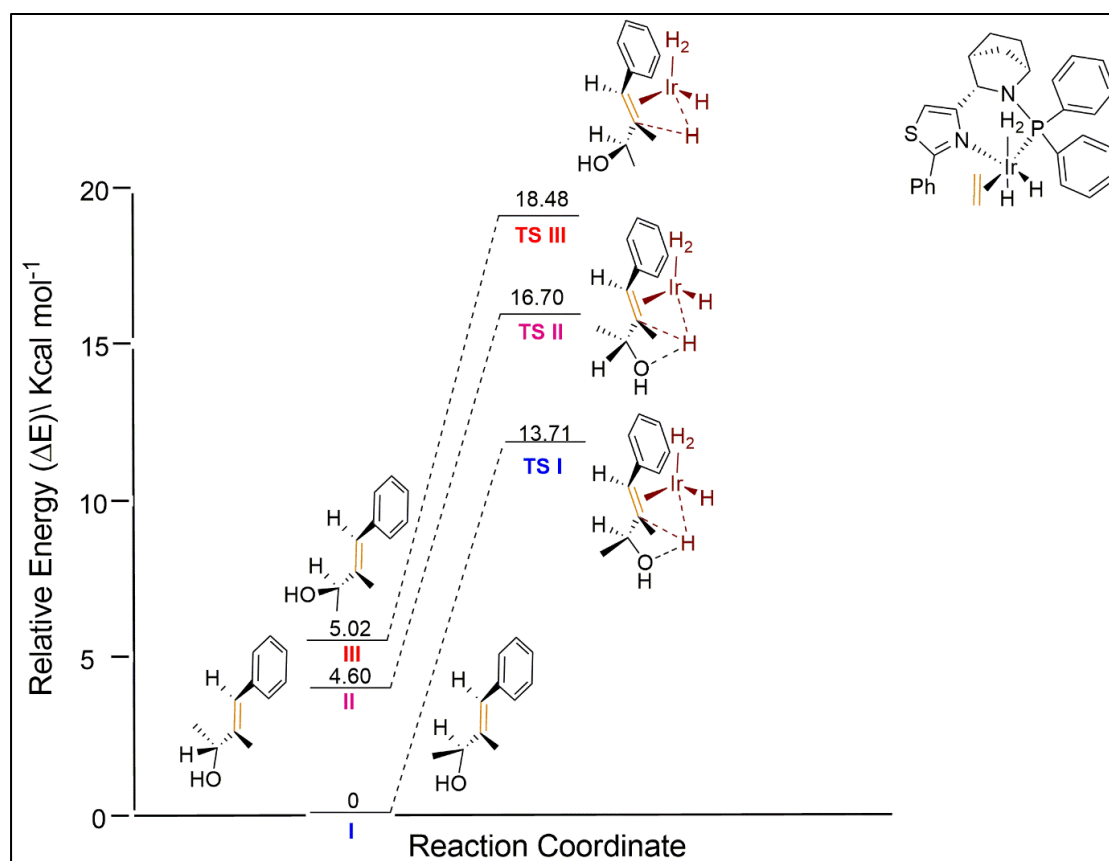

**Figure 1:** Energy profile depicting the transition state of the 3 diastereomers

## XYZ coordinates of structures calculated

Start struc I (Energy = -2502.917707 Hartrees, 0 Kcal mol<sup>-1</sup>)

N1 1.6720290000000 1.4404950000000 -0.2942120000000  
C2 3.9801810000000 1.6695860000000 -1.1074260000000  
C3 2.1869590000000 3.2231680000000 -1.7120120000000  
C4 3.4006230000000 2.4700650000000 -2.3229730000000  
C5 1.0786770000000 2.1737280000000 -1.4403950000000  
C6 2.9923860000000 2.0494030000000 0.0165270000000  
H7 4.9962490000000 1.9912990000000 -0.8568660000000  
H8 3.1036650000000 1.8228190000000 -3.1536850000000  
H9 0.9236690000000 1.5337460000000 -2.3160650000000  
H10 3.3037020000000 1.8051640000000 1.0332690000000  
H11 3.9985960000000 0.5903830000000 -1.2725050000000  
H12 1.8485130000000 4.0716450000000 -2.3112790000000  
H13 4.1270240000000 3.1893200000000 -2.7109250000000  
C14 2.6954180000000 3.5269910000000 -0.2850220000000  
H15 1.9417340000000 3.9609590000000 0.3780940000000  
H16 3.5906870000000 4.1546590000000 -0.2774930000000  
C17 -0.2800390000000 2.7142960000000 -1.0495710000000  
N18 -1.2105070000000 1.9733800000000 -0.4812780000000  
C19 -2.3279110000000 2.7254150000000 -0.1120280000000  
C20 -2.2540290000000 4.0367340000000 -0.4809580000000  
H21 -2.9778070000000 4.8142270000000 -0.2821080000000  
P22 1.0557060000000 0.0131220000000 0.3470710000000  
Ir23 -0.9932580000000 -0.3160540000000 -0.6029700000000  
H24 -1.9625620000000 -0.3009560000000 0.9900940000000  
C25 0.9285620000000 0.3081900000000 2.1449060000000  
C26 0.4388730000000 0.7493730000000 4.8662030000000  
C27 0.7176440000000 1.6093850000000 2.6224940000000  
C28 0.8853460000000 -0.7725790000000 3.0393390000000  
C29 0.6422960000000 -0.5495980000000 4.3939000000000  
C30 0.4777470000000 1.8274220000000 3.9797420000000  
H31 1.0494500000000 -1.7851310000000 2.6808400000000  
H32 0.6166320000000 -1.3895210000000 5.0821210000000  
H33 0.3236960000000 2.8386970000000 4.3452770000000  
H34 0.2535140000000 0.9203400000000 5.9226610000000  
S35 -0.7404450000000 4.3710340000000 -1.2486050000000  
C36 -3.4289490000000 2.1513100000000 0.6881530000000  
C37 -3.1467700000000 1.5840740000000 1.9414520000000  
C38 -4.7568040000000 2.2214880000000 0.2444610000000  
C39 -4.1784100000000 1.0748720000000 2.7277500000000  
H40 -2.1222470000000 1.5685160000000 2.3042380000000  
C41 -5.7877890000000 1.7142980000000 1.0380910000000  
H42 -4.9764230000000 2.6663690000000 -0.7221340000000  
C43 -5.4998540000000 1.1372120000000 2.2765040000000  
H44 -3.9527760000000 0.6405500000000 3.6973960000000  
H45 -6.8145790000000 1.7670760000000 0.6885980000000  
H46 -6.3032160000000 0.7433080000000 2.8922700000000  
C47 2.3244760000000 -1.2827590000000 0.1597770000000

C48 3.42575600000000 -1.33540100000000 1.03054500000000  
 C49 2.25899700000000 -2.16630900000000 -0.92730200000000  
 C50 4.44410000000000 -2.26168000000000 0.81519700000000  
 H51 3.48381200000000 -0.66329000000000 1.88155300000000  
 C52 3.28149100000000 -3.09069500000000 -1.13791600000000  
 C53 4.37275200000000 -3.13968700000000 -0.26855800000000  
 H54 5.29067500000000 -2.30003400000000 1.49436300000000  
 H55 3.22348700000000 -3.77632500000000 -1.97814300000000  
 H56 5.16616500000000 -3.86280100000000 -0.43320200000000  
 H65 -1.66185000000000 -1.05417200000000 0.93232200000000  
 C66 -3.70705400000000 -4.53950100000000 -0.62631500000000  
 C67 -3.23521000000000 -3.38205100000000 -1.24165300000000  
 C68 -3.65964900000000 -2.11521600000000 -0.80241900000000  
 C69 -4.57239600000000 -2.05524100000000 0.26733600000000  
 C70 -5.04326200000000 -3.21293900000000 0.87978200000000  
 C71 -4.60931200000000 -4.46324000000000 0.43636600000000  
 H72 -3.36553600000000 -5.50843700000000 -0.97934400000000  
 H73 -2.52925700000000 -3.47623300000000 -2.05357200000000  
 H74 -4.90656400000000 -1.08506700000000 0.62663200000000  
 H75 -5.74706100000000 -3.13973000000000 1.70421500000000  
 H76 -4.97030600000000 -5.36994900000000 0.91314000000000  
 C77 -3.21627400000000 -0.81567000000000 -1.35441300000000  
 H78 -3.76346400000000 0.01782700000000 -0.91899200000000  
 C79 -2.49954700000000 -0.49685200000000 -2.50549500000000  
 C80 -1.95992600000000 -1.48910800000000 -3.51582500000000  
 H81 -1.36825200000000 -0.95749900000000 -4.26292700000000  
 H82 -1.32358200000000 -2.24514700000000 -3.06156600000000  
 H83 -2.79262500000000 -1.99654300000000 -4.01771400000000  
 C84 -2.71510000000000 0.90922800000000 -3.06452300000000  
 H85 -3.04922000000000 1.56195600000000 -2.24932500000000  
 C86 -3.81127000000000 0.88653600000000 -4.13822500000000  
 H87 -4.74703000000000 0.49980100000000 -3.72461600000000  
 H88 -4.00232400000000 1.90269700000000 -4.50292100000000  
 H89 -3.52029000000000 0.26425300000000 -4.98862000000000  
 O90 -1.48070800000000 1.39798300000000 -3.59539000000000  
 H91 -1.68543600000000 2.07934800000000 -4.24809200000000  
 H92 -0.19940600000000 -0.14484800000000 -1.95235500000000  
 H93 -0.73082900000000 -1.85359700000000 -0.80511500000000  
 H86 0.73856100000000 2.44515600000000 1.93004000000000  
 H90 1.40824800000000 -2.12803700000000 -1.59979500000000

**Start str II (Energy = -2502.910380 Hartrees, 4.60 Kcal mol<sup>-1</sup>)**

N1 1.65676000000000 1.41812300000000 -0.42524100000000  
 C2 3.88242300000000 1.62949900000000 -1.42491100000000  
 C3 2.08603800000000 3.25099400000000 -1.80830900000000  
 C4 3.22154900000000 2.49427800000000 -2.55299500000000  
 C5 0.98299600000000 2.21244600000000 -1.48645100000000  
 C6 3.01069000000000 1.98932200000000 -0.20271000000000  
 H7 4.92678800000000 1.91144700000000 -1.25676600000000  
 H8 2.83550200000000 1.88917200000000 -3.37880100000000



H9 0.7428480000000 1.6117080000000 -2.3692490000000  
H10 3.4062460000000 1.6953100000000 0.7705630000000  
H11 3.8490650000000 0.5570660000000 -1.6296600000000  
H12 1.7156460000000 4.1300080000000 -2.3413040000000  
H13 3.9320600000000 3.2105740000000 -2.9744720000000  
C14 2.7304770000000 3.4851240000000 -0.4234130000000  
H15 2.0562200000000 3.9176620000000 0.3205190000000  
H16 3.6413720000000 4.0876440000000 -0.4775530000000  
C17 -0.3299320000000 2.7376320000000 -0.9483010000000  
N18 -1.2378030000000 1.9422340000000 -0.4137170000000  
C19 -2.2793760000000 2.6574570000000 0.1820470000000  
C20 -2.1768480000000 4.0087100000000 0.0166620000000  
H21 -2.8493310000000 4.7669020000000 0.3906180000000  
P22 1.0105420000000 0.0361360000000 0.2815320000000  
Ir23 -1.0053380000000 -0.3312730000000 -0.7176350000000  
H24 -2.0350940000000 -0.4046790000000 0.8379400000000  
C25 0.8003410000000 0.4116240000000 2.0612850000000  
C26 0.1404700000000 0.9879630000000 4.7253460000000  
C27 0.7575860000000 1.7385860000000 2.5082620000000  
C28 0.5117090000000 -0.6275970000000 2.9604910000000  
C29 0.1835300000000 -0.3387350000000 4.2841510000000  
C30 0.4331850000000 2.0236010000000 3.8365270000000  
H31 0.5432190000000 -1.6618740000000 2.6267690000000  
H32 -0.0371150000000 -1.1486920000000 4.9734360000000  
H33 0.4031860000000 3.0557130000000 4.1739040000000  
H34 -0.1167490000000 1.2109010000000 5.7565850000000  
S35 -0.7328980000000 4.4165500000000 -0.8414080000000  
C36 -3.3440900000000 2.0089400000000 0.9802310000000  
C37 -3.0082180000000 1.3071520000000 2.1499110000000  
C38 -4.6937060000000 2.1656190000000 0.6380190000000  
C39 -4.0085810000000 0.7495740000000 2.9449170000000  
H40 -1.9674250000000 1.2266930000000 2.4480720000000  
C41 -5.6933040000000 1.6162240000000 1.4445690000000  
H42 -4.9576040000000 2.7168790000000 -0.2601600000000  
C43 -5.3534400000000 0.9011240000000 2.5950390000000  
H44 -3.7361920000000 0.2096850000000 3.8470910000000  
H45 -6.7364820000000 1.7436900000000 1.1706870000000  
H46 -6.1316380000000 0.4731560000000 3.2199770000000  
C47 2.2865260000000 -1.2585810000000 0.2011920000000  
C48 3.2865850000000 -1.3523020000000 1.1821610000000  
C49 2.3190040000000 -2.1206200000000 -0.9059820000000  
C50 4.3053940000000 -2.2961820000000 1.0539120000000  
H51 3.2651910000000 -0.6993540000000 2.0497330000000  
C52 3.3415170000000 -3.0601970000000 -1.0289950000000  
C53 4.3353870000000 -3.1500070000000 -0.0506630000000  
H54 5.0730880000000 -2.3663320000000 1.8188540000000  
H55 3.3585850000000 -3.7280820000000 -1.8852040000000  
H56 5.1275050000000 -3.8865220000000 -0.1463880000000  
H65 -1.6945090000000 -1.1381340000000 0.7675450000000  
C66 -3.9993950000000 -4.3872990000000 -0.6307170000000

C67 -3.4353280000000 -3.3156370000000 -1.3213380000000  
 C68 -3.7366100000000 -1.9921940000000 -0.9551470000000  
 C69 -4.6231650000000 -1.7893870000000 0.1190480000000  
 C70 -5.1833420000000 -2.8593880000000 0.8082860000000  
 C71 -4.8708050000000 -4.1685270000000 0.4371660000000  
 H72 -3.7560090000000 -5.4019420000000 -0.9328330000000  
 H73 -2.7682430000000 -3.5261390000000 -2.1435860000000  
 H74 -4.8644430000000 -0.7756490000000 0.4230910000000  
 H75 -5.8634810000000 -2.6704520000000 1.6342930000000  
 H76 -5.3044800000000 -5.0091820000000 0.9709350000000  
 C77 -3.2056080000000 -0.7630390000000 -1.5940540000000  
 H78 -3.7345010000000 0.1223690000000 -1.2527080000000  
 C79 -2.4255110000000 -0.5837050000000 -2.7329660000000  
 C80 -1.8331110000000 -1.6932060000000 -3.5823820000000  
 H81 -1.0906290000000 -1.2679310000000 -4.2609280000000  
 H82 -1.3475330000000 -2.4709560000000 -2.9993650000000  
 H83 -2.6296350000000 -2.1510120000000 -4.1838610000000  
 C84 -2.5357560000000 0.7136860000000 -3.5480310000000  
 O85 -1.2143620000000 1.2054020000000 -3.8123850000000  
 H86 -1.2668350000000 1.7828310000000 -4.5851860000000  
 H87 -0.1776070000000 -0.1137740000000 -2.0373510000000  
 H88 -0.7038860000000 -1.8542280000000 -0.9637390000000  
 H89 -2.9739270000000 0.3607390000000 -4.4986110000000  
 C90 -3.4405170000000 1.8248730000000 -3.0264770000000  
 H91 -4.4711700000000 1.4786770000000 -2.9080980000000  
 H92 -3.0852050000000 2.2248180000000 -2.0792360000000  
 H93 -3.4521950000000 2.6437860000000 -3.7532680000000  
 H90 1.5412810000000 -2.0546890000000 -1.6604700000000  
 H94 0.9633670000000 2.5469430000000 1.8145180000000

**Start str III (Energy = -2502,909701 Hartrees, 5.02 Kcal mol<sup>-1</sup>)**

N1 1.6811690000000 1.4357110000000 -0.3236960000000  
 C2 4.0126200000000 1.5789630000000 -1.0893700000000  
 C3 2.2894960000000 3.1956740000000 -1.7333780000000  
 C4 3.4901300000000 2.4005160000000 -2.3167680000000  
 C5 1.1422690000000 2.1829630000000 -1.4833840000000  
 C6 3.0166500000000 1.9967680000000 0.0135590000000  
 H7 5.0348500000000 1.8610630000000 -0.8175610000000  
 H8 3.1924090000000 1.7652090000000 -3.1565920000000  
 H9 1.0086800000000 1.5353760000000 -2.3579640000000  
 H10 3.2967050000000 1.7431600000000 1.0370770000000  
 H11 3.9928380000000 0.4996650000000 -1.2539900000000  
 H12 1.9912430000000 4.0535290000000 -2.3405300000000  
 H13 4.2497010000000 3.0947940000000 -2.6858170000000  
 C14 2.7780320000000 3.4832620000000 -0.2958700000000  
 H15 2.0272500000000 3.9447640000000 0.3515470000000  
 H16 3.6944270000000 4.0790310000000 -0.2714690000000  
 C17 -0.2118600000000 2.7656850000000 -1.1261470000000  
 N18 -1.1875590000000 2.0422990000000 -0.6096610000000  
 C19 -2.2789040000000 2.8232290000000 -0.2260330000000

C20 -2.1429500000000 4.1443050000000 -0.5402070000000  
 H21 -2.8401430000000 4.9427960000000 -0.3291580000000  
 P22 1.0014250000000 0.0264660000000 0.2938920000000  
 Ir23 -1.0396320000000 -0.2616640000000 -0.6867800000000  
 H24 -1.9908950000000 -0.1607960000000 0.9002490000000  
 C25 0.8330420000000 0.3294930000000 2.0870570000000  
 C26 0.2554350000000 0.7942630000000 4.7868320000000  
 C27 0.6561080000000 1.6387650000000 2.5558990000000  
 C28 0.7135840000000 -0.7475050000000 2.9792130000000  
 C29 0.4263600000000 -0.5126590000000 4.3231270000000  
 C30 0.3728730000000 1.8685750000000 3.9028520000000  
 H31 0.8496240000000 -1.7665390000000 2.6270860000000  
 H32 0.3396890000000 -1.3497080000000 5.0098480000000  
 H33 0.2443830000000 2.8857630000000 4.2617920000000  
 H34 0.0341940000000 0.9740750000000 5.8348930000000  
 S35 -0.6033580000000 4.4466310000000 -1.2672380000000  
 C36 -3.3997560000000 2.2613720000000 0.5599270000000  
 C37 -3.1356630000000 1.7373390000000 1.8361200000000  
 C38 -4.7167760000000 2.2920800000000 0.0859150000000  
 C39 -4.1751670000000 1.2307270000000 2.6146550000000  
 H40 -2.1193460000000 1.7475070000000 2.2210990000000  
 C41 -5.7551600000000 1.7831460000000 0.8683630000000  
 H42 -4.9252190000000 2.6987220000000 -0.8994580000000  
 C43 -5.4862550000000 1.2496000000000 2.1298310000000  
 H44 -3.9627010000000 0.8306800000000 3.6021070000000  
 H45 -6.7727650000000 1.7993980000000 0.4903110000000  
 H46 -6.2961680000000 0.8545930000000 2.7362850000000  
 C47 2.2251730000000 -1.3141230000000 0.1425790000000  
 C48 3.2979850000000 -1.4051160000000 1.0459910000000  
 C49 2.1488000000000 -2.2113000000000 -0.9330770000000  
 C50 4.2769110000000 -2.3814620000000 0.8736300000000  
 H51 3.3620270000000 -0.7252250000000 1.8905160000000  
 C52 3.1320890000000 -3.1857630000000 -1.1002310000000  
 C53 4.1945640000000 -3.2723990000000 -0.1988770000000  
 H54 5.1000620000000 -2.4499340000000 1.5787500000000  
 H55 3.0642150000000 -3.8825720000000 -1.9303160000000  
 H56 4.9559460000000 -4.0359020000000 -0.3283970000000  
 H65 -1.7096210000000 -0.9256210000000 0.8716240000000  
 C66 -3.8231020000000 -4.6044830000000 -0.6361930000000  
 C67 -3.4529860000000 -3.4429500000000 -1.3125680000000  
 C68 -3.6533650000000 -2.1803350000000 -0.7279990000000  
 C69 -4.2601770000000 -2.1281300000000 0.5422810000000  
 C70 -4.6251020000000 -3.2878040000000 1.2176370000000  
 C71 -4.3998730000000 -4.5359730000000 0.6322730000000  
 H72 -3.6654950000000 -5.5697220000000 -1.1089300000000  
 H73 -3.0352620000000 -3.5342760000000 -2.3045120000000  
 H74 -4.4398300000000 -1.1602100000000 1.0041360000000  
 H75 -5.0890400000000 -3.2197870000000 2.1978260000000  
 H76 -4.6827160000000 -5.4453110000000 1.1548390000000  
 C77 -3.3076190000000 -0.8760450000000 -1.3406290000000

H78 -3.8696260000000 -0.0561280000000 -0.8980860000000  
 C79 -2.6464890000000 -0.5465930000000 -2.5200800000000  
 C80 -2.0905940000000 -1.5431230000000 -3.5115530000000  
 H81 -1.3410320000000 -1.0800340000000 -4.1551940000000  
 H82 -1.6175660000000 -2.3920260000000 -3.0232890000000  
 H83 -2.9078950000000 -1.8997950000000 -4.1493580000000  
 C84 -3.0116230000000 0.8259510000000 -3.1030750000000  
 O85 -4.2138720000000 0.5587940000000 -3.8341790000000  
 H86 -4.3739520000000 1.2923040000000 -4.4426550000000  
 H87 -0.2467450000000 -0.1559620000000 -2.0480340000000  
 H88 -0.8074960000000 -1.8085900000000 -0.8423160000000  
 H89 -3.2299400000000 1.5018670000000 -2.2664040000000  
 C90 -1.9615590000000 1.4834390000000 -3.9959340000000  
 H91 -1.0056050000000 1.5792800000000 -3.4785540000000  
 H92 -1.8085610000000 0.9094610000000 -4.9136530000000  
 H93 -2.2939840000000 2.4889610000000 -4.2788300000000  
 H90 1.3180910000000 -2.1477270000000 -1.6280820000000  
 H94 0.7345570000000 2.4719830000000 1.8645330000000

**TSI (Energy = -2502.895853 Hartrees, 13.71 Kcal mol<sup>-1</sup>)**

N1 1.6347230000000 1.5455950000000 -0.2709460000000  
 C2 3.8664670000000 1.8096280000000 -1.2935230000000  
 C3 1.9645650000000 3.2455700000000 -1.8416950000000  
 C4 3.1578270000000 2.5053500000000 -2.5036890000000  
 C5 0.9294490000000 2.1715490000000 -1.4150560000000  
 C6 2.9530280000000 2.2170370000000 -0.1161730000000  
 H7 4.8814290000000 2.1916040000000 -1.1433290000000  
 H8 2.8251870000000 1.7940400000000 -3.2658270000000  
 H9 0.7487230000000 1.4701150000000 -2.2368300000000  
 H10 3.3549990000000 2.0488080000000 0.8840620000000  
 H11 3.9284630000000 0.7254400000000 -1.3996610000000  
 H12 1.5439740000000 4.0395390000000 -2.4628610000000  
 H13 3.8179570000000 3.2262700000000 -2.9935430000000  
 C14 2.5666120000000 3.6594440000000 -0.4800880000000  
 H15 1.8452110000000 4.0991150000000 0.2146470000000  
 H16 3.4293130000000 4.3234710000000 -0.5803920000000  
 C17 -0.4290140000000 2.6968860000000 -0.9882120000000  
 N18 -1.3339890000000 1.9739410000000 -0.3548170000000  
 C19 -2.4935350000000 2.7006350000000 -0.0730290000000  
 C20 -2.4678880000000 3.9784490000000 -0.5520350000000  
 H21 -3.2302130000000 4.7356730000000 -0.4369740000000  
 P22 1.1595840000000 0.0761070000000 0.4008860000000  
 Ir23 -1.0806630000000 -0.3056600000000 -0.1987550000000  
 H24 -2.0843740000000 -0.4389740000000 1.1439700000000  
 C25 1.3593830000000 0.3241060000000 2.2012840000000  
 C26 1.3120040000000 0.6840750000000 4.9832730000000  
 C27 1.1295960000000 1.5959200000000 2.7476280000000  
 C28 1.5572740000000 -0.7678290000000 3.0605710000000  
 C29 1.5340320000000 -0.5849630000000 4.4438770000000  
 C30 1.1112440000000 1.7733710000000 4.1315770000000

H31 1.73140200000000 -1.75942500000000 2.65306500000000  
H32 1.69139800000000 -1.43604900000000 5.10014300000000  
H33 0.93991300000000 2.76324300000000 4.54494400000000  
H34 1.29428800000000 0.82283500000000 6.06000900000000  
S35 -0.96222900000000 4.30981400000000 -1.33137800000000  
C36 -3.61041200000000 2.11965400000000 0.69844400000000  
C37 -3.39060600000000 1.60266700000000 1.98381000000000  
C38 -4.90637100000000 2.11101000000000 0.16550000000000  
C39 -4.44737000000000 1.05606700000000 2.70888400000000  
H40 -2.39383200000000 1.64696100000000 2.41395300000000  
C41 -5.96328300000000 1.56756200000000 0.89622400000000  
H42 -5.07796800000000 2.51611800000000 -0.82829700000000  
C43 -5.73333300000000 1.03120800000000 2.16337600000000  
H44 -4.27071900000000 0.65821900000000 3.70377500000000  
H45 -6.96357800000000 1.55877900000000 0.47359100000000  
H46 -6.55453600000000 0.60153800000000 2.72882500000000  
C47 2.37419500000000 -1.21307200000000 -0.04803700000000  
C48 3.63253900000000 -1.27671800000000 0.57334400000000  
C49 2.07824400000000 -2.09613700000000 -1.09557600000000  
C50 4.57490900000000 -2.21161600000000 0.15089700000000  
H51 3.87188100000000 -0.60475200000000 1.39229500000000  
C52 3.02556000000000 -3.02832500000000 -1.51757500000000  
C53 4.27282500000000 -3.08743600000000 -0.89469400000000  
H54 5.54372000000000 -2.25957000000000 0.63924800000000  
H55 2.78747900000000 -3.71218400000000 -2.32705600000000  
H56 5.00820400000000 -3.81751600000000 -1.21958200000000  
H65 -1.23154100000000 -0.38448600000000 1.48097000000000  
C66 -3.98375000000000 -4.36771400000000 -0.59199600000000  
C67 -3.16775000000000 -3.26815800000000 -0.84784900000000  
C68 -3.71117400000000 -1.97689000000000 -0.96324200000000  
C69 -5.09754100000000 -1.83067100000000 -0.78367900000000  
C70 -5.91394100000000 -2.93053000000000 -0.52234300000000  
C71 -5.36183900000000 -4.20814800000000 -0.43245800000000  
H72 -3.53786300000000 -5.35480400000000 -0.50867300000000  
H73 -2.09745500000000 -3.41503200000000 -0.92967900000000  
H74 -5.53807600000000 -0.83816100000000 -0.84215900000000  
H75 -6.98262100000000 -2.78686700000000 -0.38967100000000  
H76 -5.99397600000000 -5.06748700000000 -0.23115100000000  
C77 -2.93342200000000 -0.74143900000000 -1.27232000000000  
H78 -3.56499100000000 0.14035600000000 -1.17546000000000  
C79 -1.97126400000000 -0.61562200000000 -2.37706500000000  
C80 -1.56638800000000 -1.83680500000000 -3.20144300000000  
H81 -0.89346500000000 -1.53271500000000 -4.00601300000000  
H82 -1.06975900000000 -2.58972500000000 -2.59303300000000  
H83 -2.46314300000000 -2.29460000000000 -3.62904200000000  
C84 -2.18104700000000 0.65734300000000 -3.21778700000000  
H85 -2.48838000000000 1.46367500000000 -2.54016100000000  
C86 -3.28019700000000 0.44278600000000 -4.26072200000000  
H87 -4.21115000000000 0.12142800000000 -3.78413600000000  
H88 -3.48084600000000 1.38102800000000 -4.78946700000000

H89 -2.9845780000000 -0.3090300000000 -4.9964200000000  
O90 -0.9295590000000 0.9838410000000 -3.8223250000000  
H91 -1.0828030000000 1.6256990000000 -4.5271450000000  
H92 -0.7336250000000 -0.3133770000000 -1.8849940000000  
H93 -0.8386750000000 -1.8540570000000 -0.1266520000000  
H86 0.9598010000000 2.4406800000000 2.0862840000000  
H90 1.1039980000000 -2.0555700000000 -1.5727940000000

**TSII (Energy = -2502.89109 Hartrees, 16.70 Kcal mol<sup>-1</sup>)**

N1 1.6093260000000 1.5855550000000 -0.3250610000000  
C2 3.7532660000000 1.8228080000000 -1.5202360000000  
C3 1.8623520000000 3.3406110000000 -1.8488330000000  
C4 2.9724680000000 2.5939210000000 -2.6374470000000  
C5 0.8334370000000 2.2787370000000 -1.3849460000000  
C6 2.9564880000000 2.2096800000000 -0.2540420000000  
H7 4.7911690000000 2.1623050000000 -1.4422730000000  
H8 2.5541340000000 1.9262140000000 -3.3969810000000  
H9 0.5709170000000 1.6094620000000 -2.2136060000000  
H10 3.4340940000000 1.9880650000000 0.7016450000000  
H11 3.7640720000000 0.7425340000000 -1.6738960000000  
H12 1.4153800000000 4.1724100000000 -2.3979980000000  
H13 3.6148690000000 3.3149350000000 -3.1502620000000  
C14 2.5918880000000 3.6772660000000 -0.5277180000000  
H15 1.9509360000000 4.1110400000000 0.2448110000000  
H16 3.4663120000000 4.3164660000000 -0.6768320000000  
C17 -0.4722240000000 2.8021090000000 -0.8240430000000  
N18 -1.3986380000000 2.0150890000000 -0.3072590000000  
C19 -2.5123570000000 2.7289580000000 0.1418420000000  
C20 -2.4211740000000 4.0728600000000 -0.0721320000000  
H21 -3.1475570000000 4.8279270000000 0.1929300000000  
P22 1.1378890000000 0.1083420000000 0.3299670000000  
Ir23 -1.1165700000000 -0.2558560000000 -0.2287770000000  
H24 -2.1336900000000 -0.3348910000000 1.1091090000000  
C25 1.4029110000000 0.3014160000000 2.1260240000000  
C26 1.4670440000000 0.5787630000000 4.9117800000000  
C27 1.2500920000000 1.5652950000000 2.7140060000000  
C28 1.5815030000000 -0.8246970000000 2.9446000000000  
C29 1.6137660000000 -0.6829250000000 4.3315070000000  
C30 1.2870010000000 1.7014930000000 4.1017410000000  
H31 1.6987010000000 -1.8093650000000 2.5008550000000  
H32 1.7553050000000 -1.5583580000000 4.9583940000000  
H33 1.1755980000000 2.6842330000000 4.5506400000000  
H34 1.4925000000000 0.6857130000000 5.9921120000000  
S35 -0.9163830000000 4.4757400000000 -0.8206540000000  
C36 -3.6679220000000 2.0582040000000 0.7817780000000  
C37 -3.5558530000000 1.5324170000000 2.0767510000000  
C38 -4.8863520000000 1.9520910000000 0.0993620000000  
C39 -4.6363140000000 0.8737470000000 2.6617750000000  
H40 -2.6224790000000 1.6455790000000 2.6224350000000  
C41 -5.9660900000000 1.2919710000000 0.6870190000000

H42 -4.9786430000000 2.3751070000000 -0.8974760000000  
 C43 -5.8391460000000 0.7439530000000 1.9633230000000  
 H44 -4.5420520000000 0.4660380000000 3.6639550000000  
 H45 -6.9037410000000 1.2017150000000 0.1466280000000  
 H46 -6.6767140000000 0.2221240000000 2.4163300000000  
 C47 2.3326610000000 -1.1731760000000 -0.1870860000000  
 C48 3.6090550000000 -1.2465610000000 0.3958820000000  
 C49 2.0089060000000 -2.0370160000000 -1.2422960000000  
 C50 4.5428850000000 -2.1668140000000 -0.0751730000000  
 H51 3.8694060000000 -0.5938940000000 1.2240990000000  
 C52 2.9471380000000 -2.9555380000000 -1.7122970000000  
 C53 4.2141590000000 -3.0204120000000 -1.1310890000000  
 H54 5.5259940000000 -2.2203270000000 0.3832320000000  
 H55 2.6864890000000 -3.6236550000000 -2.5280660000000  
 H56 4.9431080000000 -3.7386300000000 -1.4949540000000  
 H65 -1.2851450000000 -0.2136640000000 1.4506260000000  
 C66 -4.3123360000000 -4.0619740000000 -0.0424000000000  
 C67 -3.4090660000000 -3.0407030000000 -0.3316030000000  
 C68 -3.8379090000000 -1.8498680000000 -0.9377890000000  
 C69 -5.2069760000000 -1.7119450000000 -1.2209340000000  
 C70 -6.1130710000000 -2.7303600000000 -0.9287890000000  
 C71 -5.6674880000000 -3.9141960000000 -0.3411940000000  
 H72 -3.9553820000000 -4.9750560000000 0.4255100000000  
 H73 -2.3662740000000 -3.1617020000000 -0.0625200000000  
 H74 -5.5655290000000 -0.7916380000000 -1.6757130000000  
 H75 -7.1663930000000 -2.5981640000000 -1.1604690000000  
 H76 -6.3692790000000 -4.7107230000000 -0.1118340000000  
 C77 -2.9499280000000 -0.7076550000000 -1.3268310000000  
 H78 -3.5194700000000 0.2149940000000 -1.3703060000000  
 C79 -1.9342150000000 -0.8167680000000 -2.3823050000000  
 C80 -1.5450980000000 -2.2054750000000 -2.8886390000000  
 H81 -0.6875930000000 -2.1343430000000 -3.5618700000000  
 H82 -1.3114710000000 -2.8892940000000 -2.0767150000000  
 H83 -2.3953150000000 -2.6192280000000 -3.4416950000000  
 C84 -1.9575580000000 0.1914930000000 -3.5573660000000  
 O85 -0.5871740000000 0.4374980000000 -3.8947810000000  
 H86 -0.5524040000000 0.8661940000000 -4.7595730000000  
 H87 -0.7137910000000 -0.3902760000000 -1.8863820000000  
 H88 -0.8492510000000 -1.7954660000000 -0.0825430000000  
 H89 -2.4379880000000 -0.3737920000000 -4.3722410000000  
 C90 -2.7296310000000 1.4923510000000 -3.3716880000000  
 H91 -3.7986720000000 1.3040610000000 -3.2401540000000  
 H92 -2.3636380000000 2.0621070000000 -2.5196750000000  
 H93 -2.6155610000000 2.1066710000000 -4.2709250000000  
 H90 1.0219410000000 -1.9942170000000 -1.6897130000000  
 H94 1.0992130000000 2.4356310000000 2.0823280000000  
  
**TSIII (Energy = -2502.88825 Hartrees) 18.48 Kcal mol<sup>-1</sup>)**  
 N1 1.7501570000000 1.6705870000000 -0.2037080000000  
 C2 3.9921490000000 1.9701990000000 -1.2002700000000  
 C3 2.0708350000000 3.3601380000000 -1.7933630000000

C4 3.2903820000000 2.6406240000000 -2.4281470000000  
C5 1.0541980000000 2.2695690000000 -1.3674380000000  
C6 3.0527210000000 2.3713780000000 -0.0403230000000  
H7 4.9972580000000 2.3729810000000 -1.0385690000000  
H8 2.9874150000000 1.9161280000000 -3.1911170000000  
H9 0.9187440000000 1.5414790000000 -2.1763520000000  
H10 3.4434830000000 2.2243110000000 0.9676810000000  
H11 4.0771890000000 0.8867040000000 -1.2954060000000  
H12 1.6391170000000 4.1369820000000 -2.4285020000000  
H13 3.9424240000000 3.3713230000000 -2.9142870000000  
C14 2.6429280000000 3.8010660000000 -0.4269300000000  
H15 1.9031840000000 4.2337930000000 0.2522030000000  
H16 3.4930850000000 4.4817010000000 -0.5237600000000  
C17 -0.3264380000000 2.7635730000000 -0.9813210000000  
N18 -1.2385180000000 1.9913220000000 -0.4226750000000  
C19 -2.4138630000000 2.6856580000000 -0.1228380000000  
C20 -2.3873090000000 3.9926130000000 -0.5134720000000  
H21 -3.1647770000000 4.7314730000000 -0.3793590000000  
P22 1.2973790000000 0.1953360000000 0.4858330000000  
Ir23 -0.9032860000000 -0.2569320000000 -0.1919010000000  
H24 -1.9874870000000 -0.2502860000000 1.1097570000000  
C25 1.4557870000000 0.4819590000000 2.2849660000000  
C26 1.3526240000000 0.8801910000000 5.0574980000000  
C27 1.1551940000000 1.7489560000000 2.8066890000000  
C28 1.6971270000000 -0.5863090000000 3.1618490000000  
C29 1.6460530000000 -0.3842060000000 4.5416340000000  
C30 1.1087640000000 1.9457000000000 4.1870130000000  
H31 1.9275310000000 -1.5732590000000 2.7711710000000  
H32 1.8380010000000 -1.2158810000000 5.2133540000000  
H33 0.8835450000000 2.9315800000000 4.5836500000000  
H34 1.3141960000000 1.0342620000000 6.1317180000000  
S35 -0.8661770000000 4.3907010000000 -1.2313330000000  
C36 -3.5371440000000 2.0449100000000 0.5985340000000  
C37 -3.3708230000000 1.6510860000000 1.9347190000000  
C38 -4.7642770000000 1.8226450000000 -0.0374490000000  
C39 -4.4078840000000 1.0117310000000 2.6114260000000  
H40 -2.4290270000000 1.8522650000000 2.4390790000000  
C41 -5.7990720000000 1.1773140000000 0.6406900000000  
H42 -4.8976040000000 2.1336100000000 -1.0701620000000  
C43 -5.6193140000000 0.7641390000000 1.9609620000000  
H44 -4.2729440000000 0.7095500000000 3.6460250000000  
H45 -6.7409110000000 0.9894560000000 0.1343220000000  
H46 -6.4227740000000 0.2548380000000 2.4848050000000  
C47 2.5654460000000 -1.0597270000000 0.0867400000000  
C48 3.8303610000000 -1.0303640000000 0.6984130000000  
C49 2.3030040000000 -2.0155390000000 -0.9043380000000  
C50 4.8142320000000 -1.9393230000000 0.3162240000000  
H51 4.0431840000000 -0.3045070000000 1.4780230000000  
C52 3.2914350000000 -2.9223810000000 -1.2859030000000  
C53 4.5463130000000 -2.8850300000000 -0.6772220000000



H54 5.78859700000000 -1.91341500000000 0.79530200000000  
 H55 3.07807700000000 -3.66379600000000 -2.05051700000000  
 H56 5.31401200000000 -3.59500200000000 -0.97090700000000  
 H65 -1.16303300000000 -0.20019100000000 1.48461500000000  
 C66 -5.51799100000000 -3.17478500000000 -1.71792500000000  
 C67 -4.59828900000000 -2.15556200000000 -1.95350300000000  
 C68 -3.61947800000000 -1.83538000000000 -0.99661200000000  
 C69 -3.59287100000000 -2.55452700000000 0.20186700000000  
 C70 -4.51691700000000 -3.57485200000000 0.43968300000000  
 C71 -5.48018800000000 -3.88899700000000 -0.51800900000000  
 H72 -6.26538400000000 -3.41219600000000 -2.47026300000000  
 H73 -4.62370700000000 -1.59559200000000 -2.88517400000000  
 H74 -2.84155300000000 -2.32584100000000 0.94961400000000  
 H75 -4.47963300000000 -4.12580400000000 1.37558200000000  
 H76 -6.19614900000000 -4.68491000000000 -0.33282200000000  
 C77 -2.70524500000000 -0.69214800000000 -1.33446600000000  
 H78 -3.25397500000000 0.24247000000000 -1.43360800000000  
 C79 -1.67345800000000 -0.85050100000000 -2.35310800000000  
 C80 -1.33752000000000 -2.25288100000000 -2.83312500000000  
 H81 -0.32415400000000 -2.32213600000000 -3.23622500000000  
 H82 -1.45147600000000 -2.97609100000000 -2.02604800000000  
 H83 -2.04623800000000 -2.50543800000000 -3.62775400000000  
 C84 -1.67564500000000 0.24139900000000 -3.44419500000000  
 O85 -2.89438100000000 -0.00267200000000 -4.14295000000000  
 H86 -2.88717600000000 0.49939300000000 -4.96846000000000  
 H87 -0.40121500000000 -0.46076200000000 -1.78913300000000  
 H88 -0.66964300000000 -1.80111100000000 0.00414500000000  
 H89 -1.71718900000000 1.21682300000000 -2.93660900000000  
 C90 -0.47477200000000 0.20512200000000 -4.38889900000000  
 H91 0.47563600000000 0.23854200000000 -3.84524000000000  
 H92 -0.49006200000000 -0.70450100000000 -4.99518200000000  
 H93 -0.49845800000000 1.06664700000000 -5.06523500000000  
 H90 1.32082200000000 -2.05772500000000 -1.36367000000000  
 H94 0.95651600000000 2.57476900000000 2.12973900000000

## References

- [1] Jaguar, version 7.9, Schrodinger, LLC, New York, NY, 2011.
- [2] (a) Becke, A. D. *J. Chem. Phys.* **1993**, 98, 5648–5652. (b) Lee, C.; Yang, W.; Parr, R. G. *Phys. Rev. B.* **1988**, 37, 785–789.
- [3] Grimme, S.; Antony, J.; Ehrlich, S.; Krieg, H. *J. Chem. Phys.* **2010**, 132, 154104.
- [4] Hay, P. J.; Wadt, W. R. *J. Chem. Phys.* **1985**, 82, 270–283.

## 7. SFC and GC Chromatograms

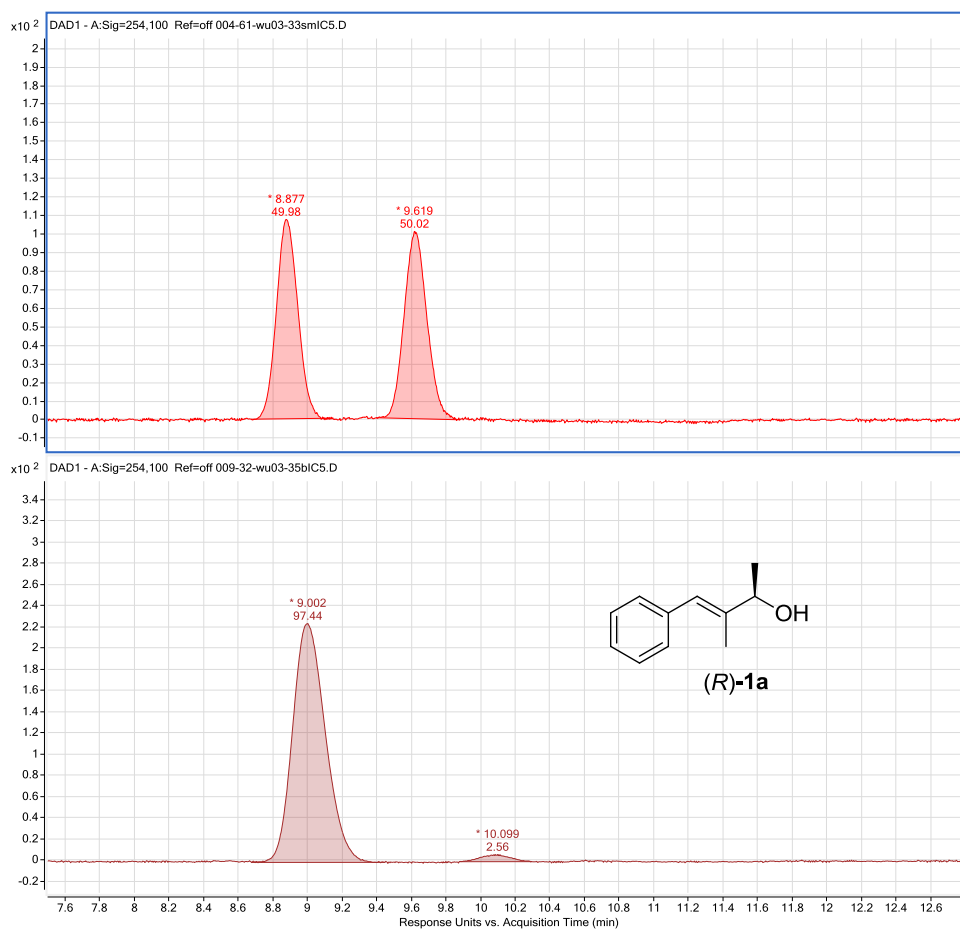

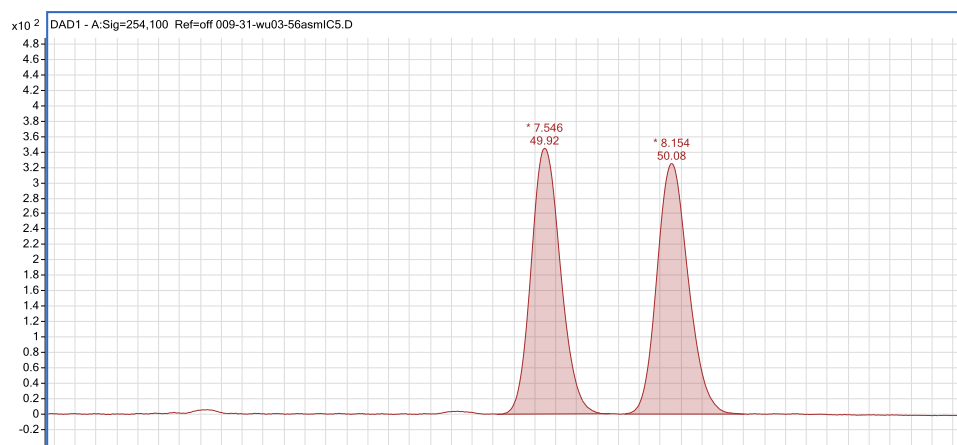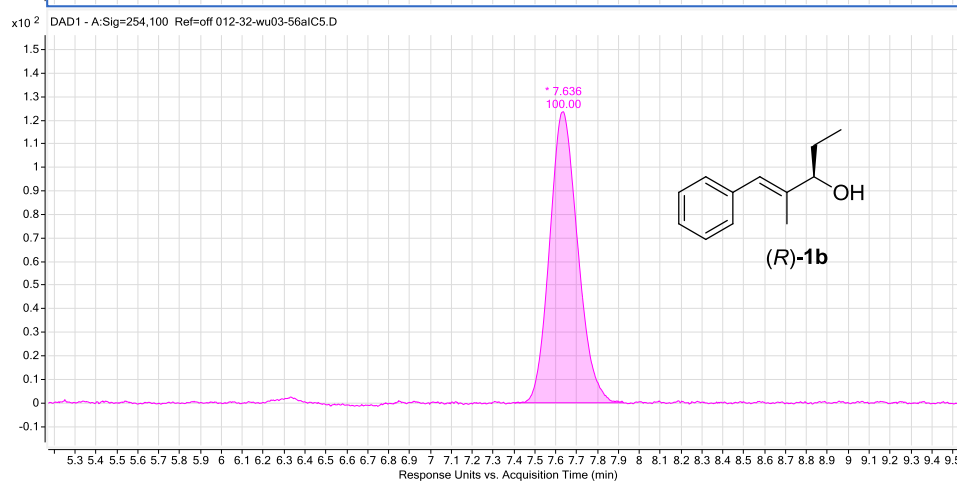

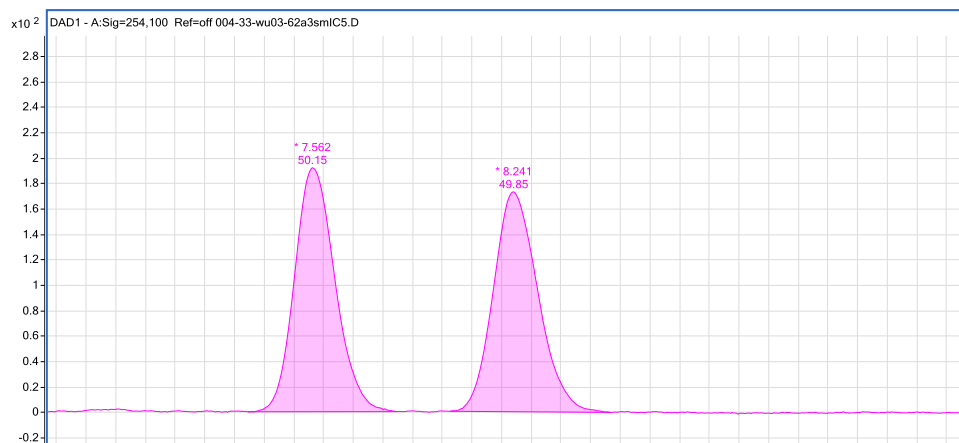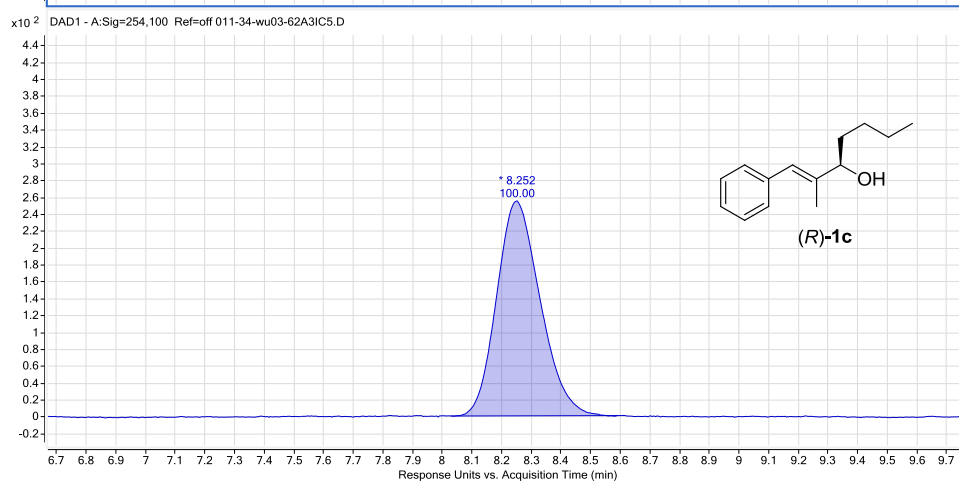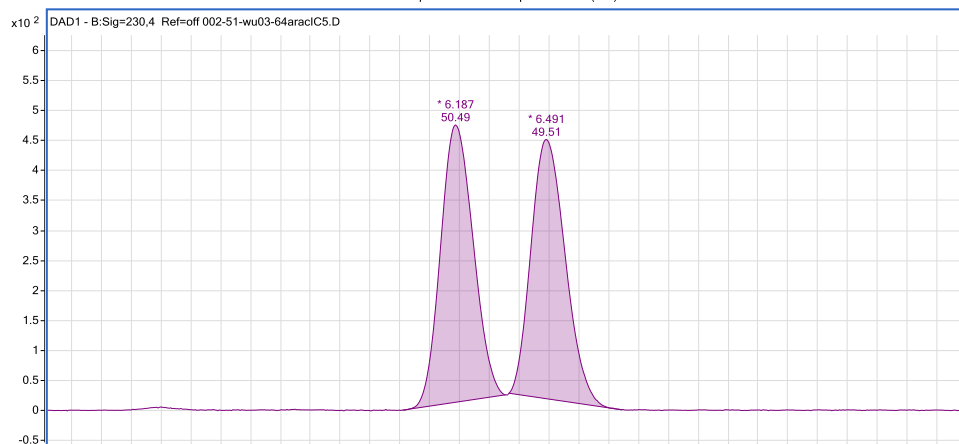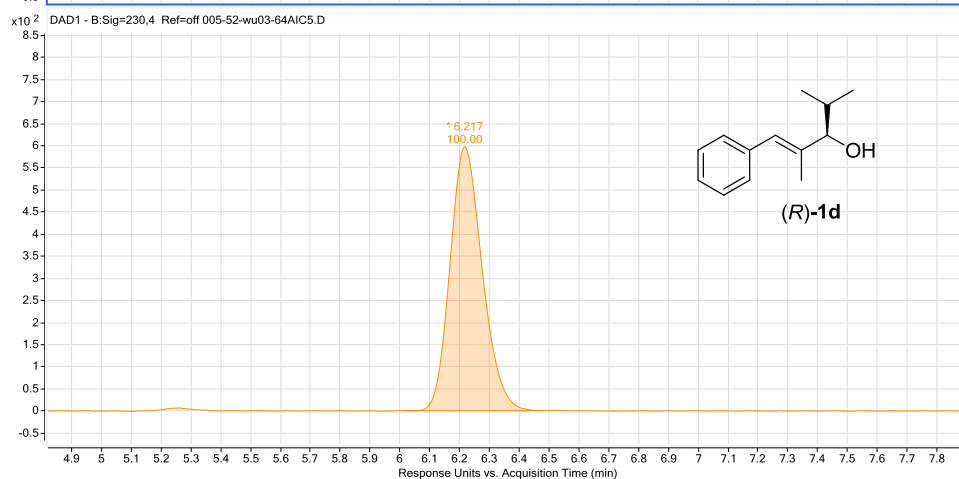

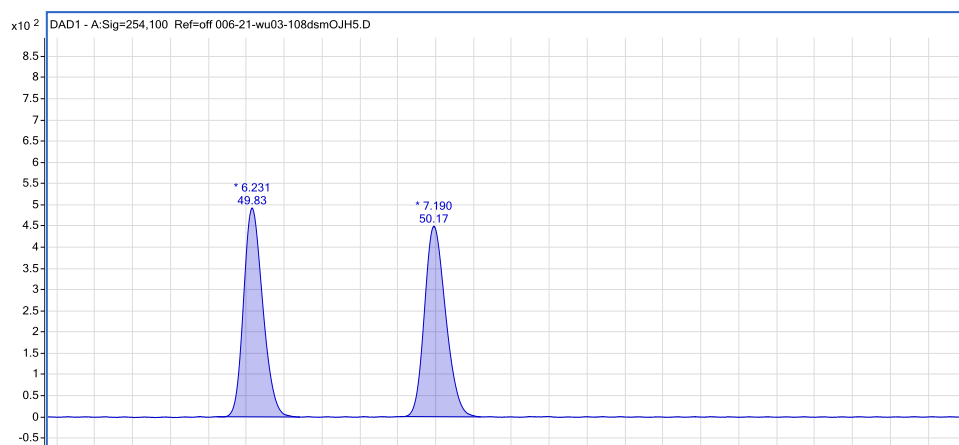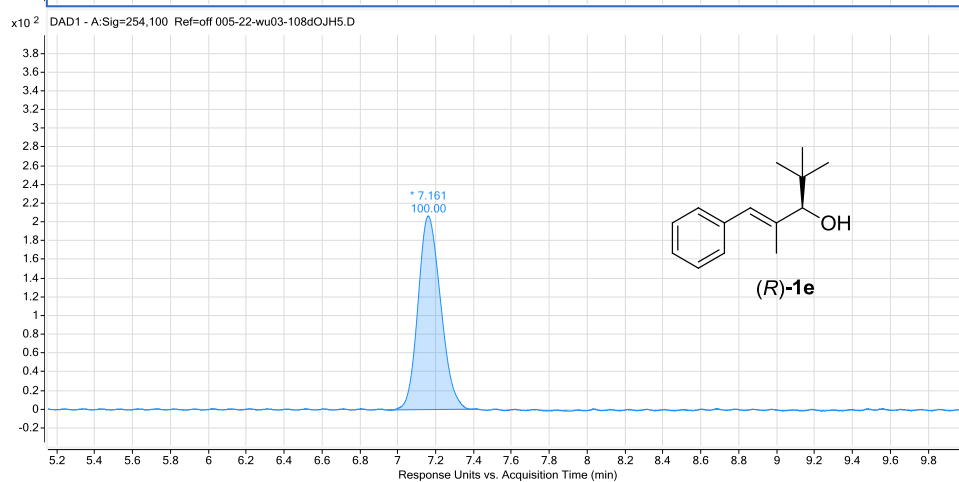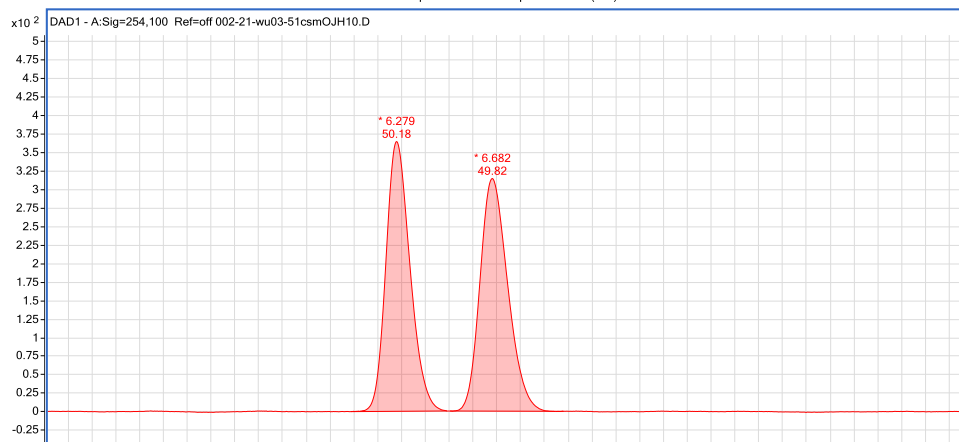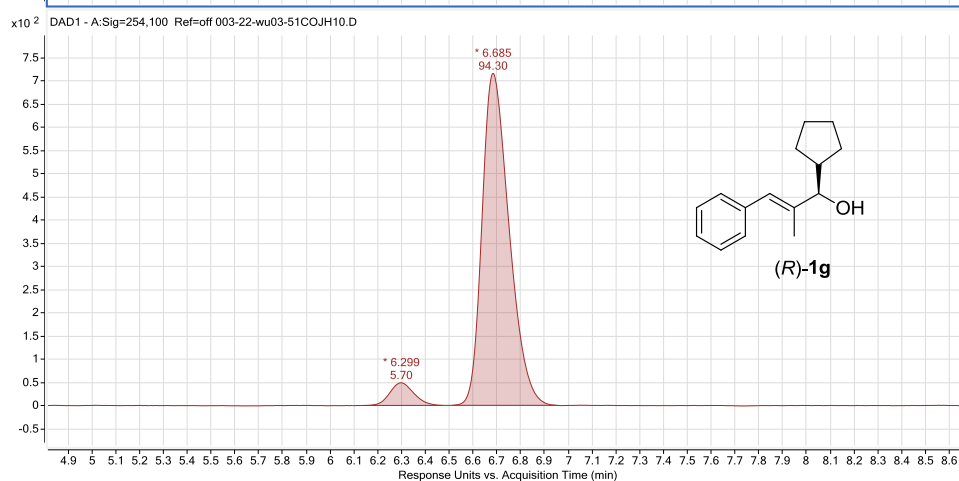

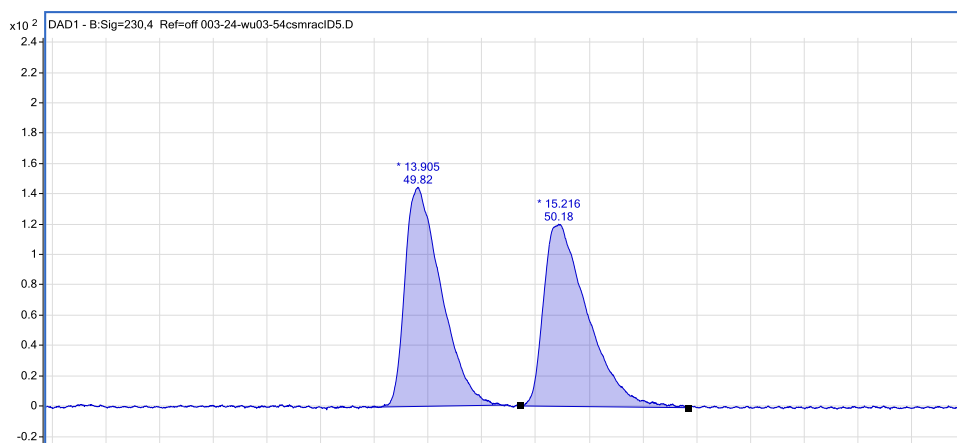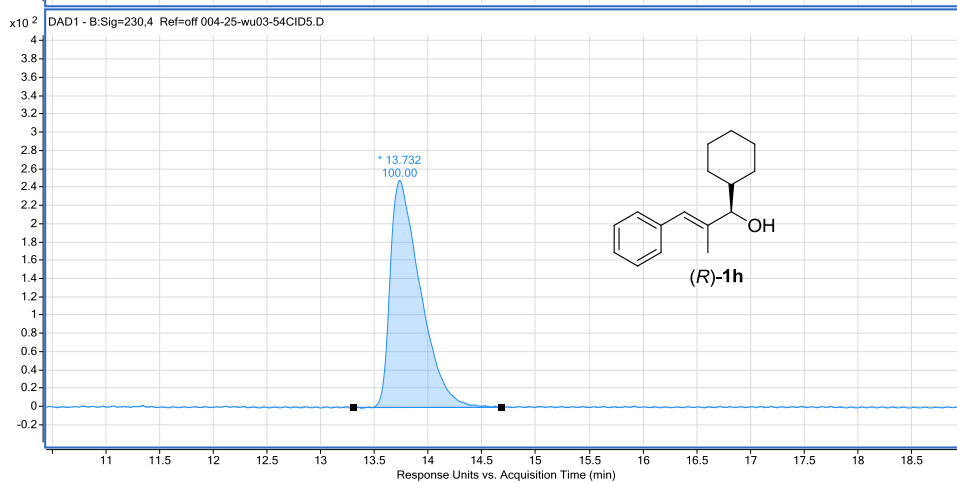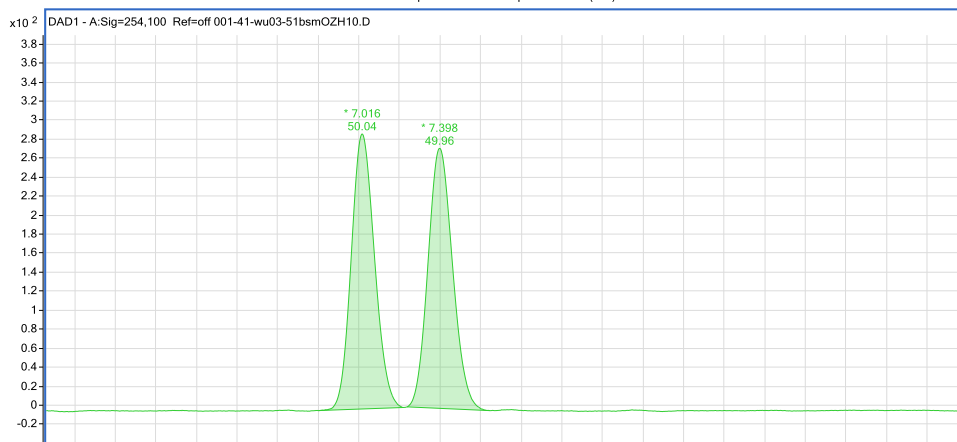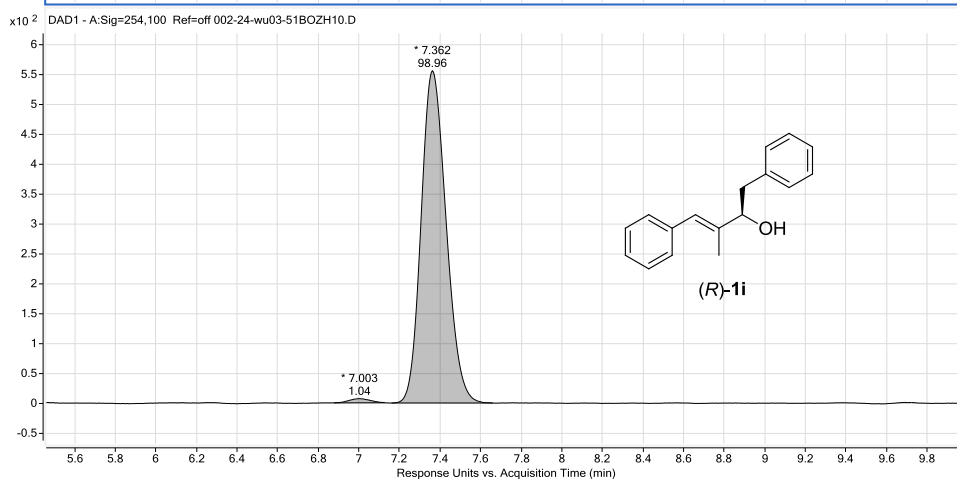

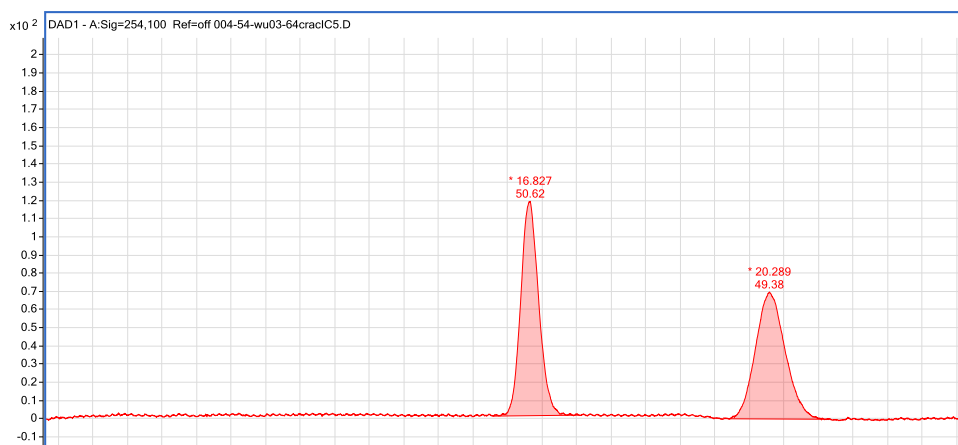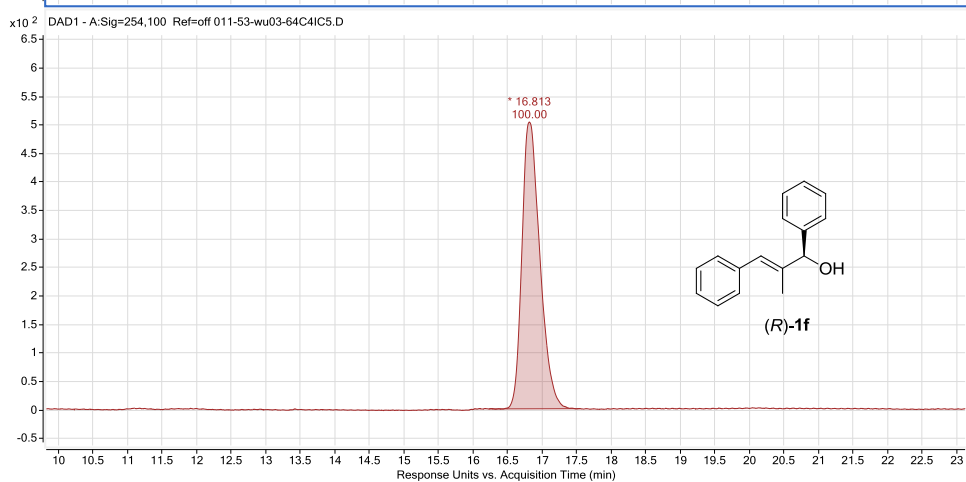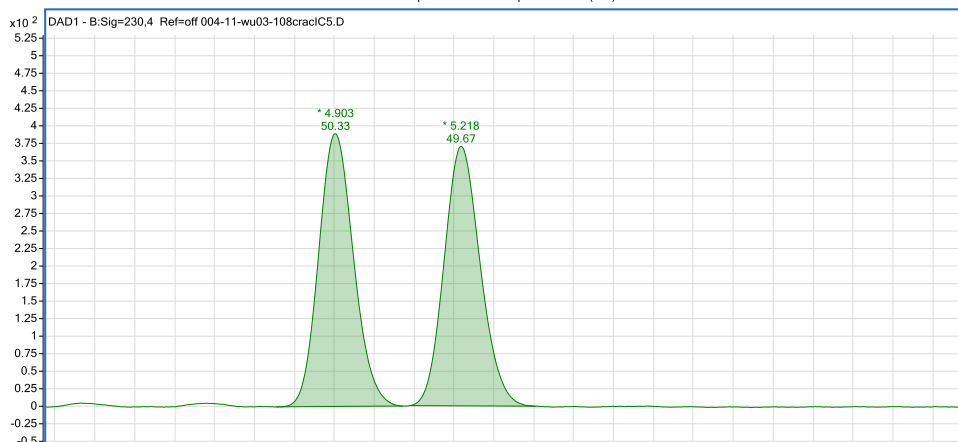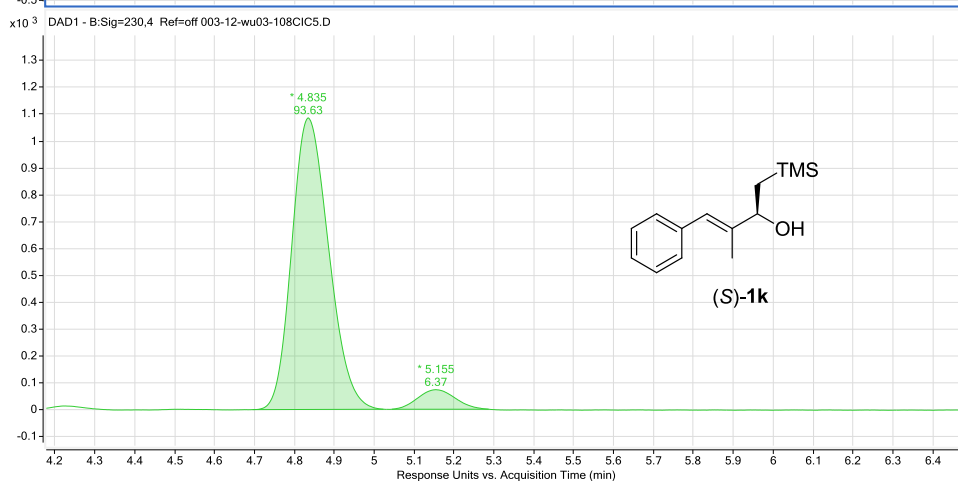

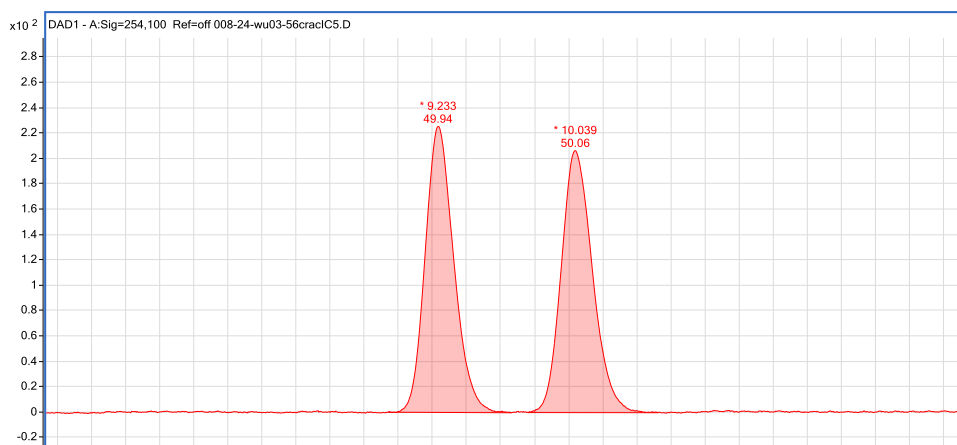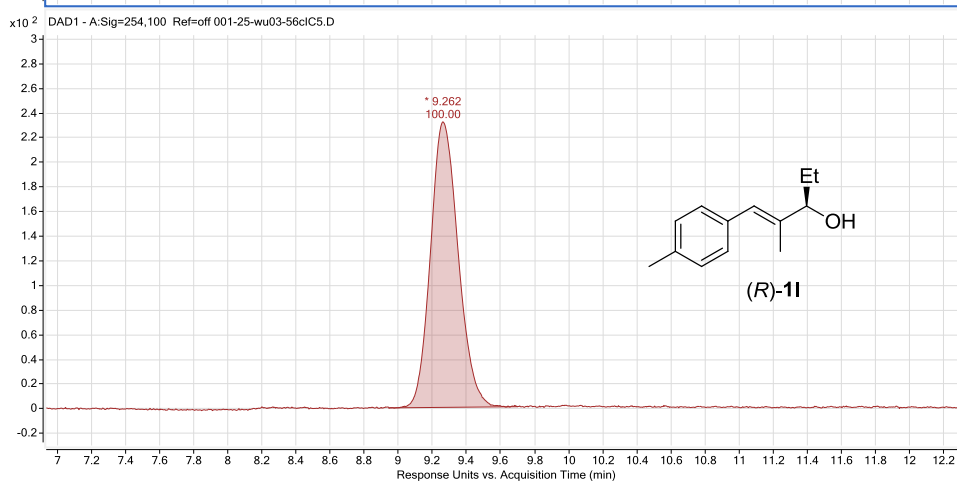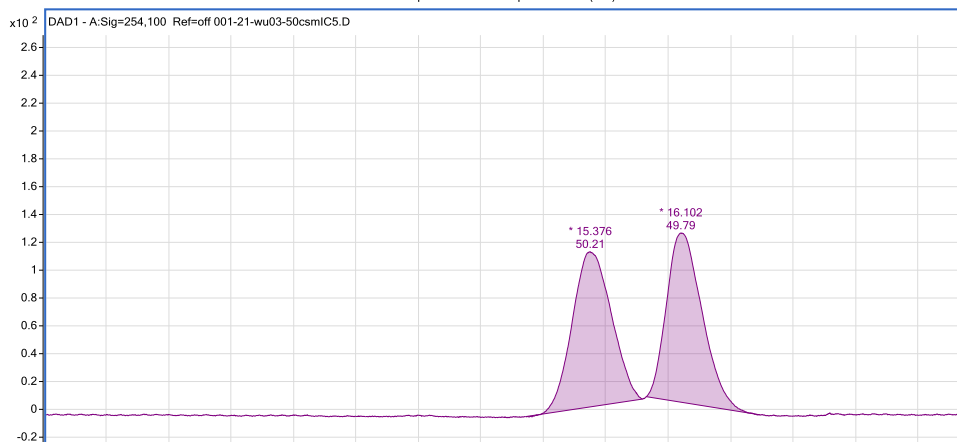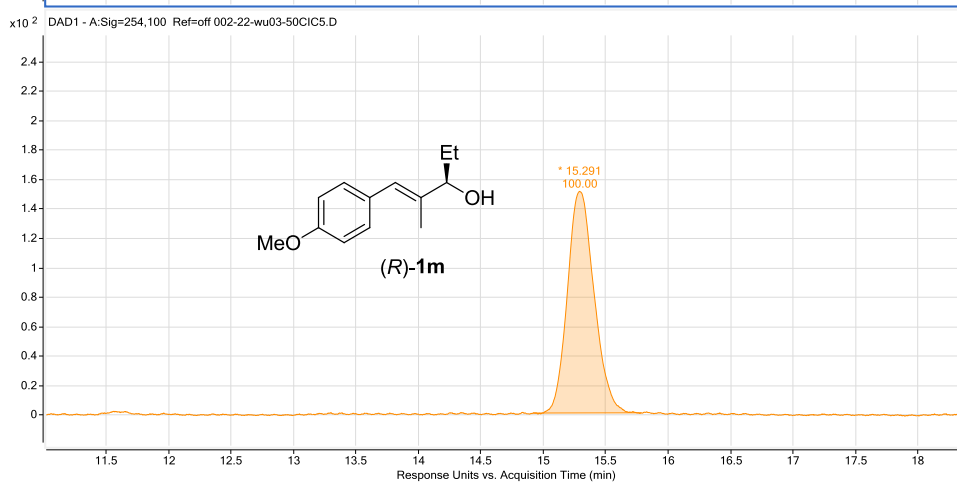



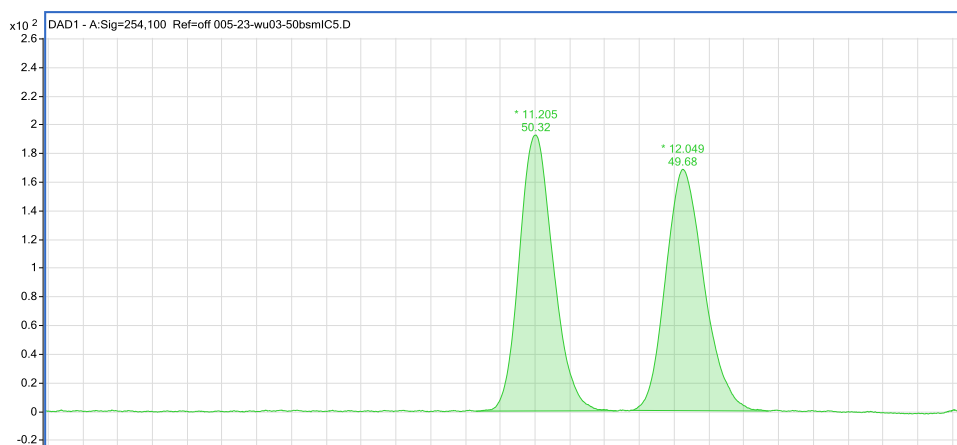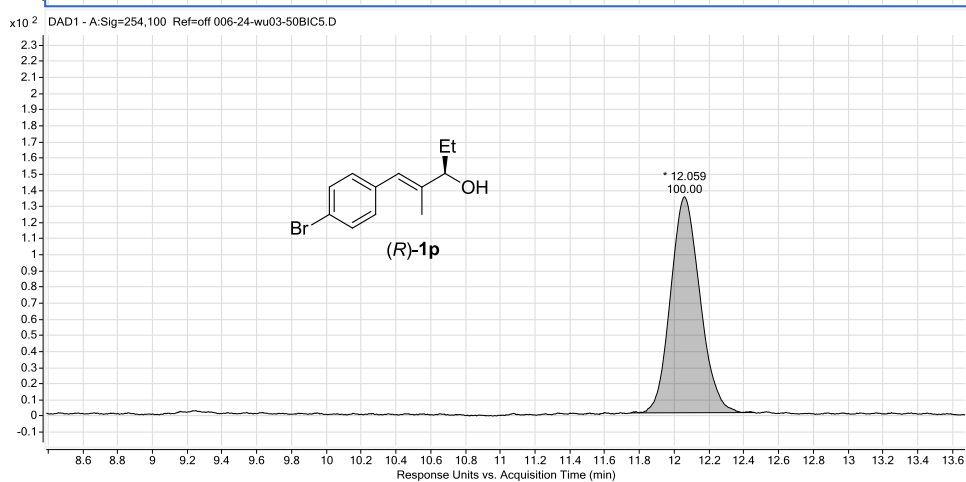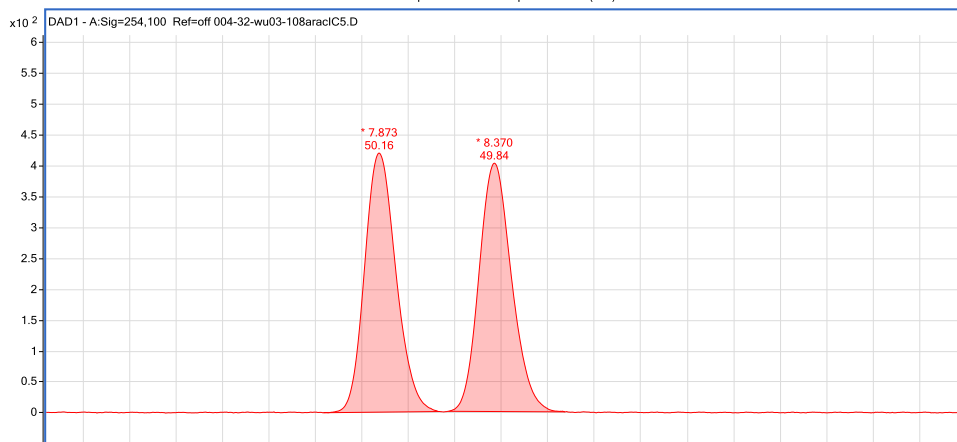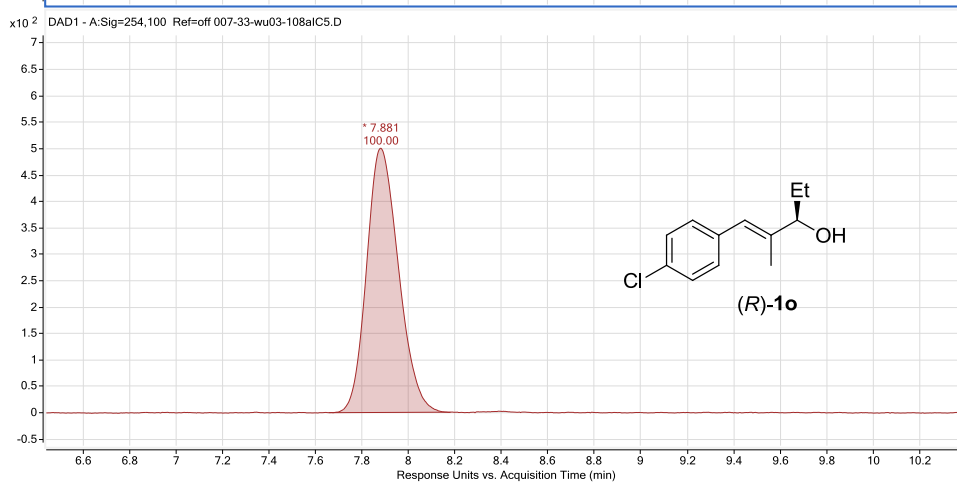

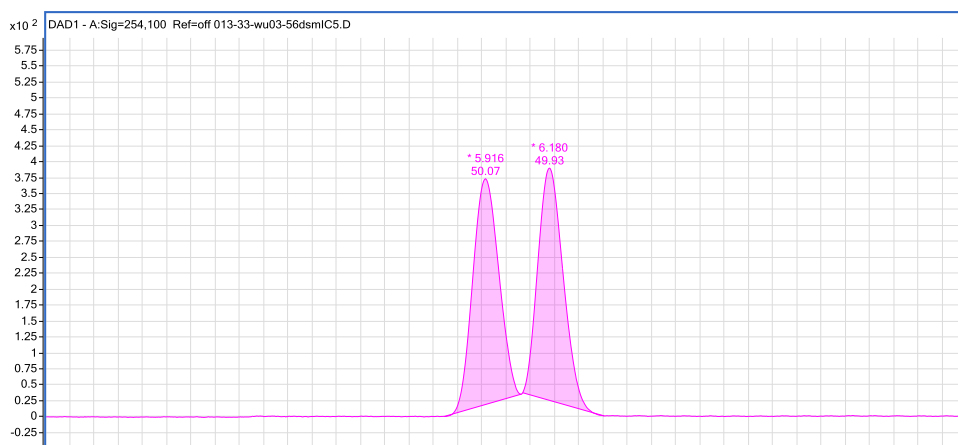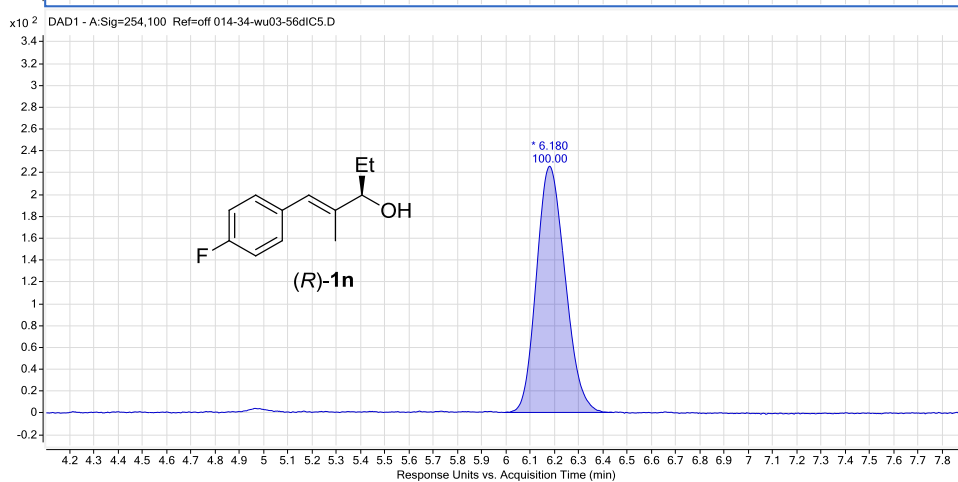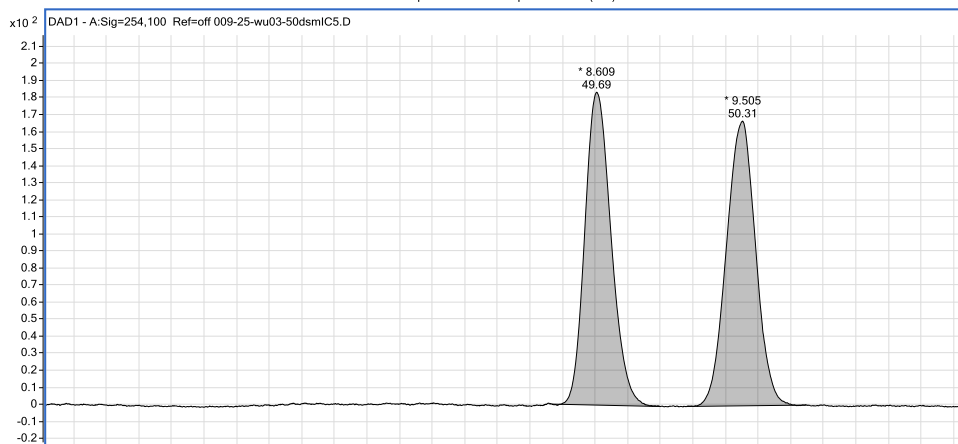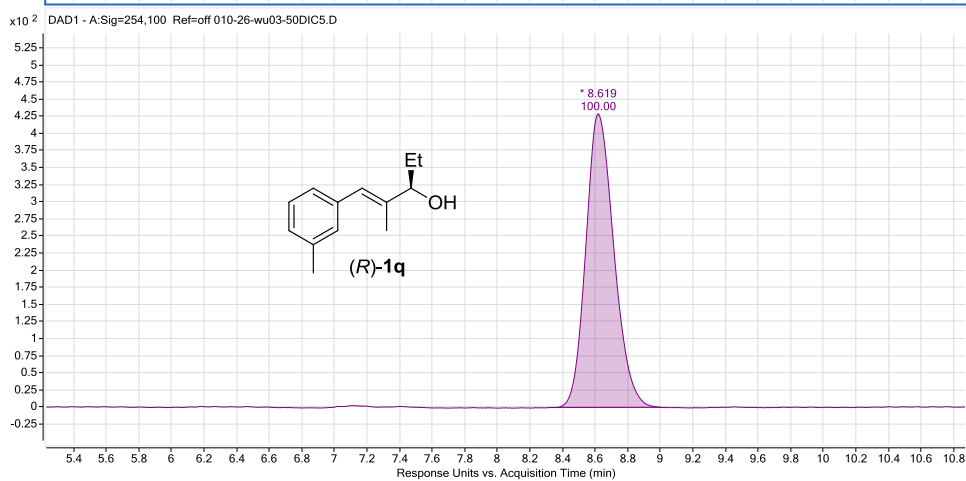

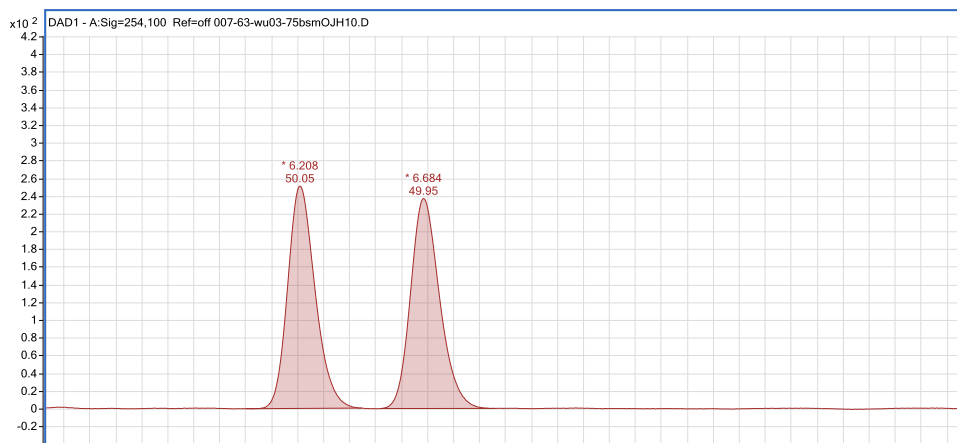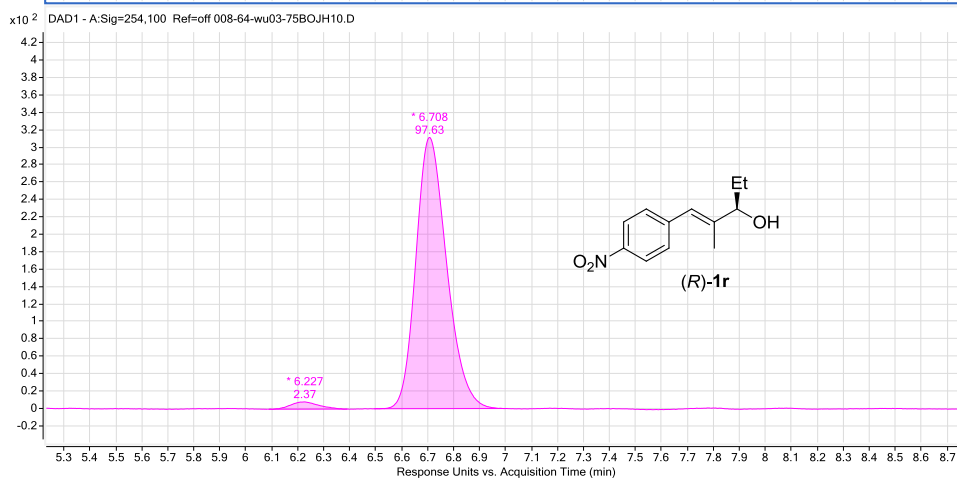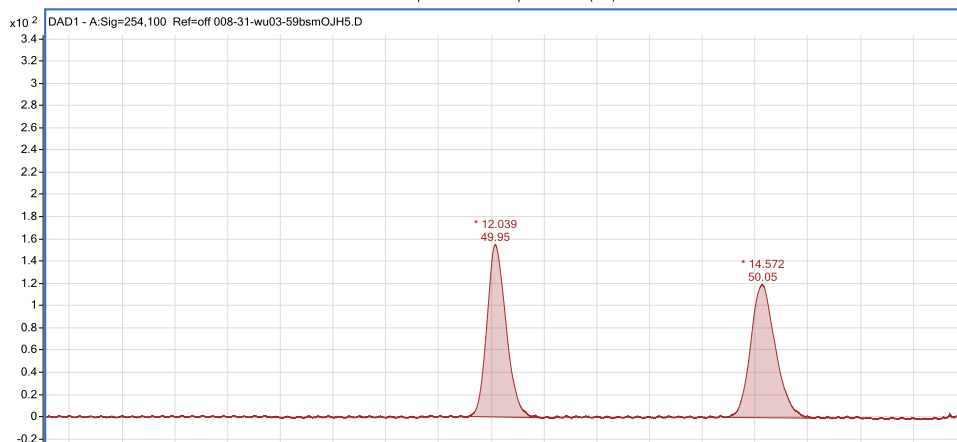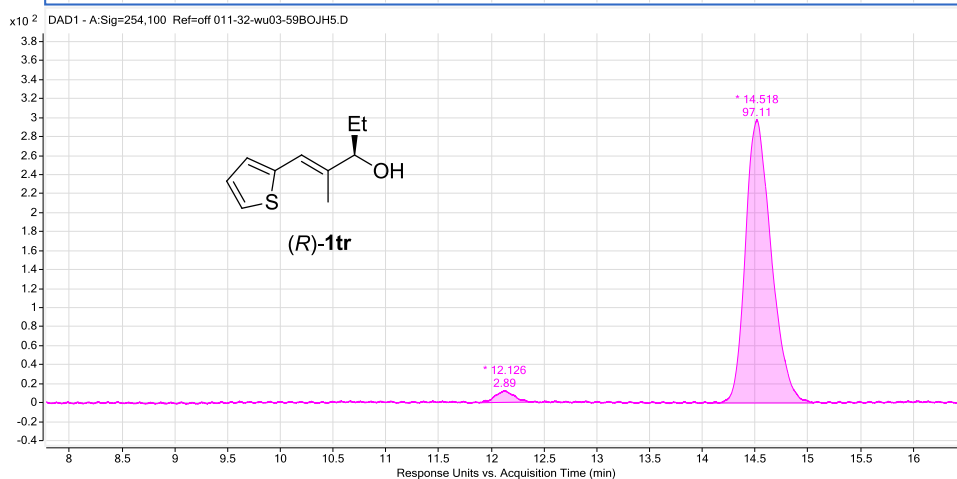

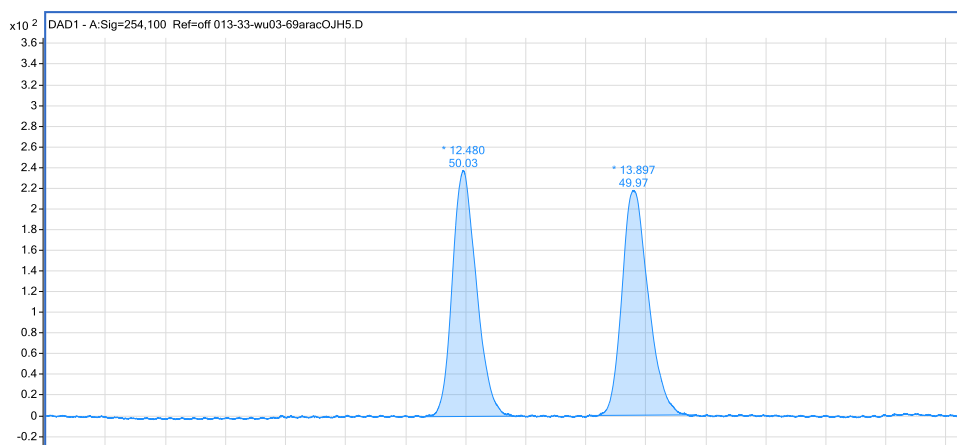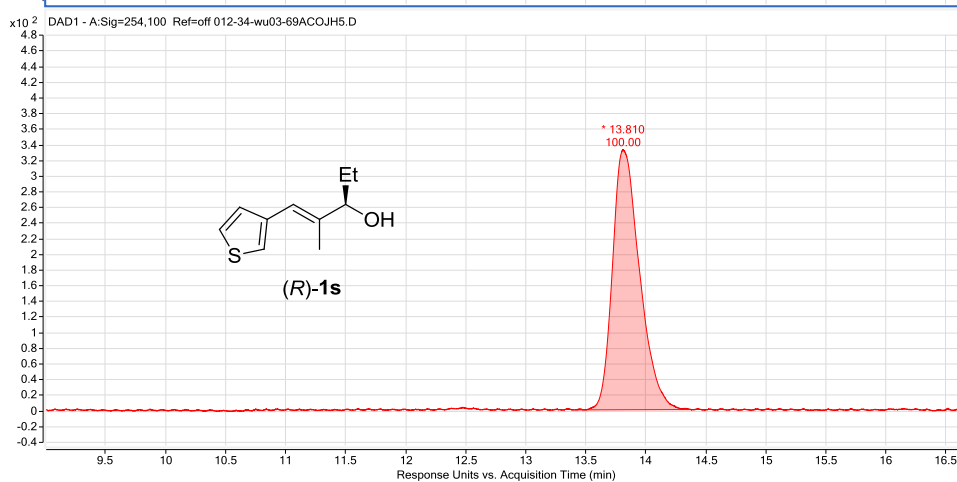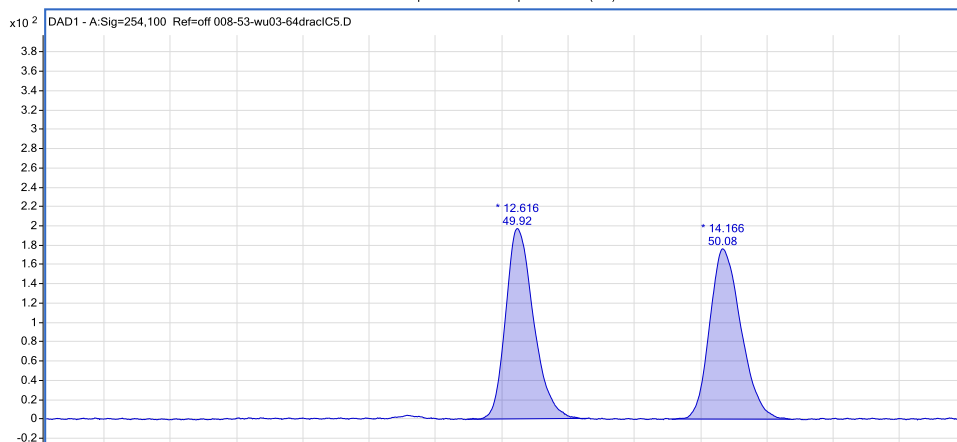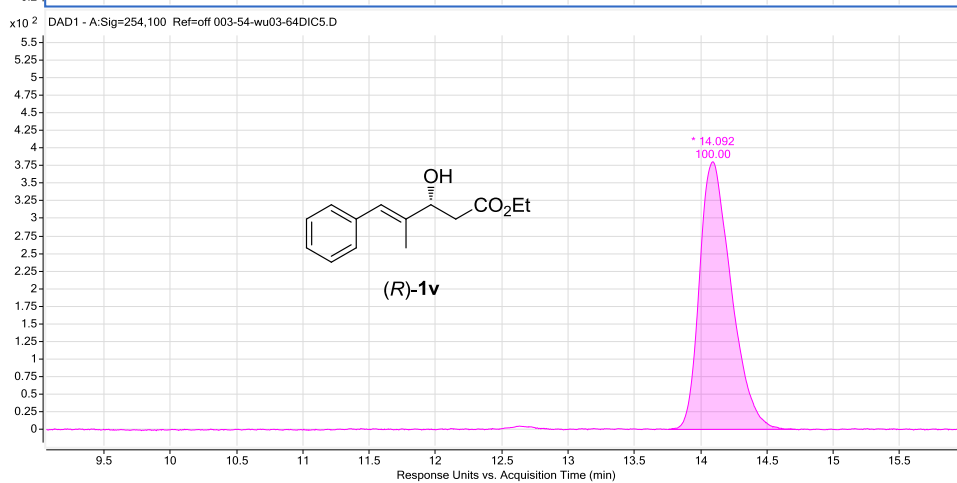

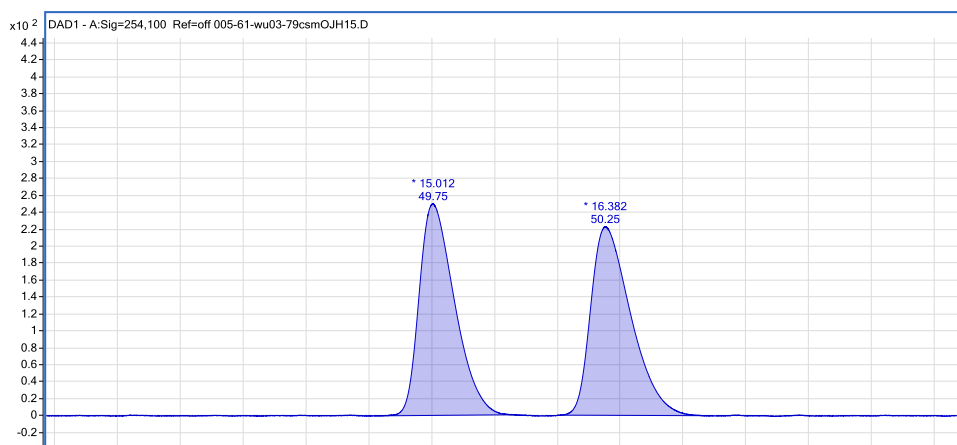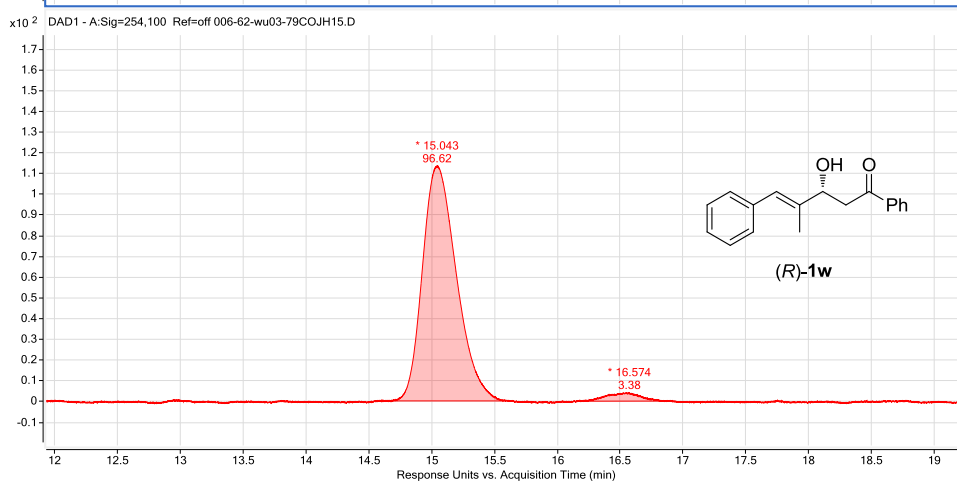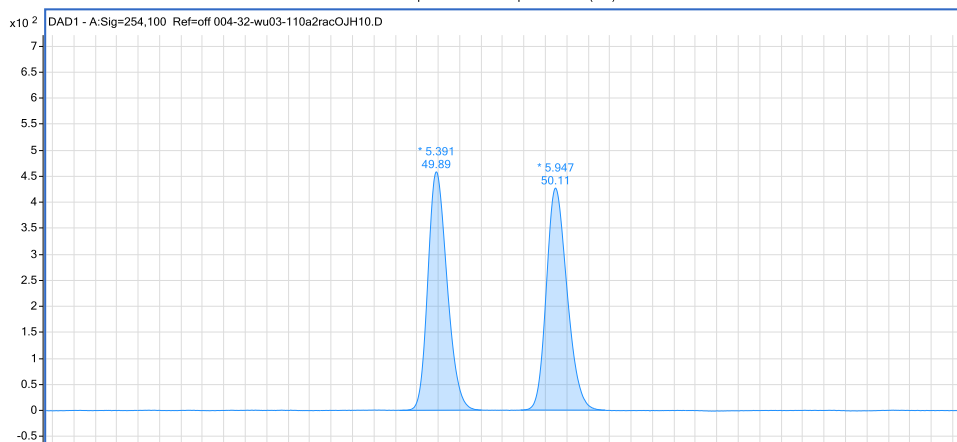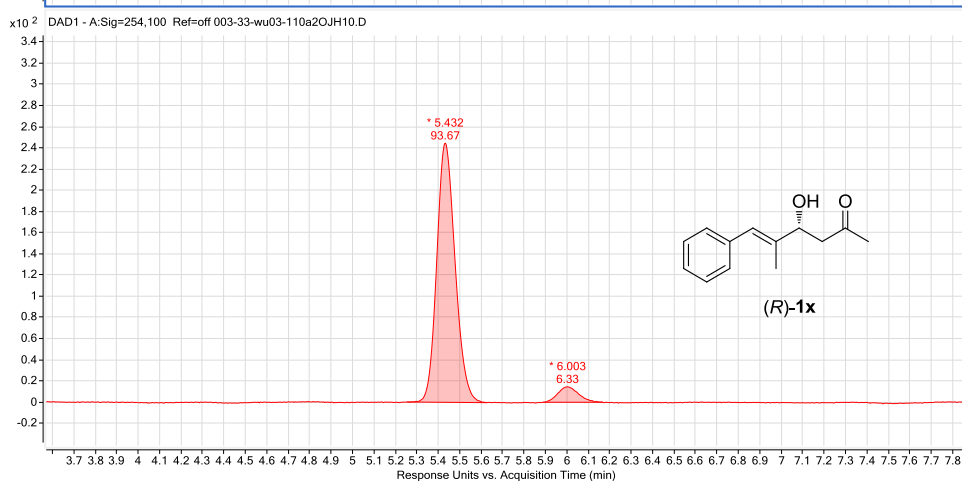

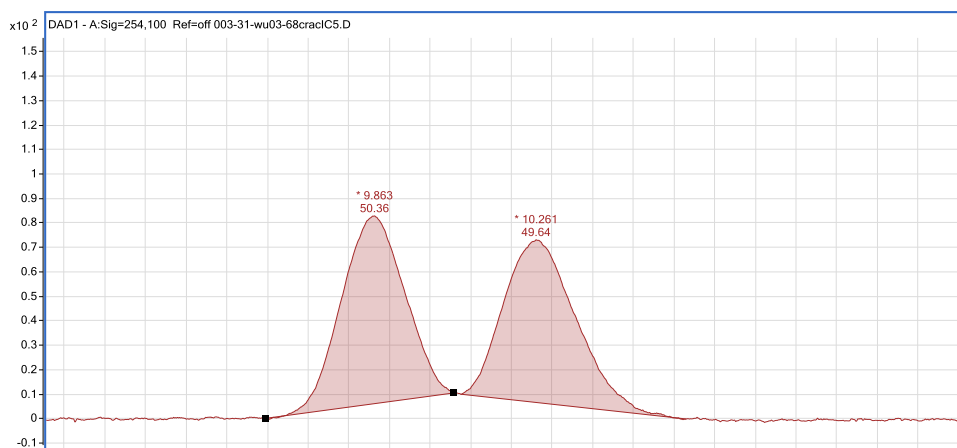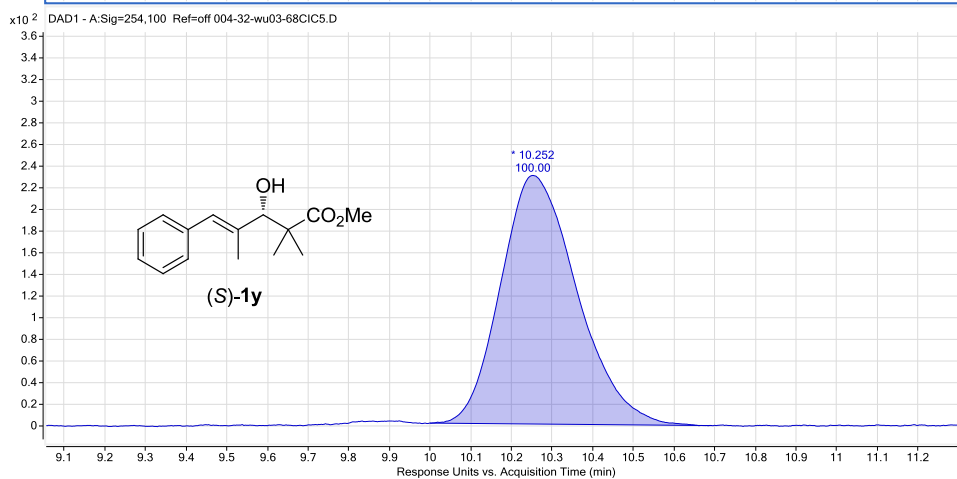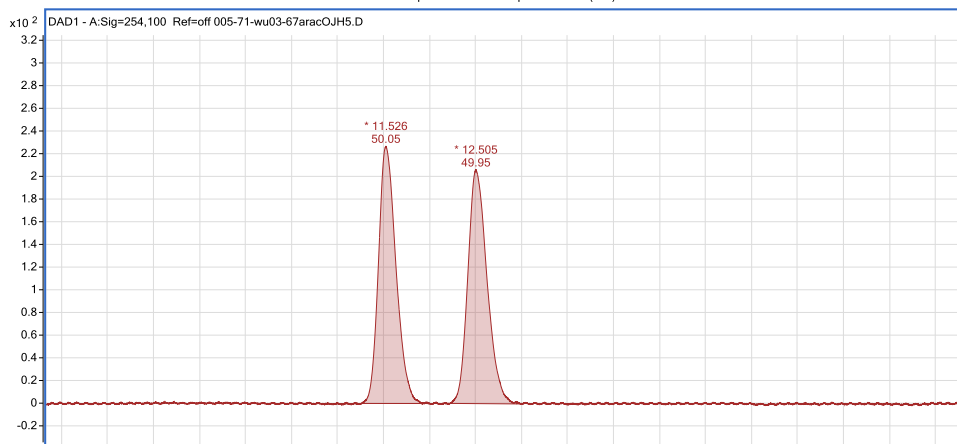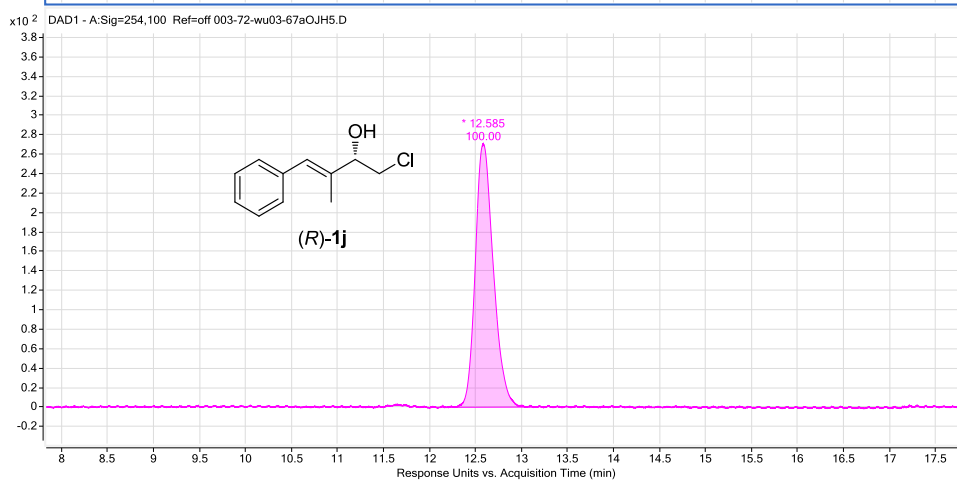

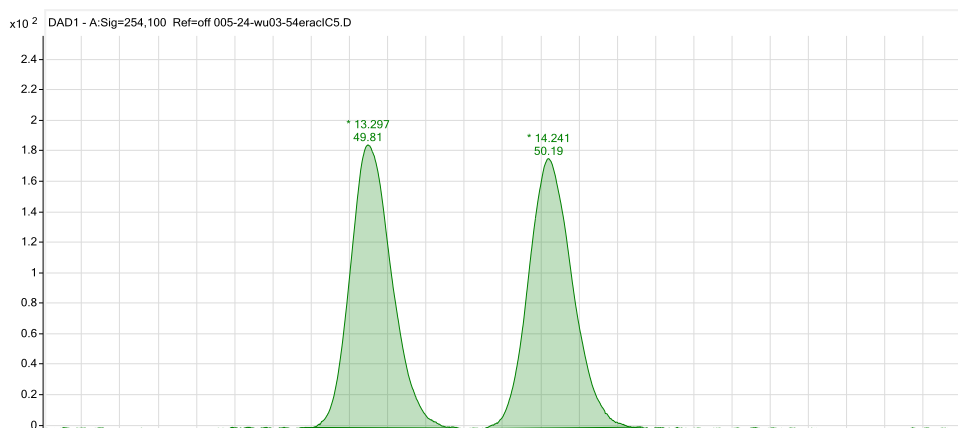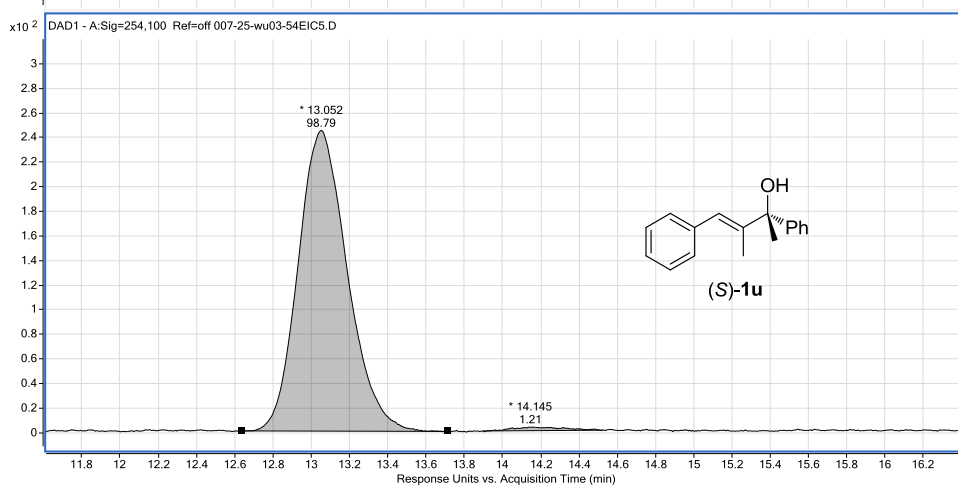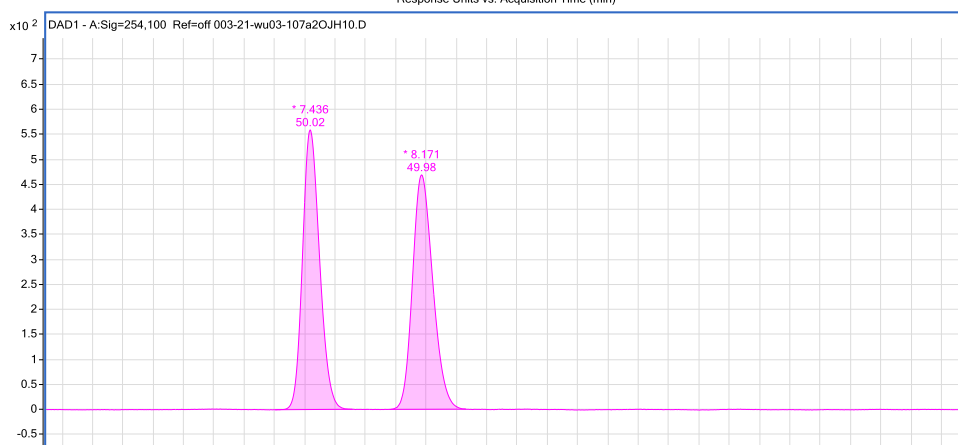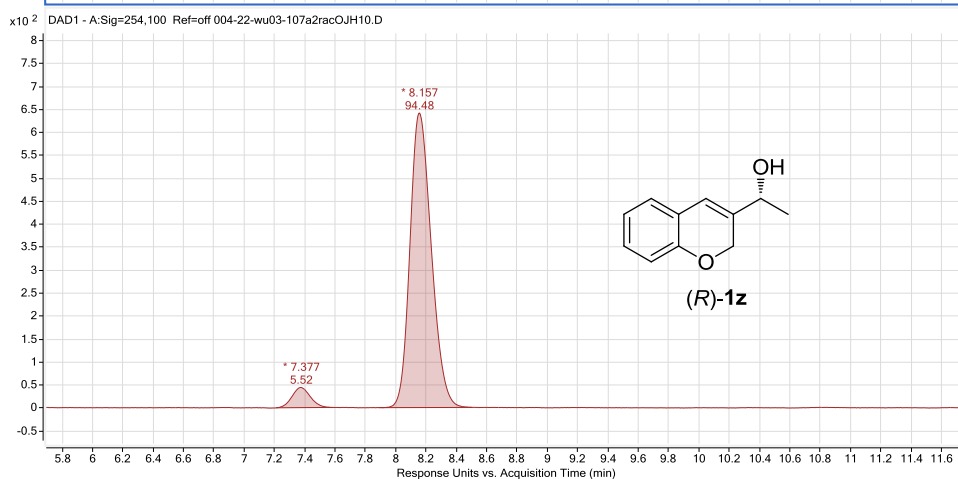

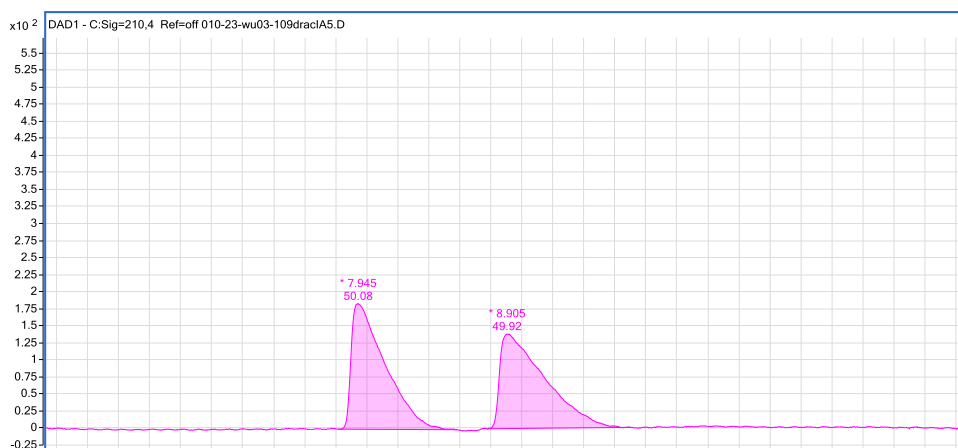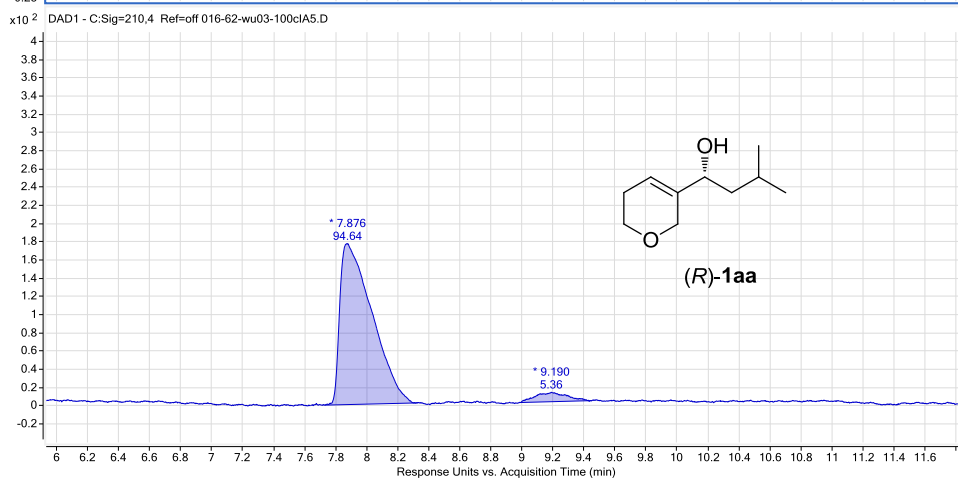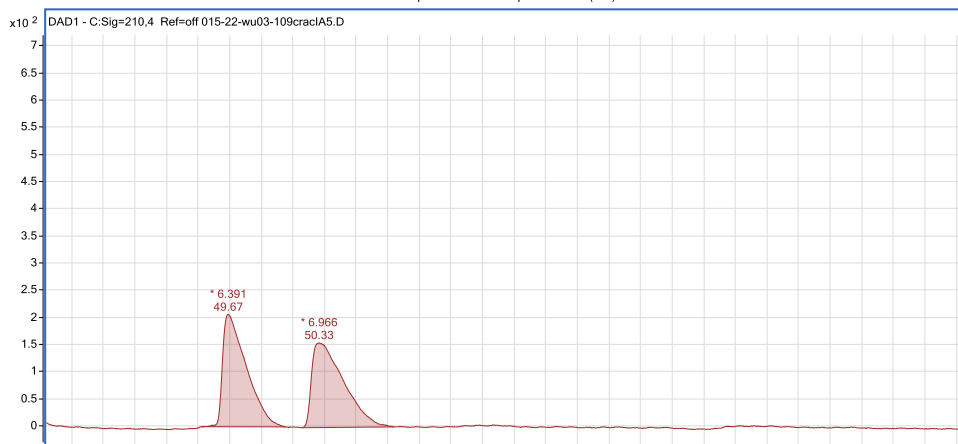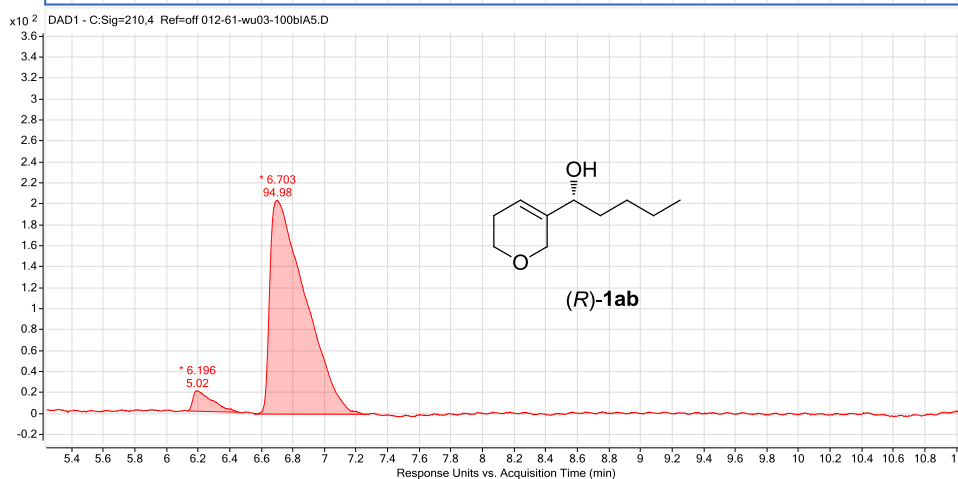



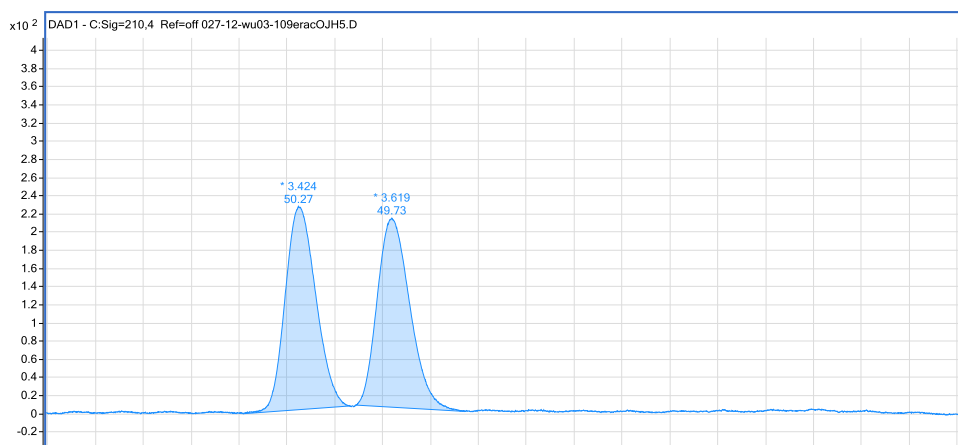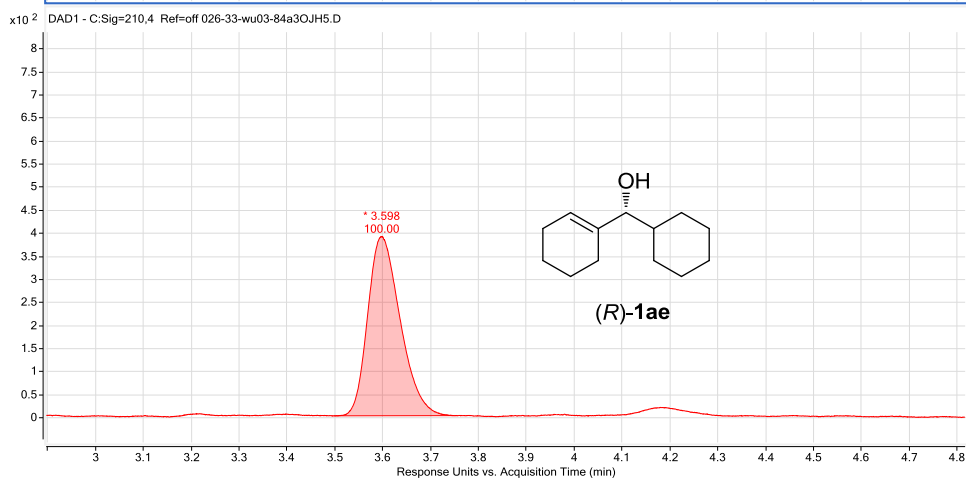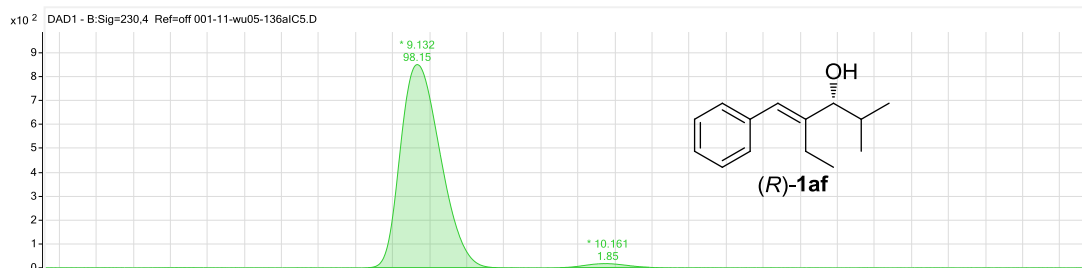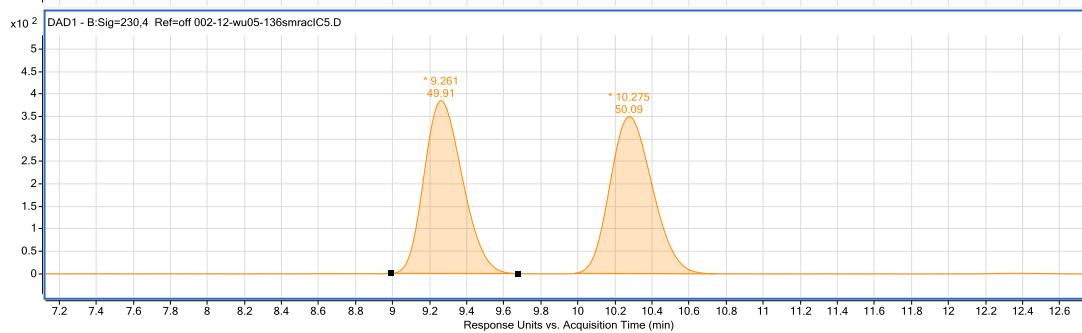

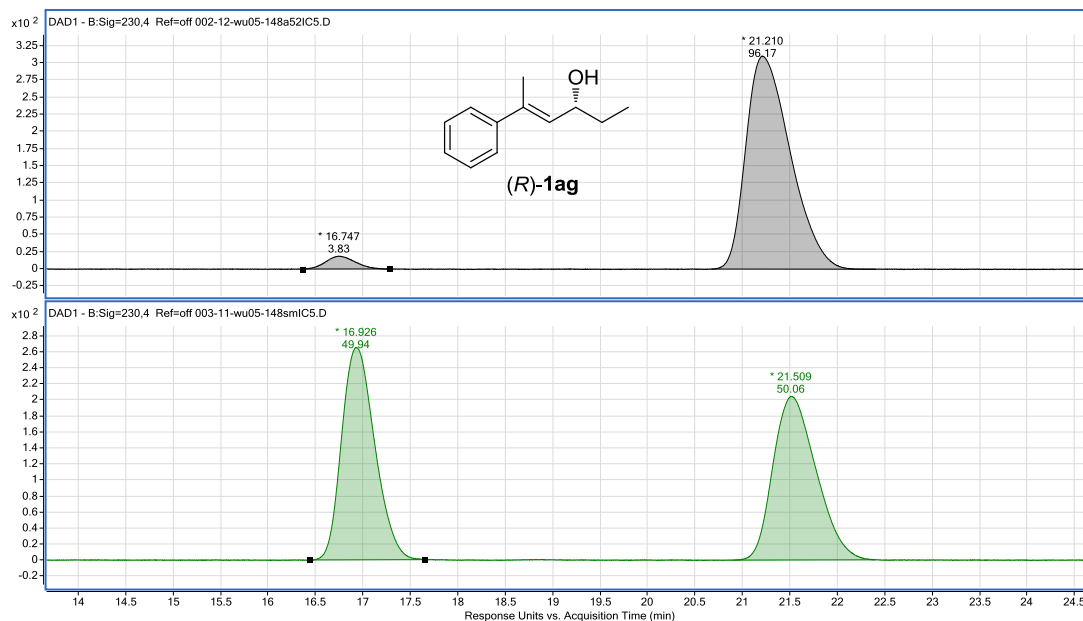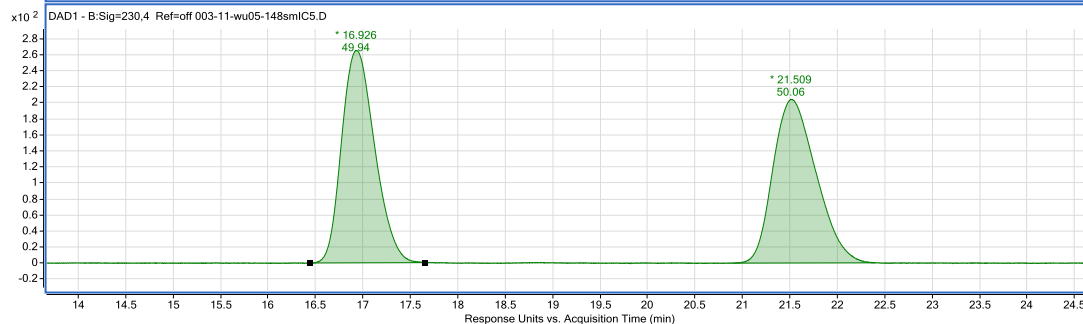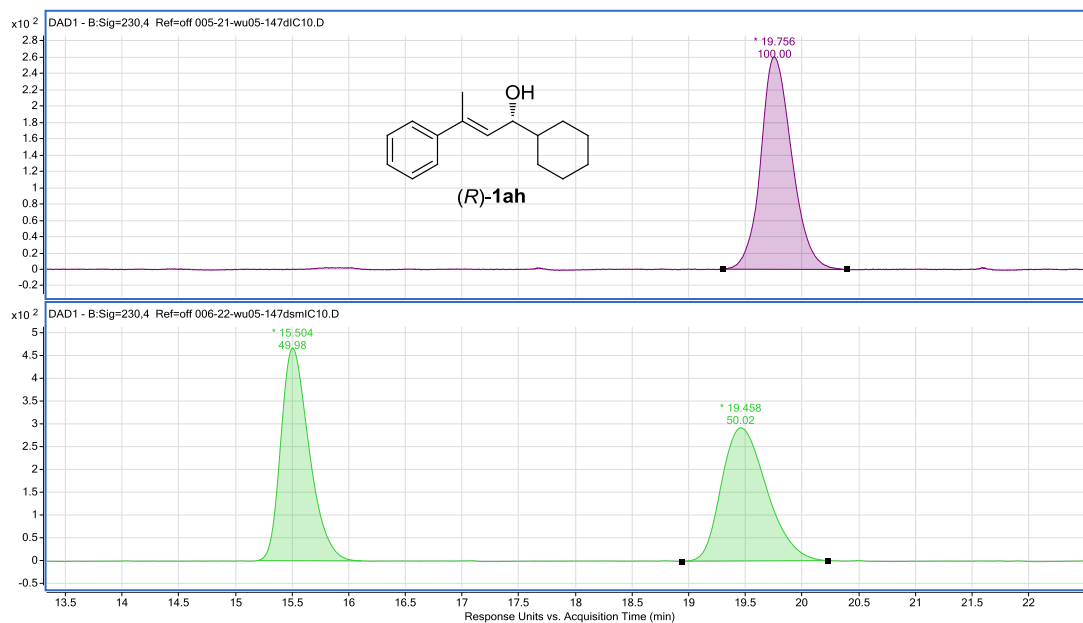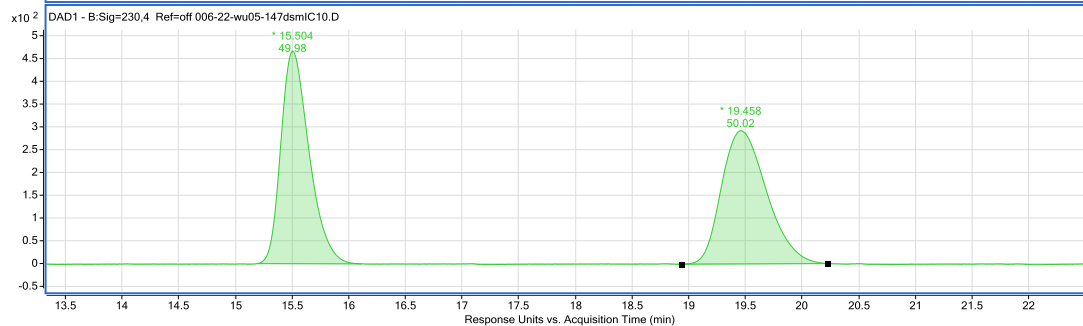

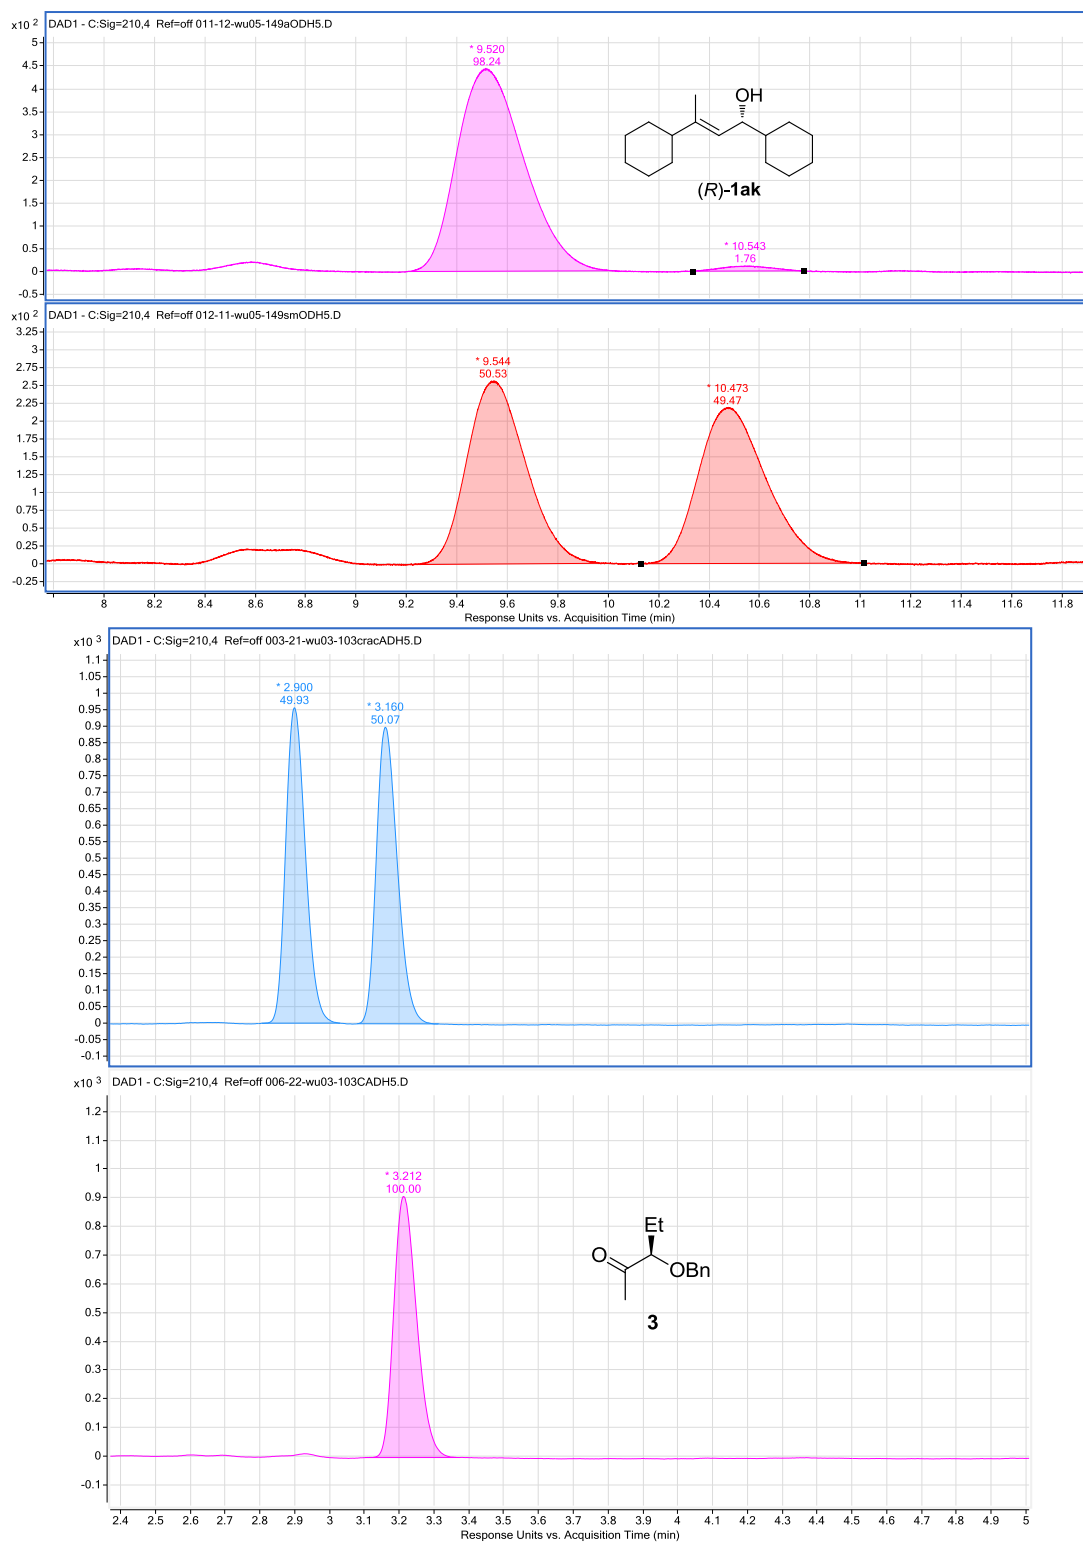

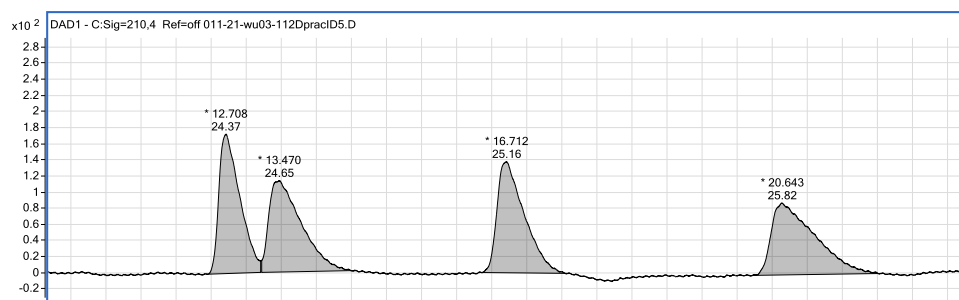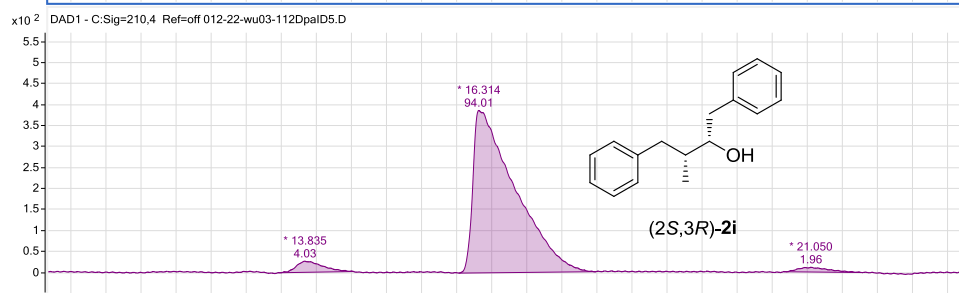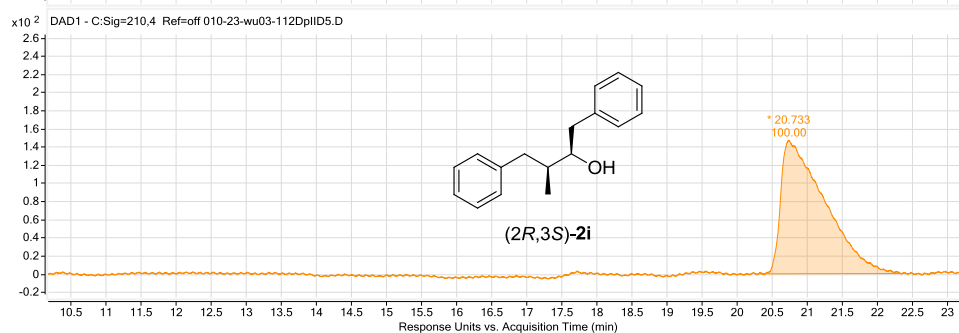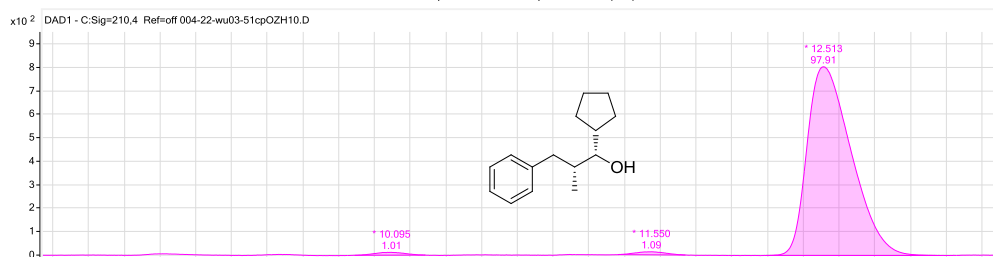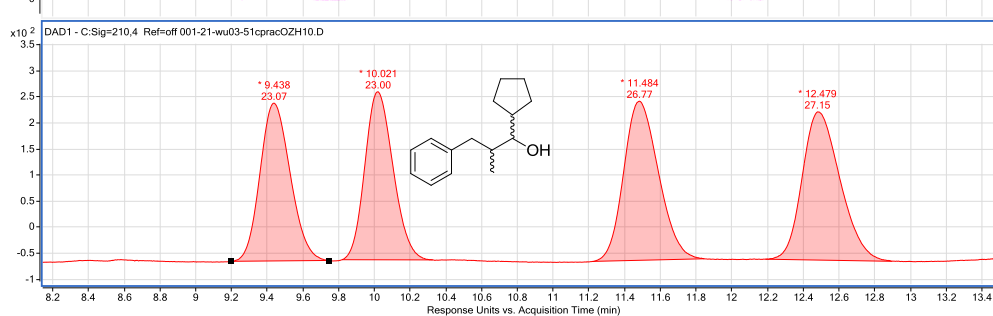

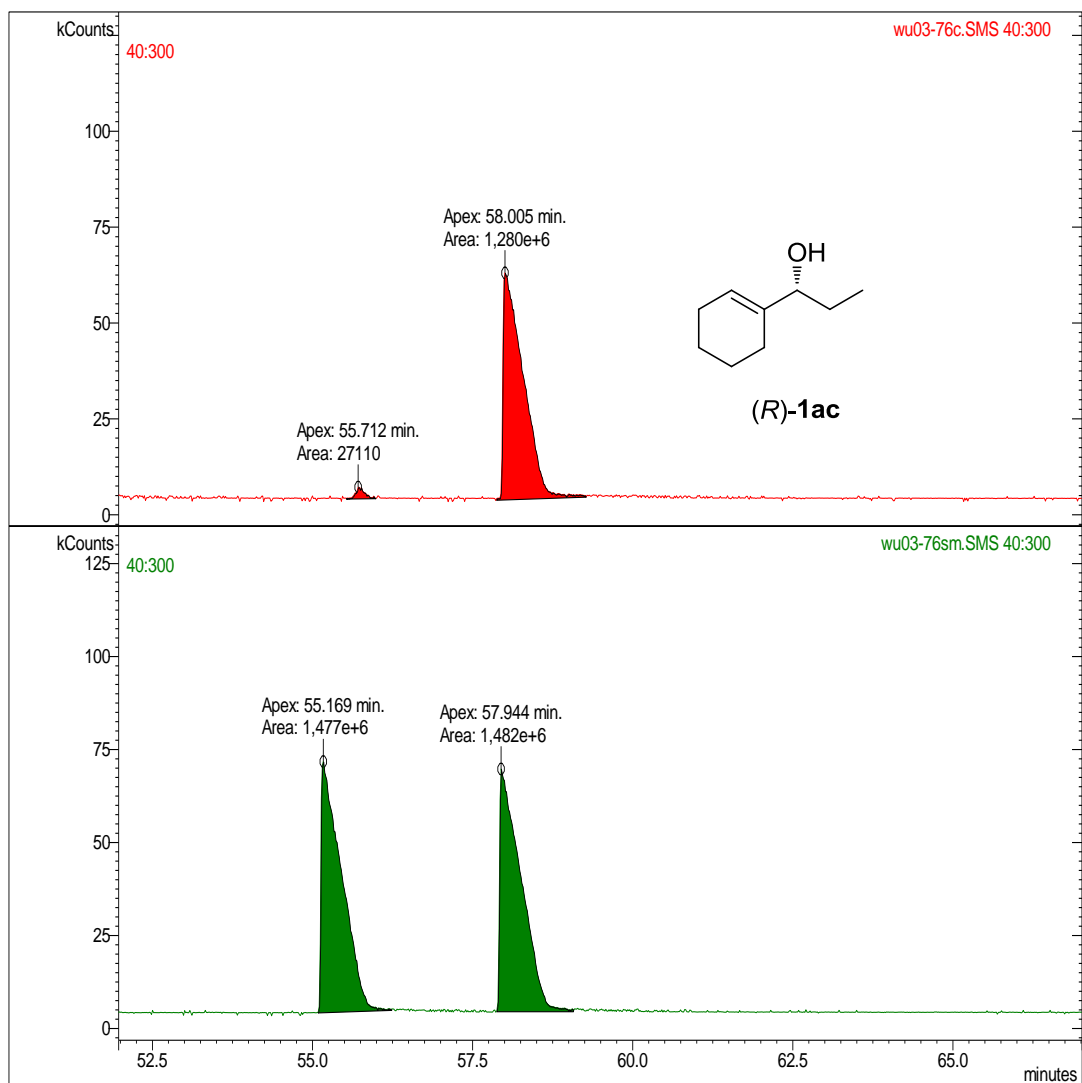

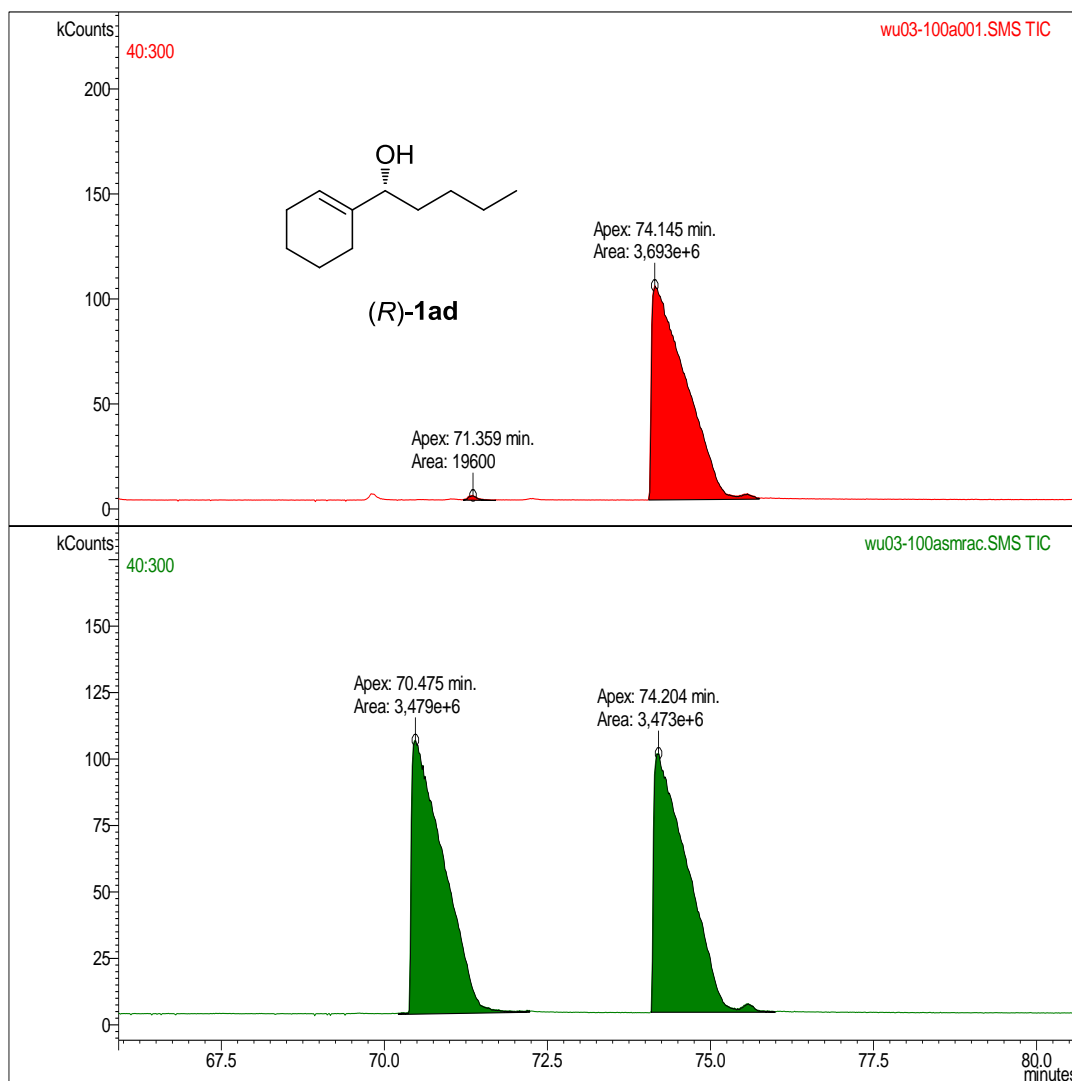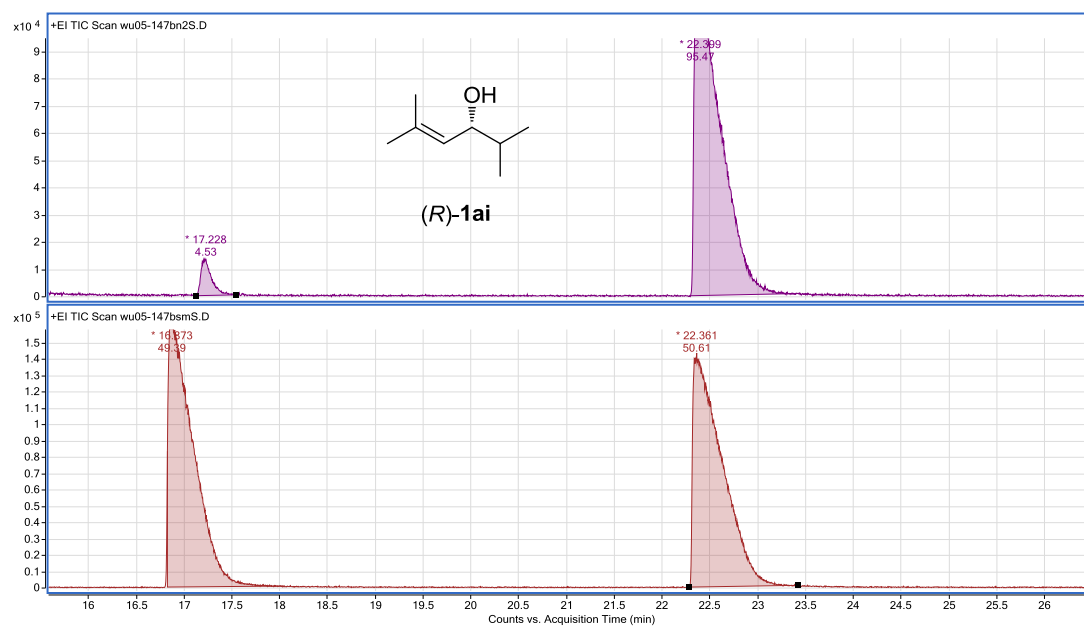

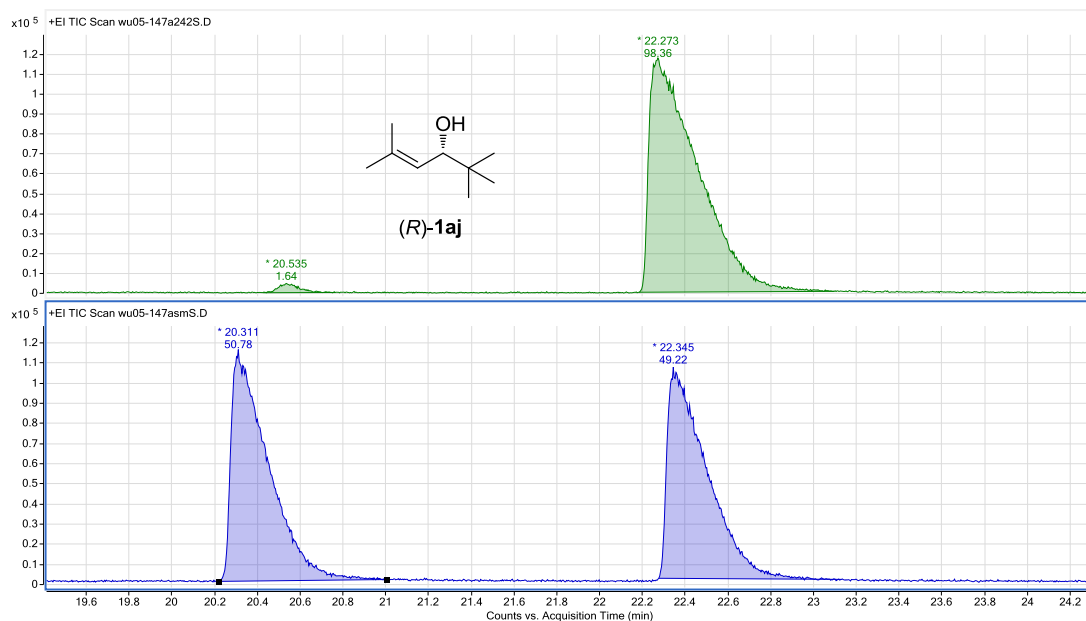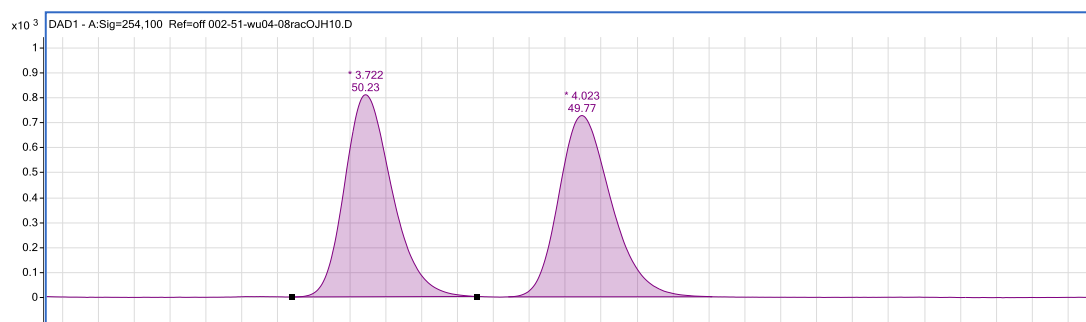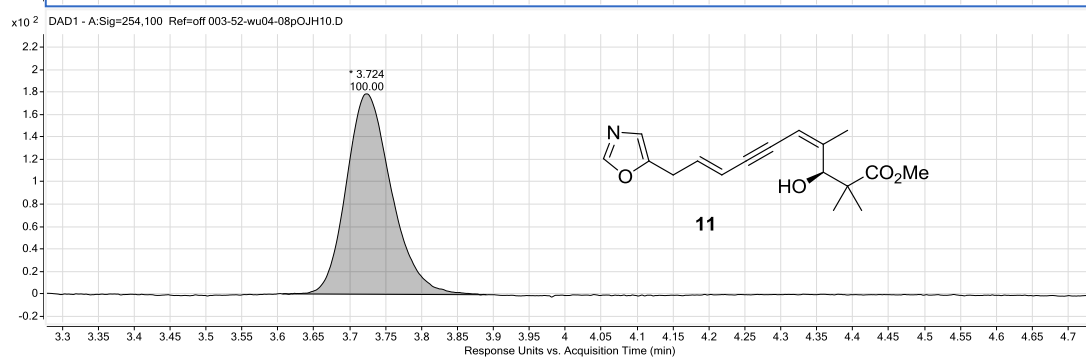

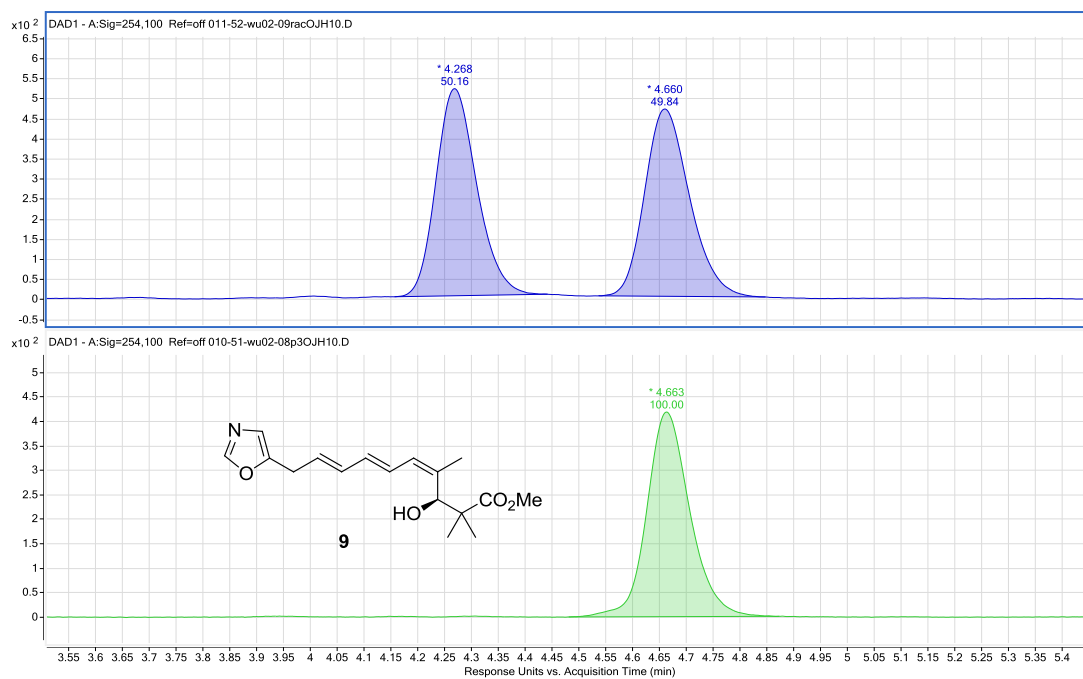



## 8. $^1\text{H}$ , $^{13}\text{C}$ and $^{19}\text{F}$ NMR spectroscopic data

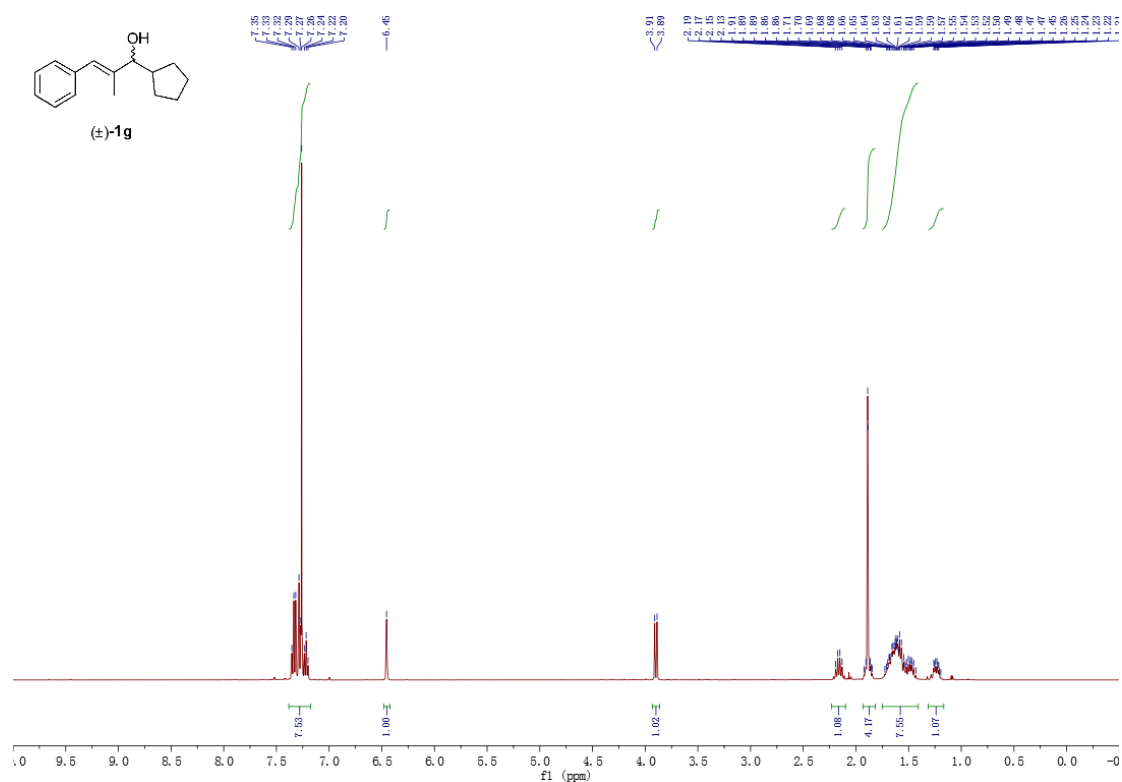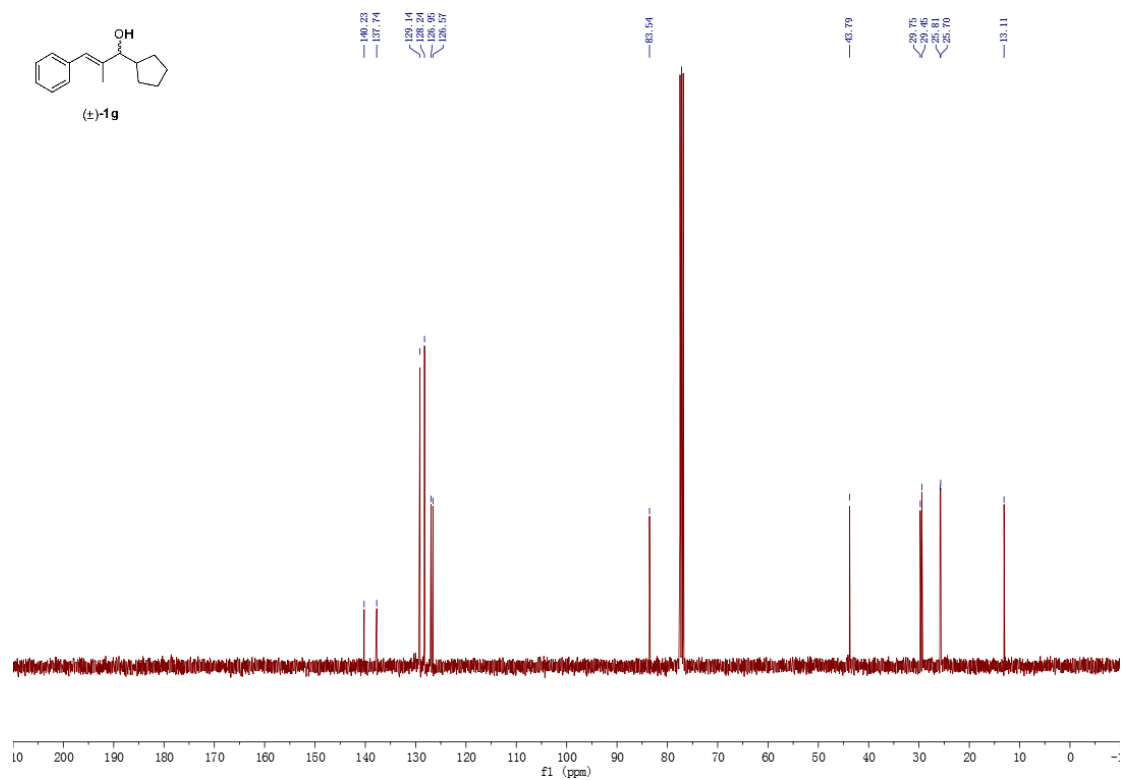

hnu-190201-203-51cp. 10. fid

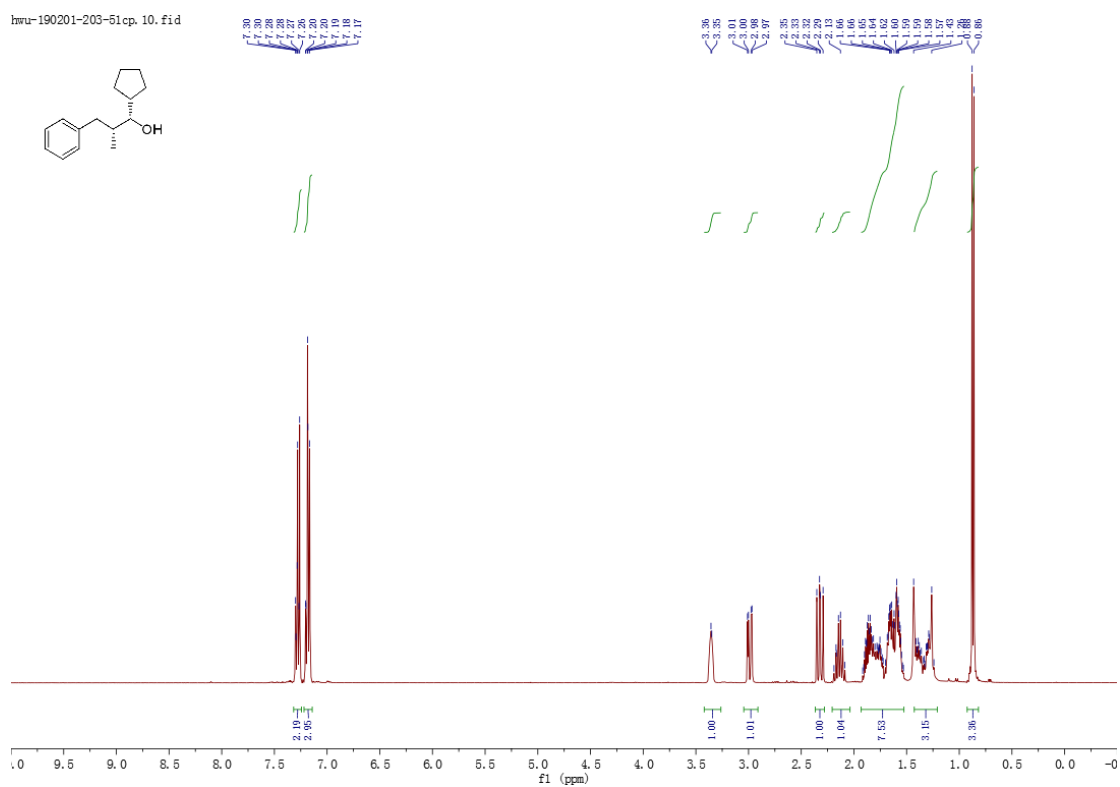

hnu-190201-203-51cp. 20. fid

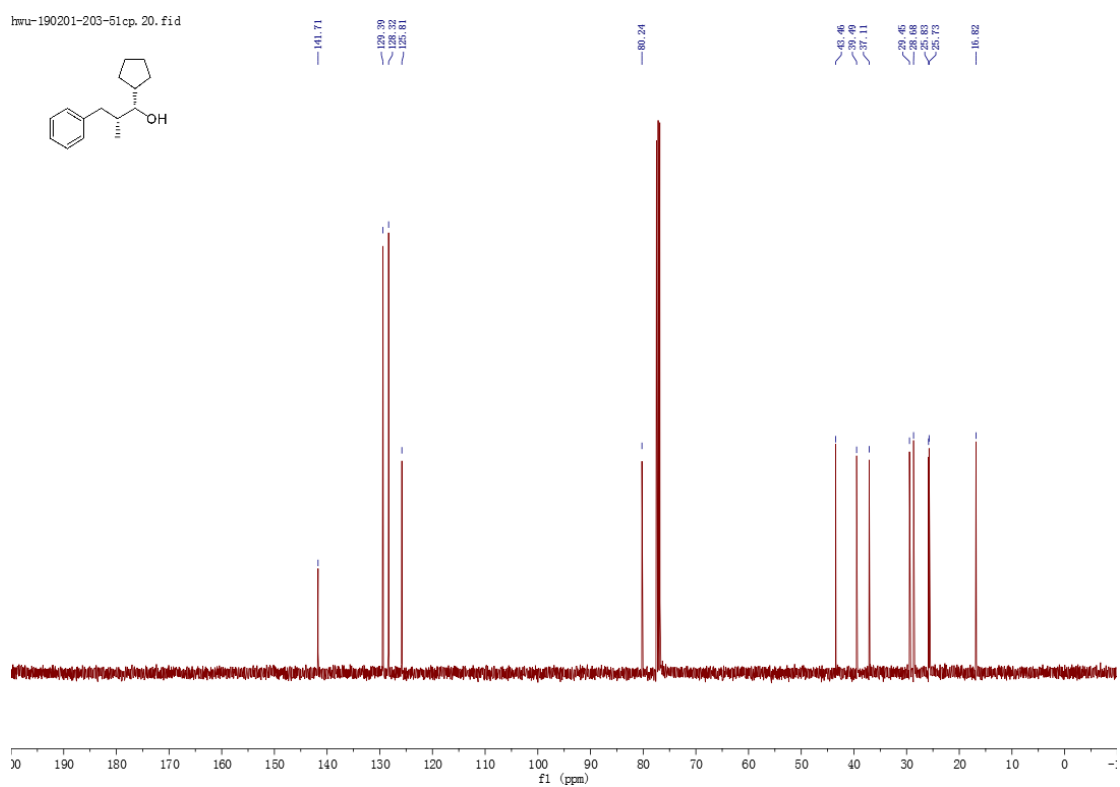

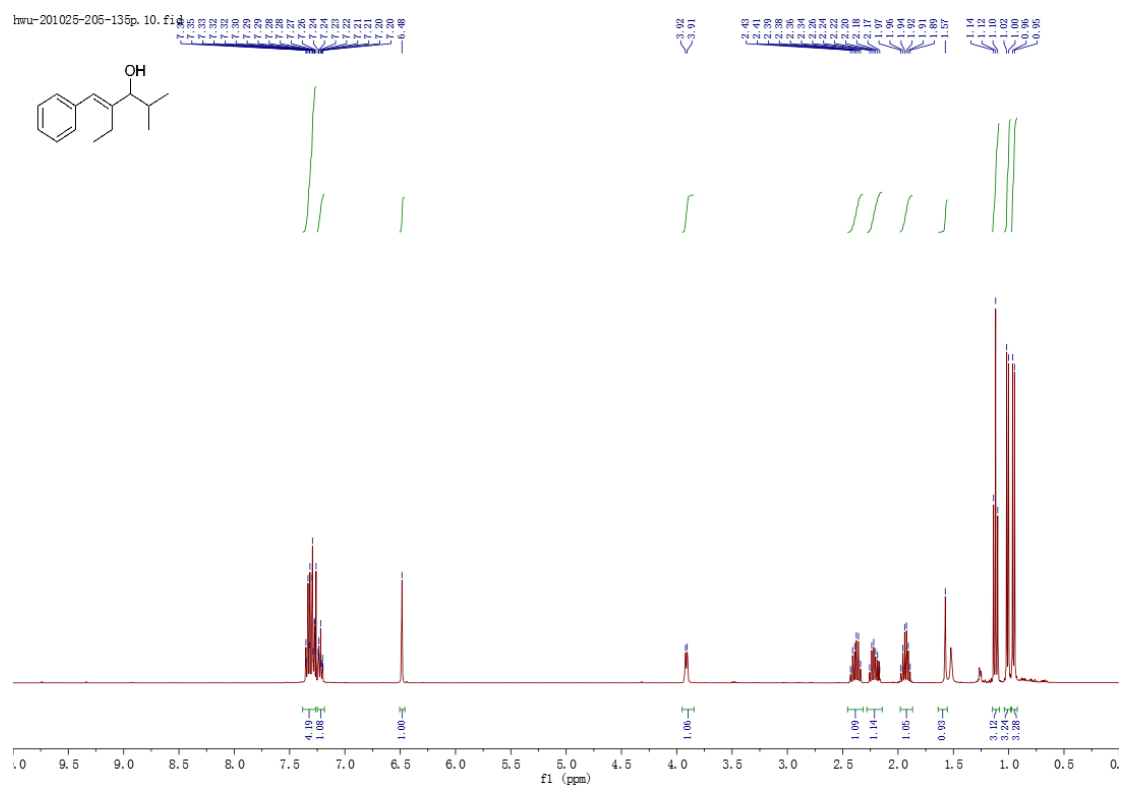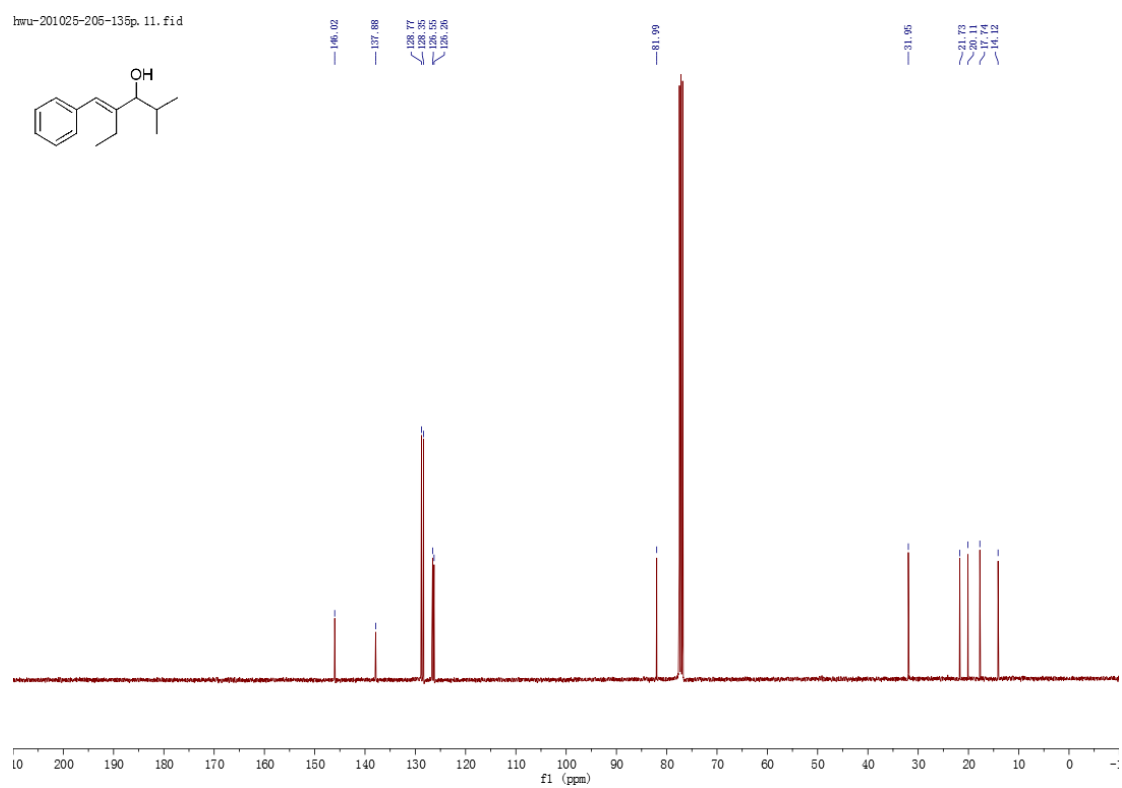

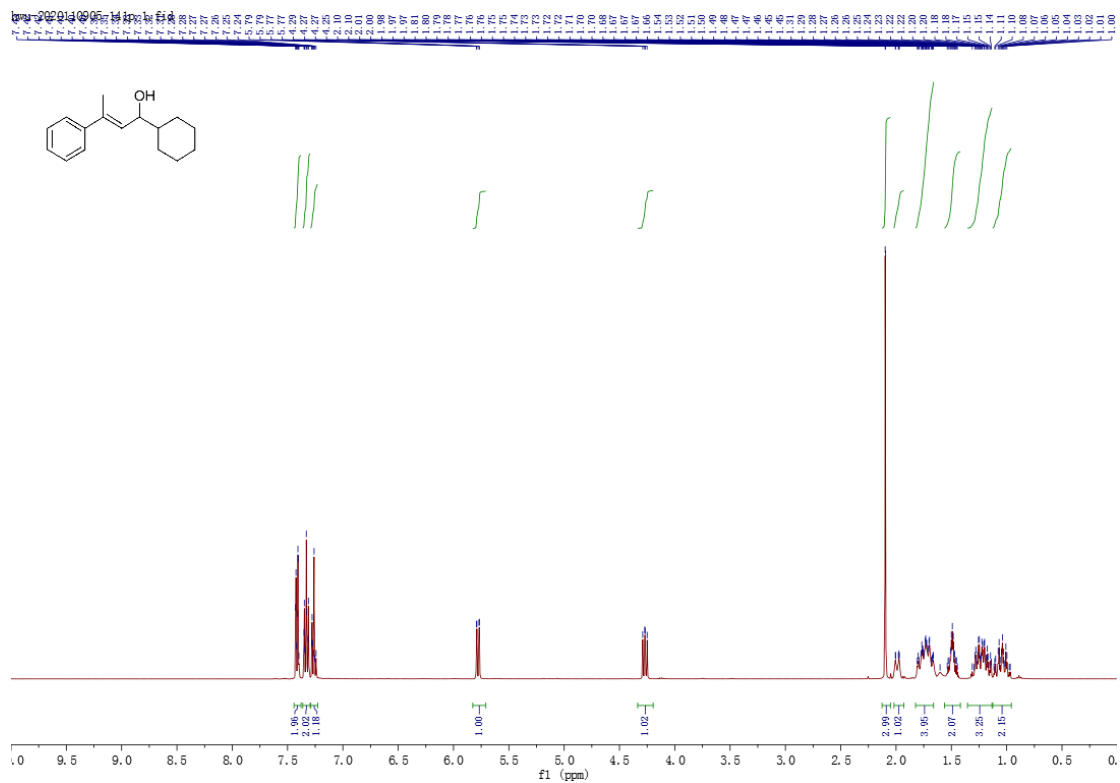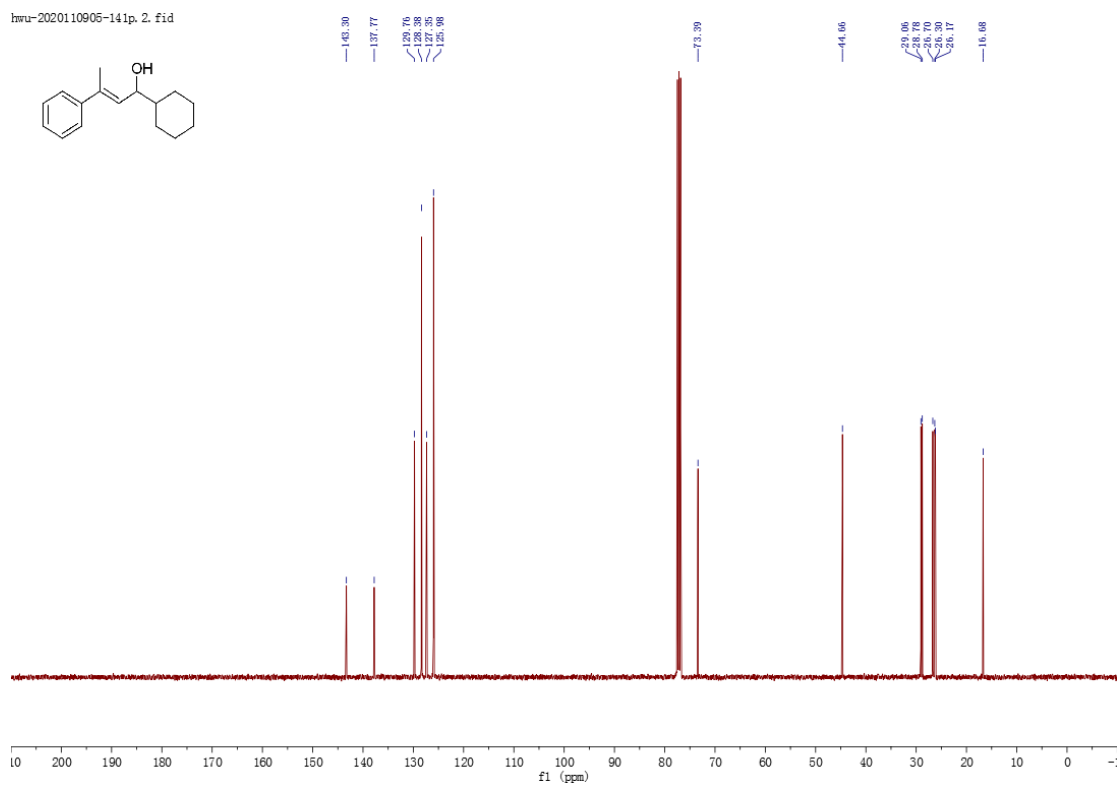

hvu-2020110905-149sm.1.fid

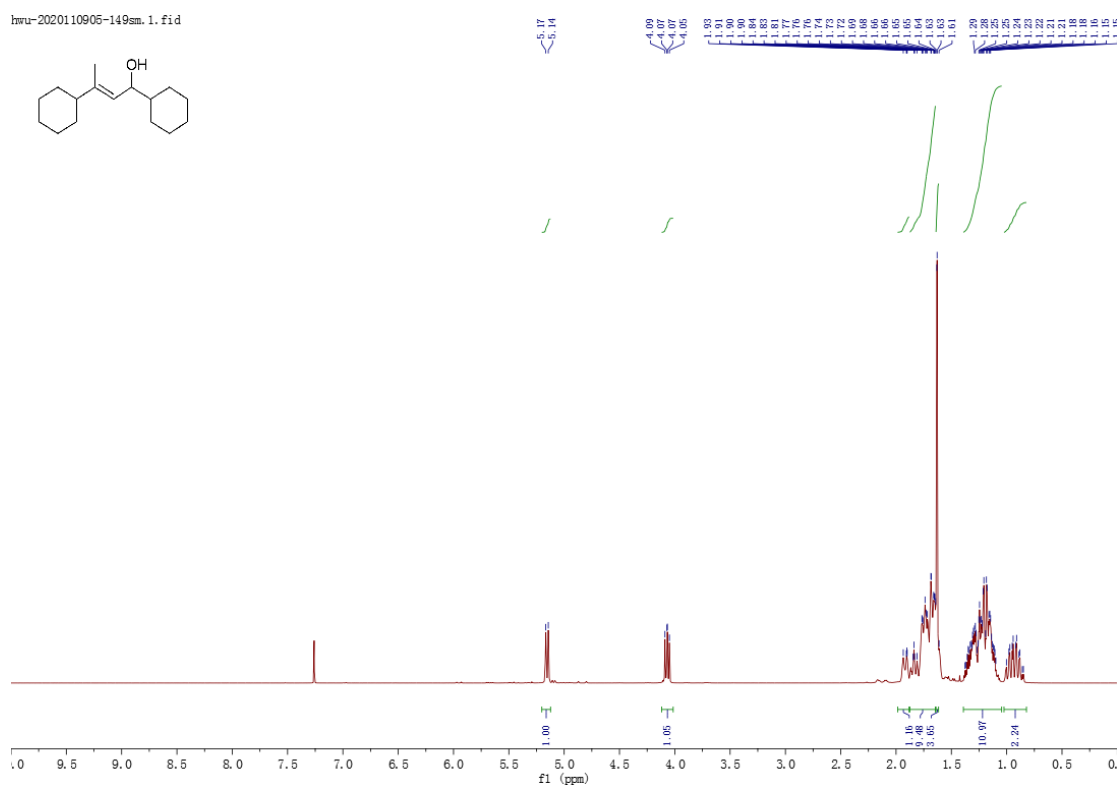

hvu-2020110905-149sm.2.fid

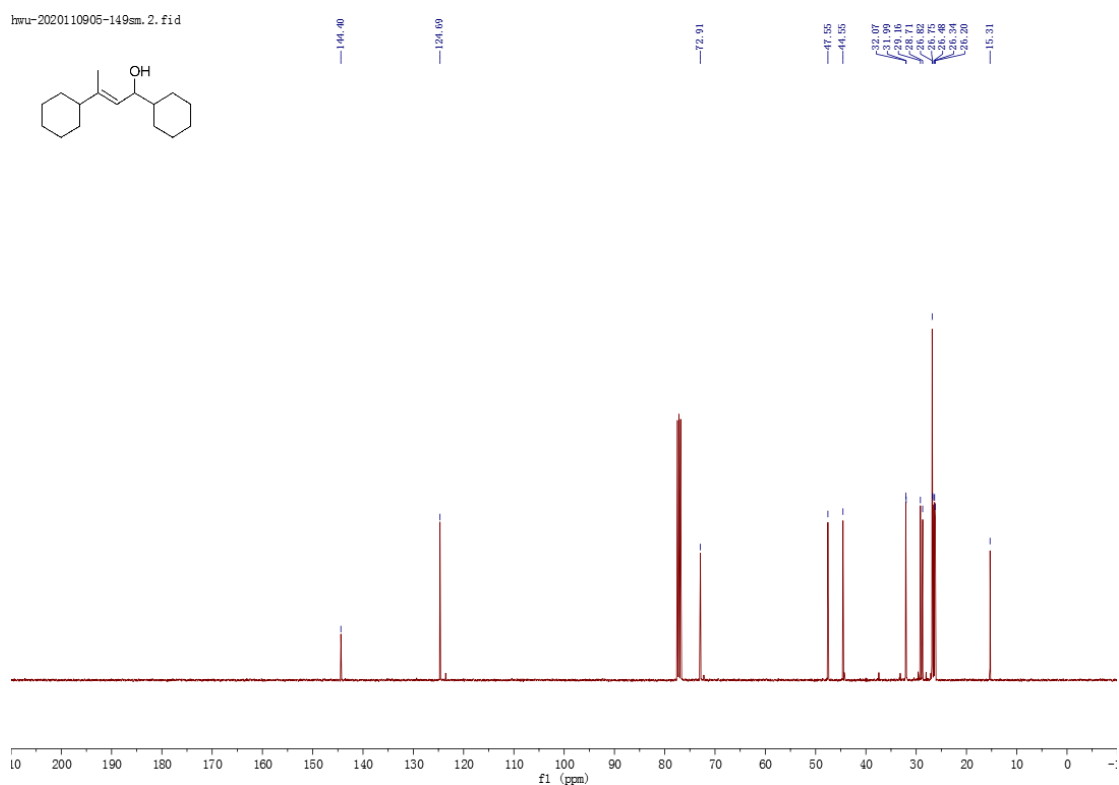

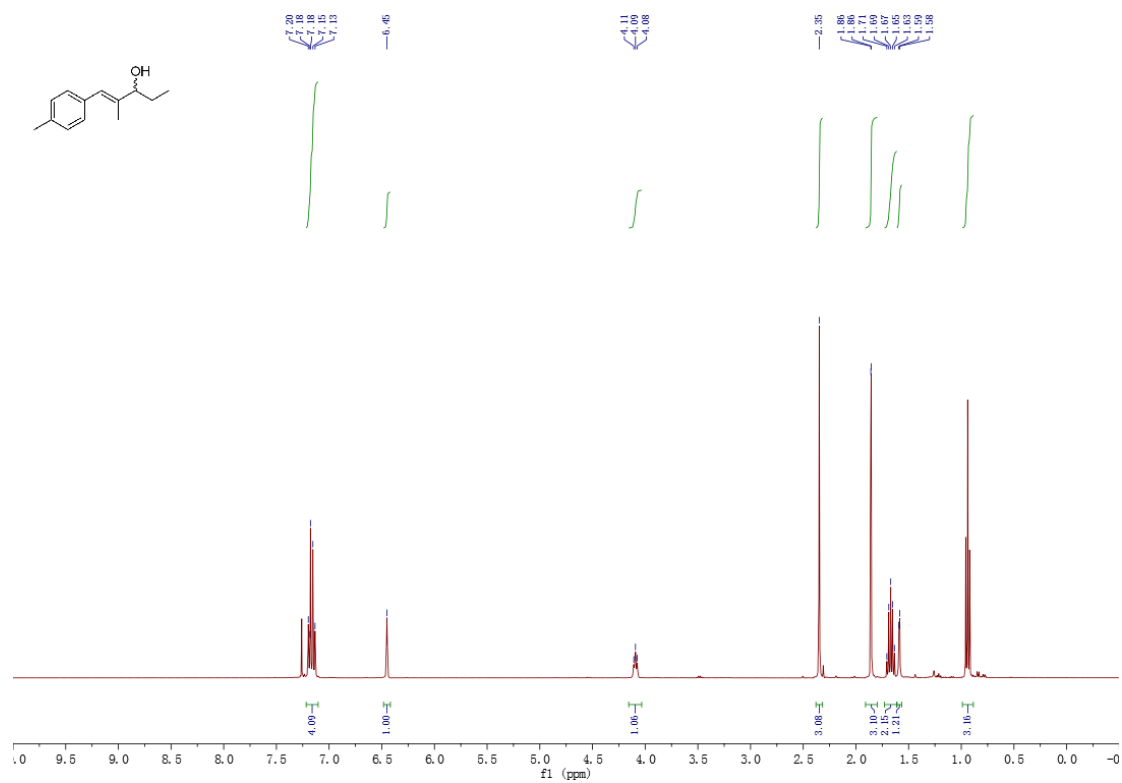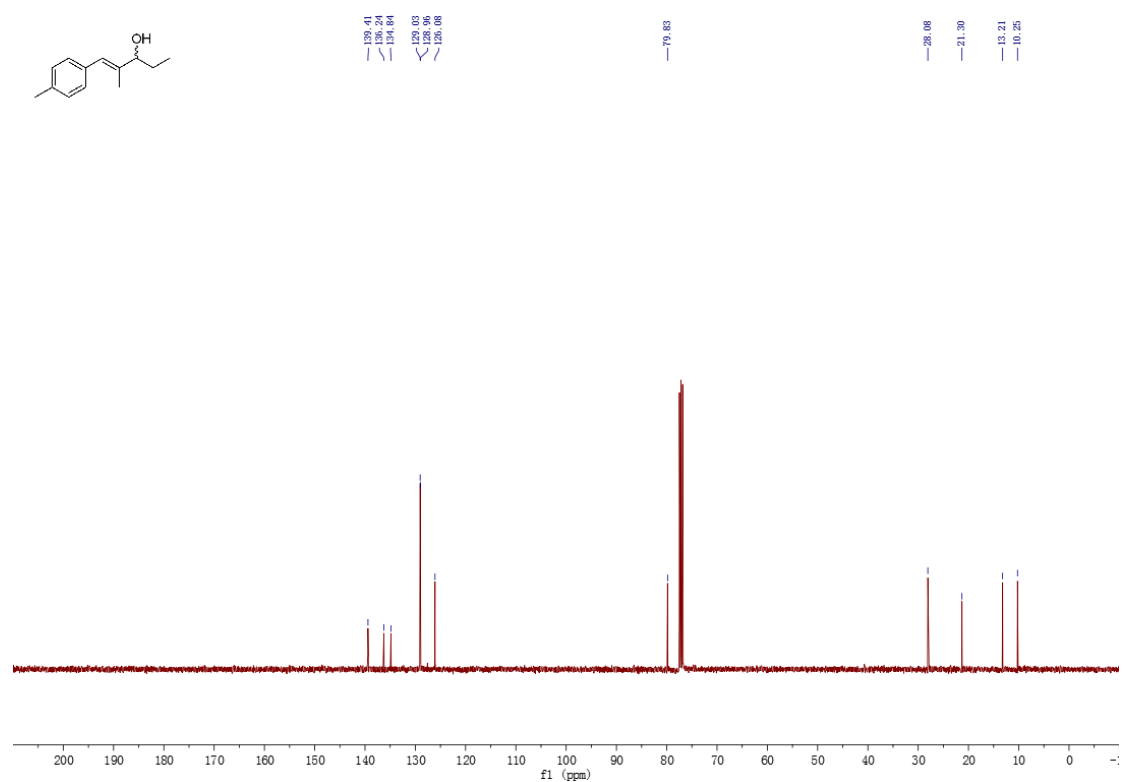

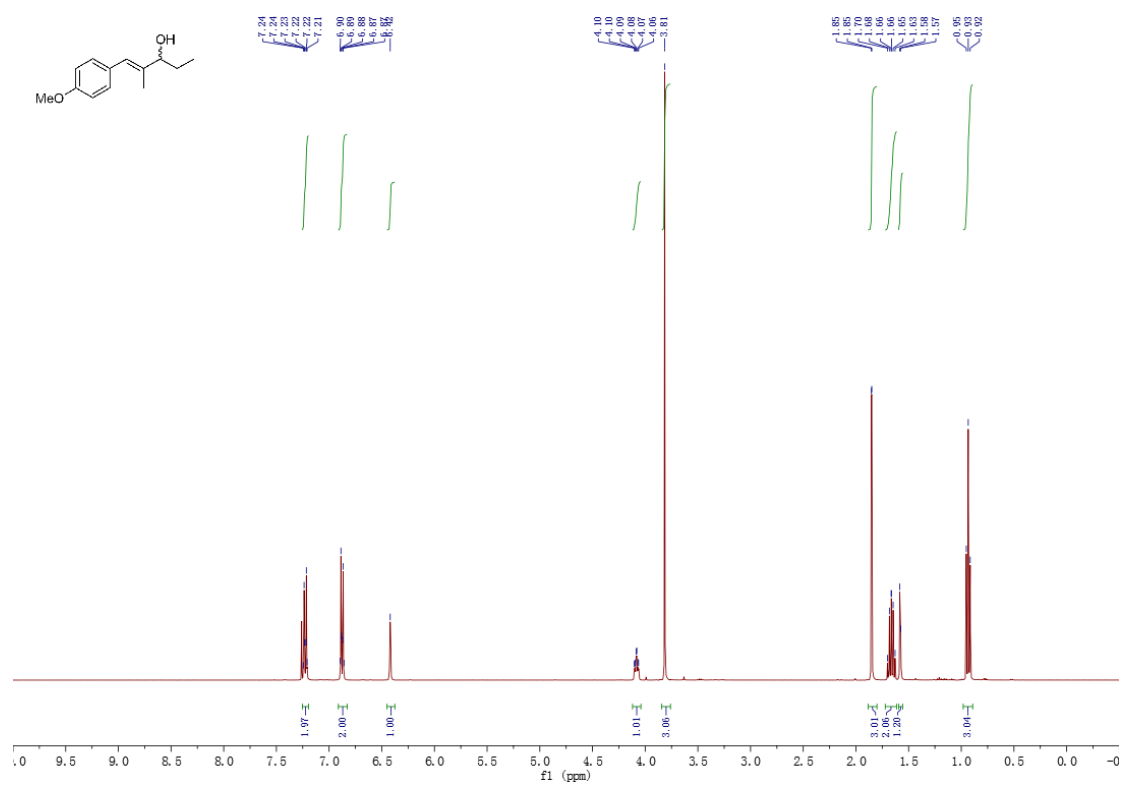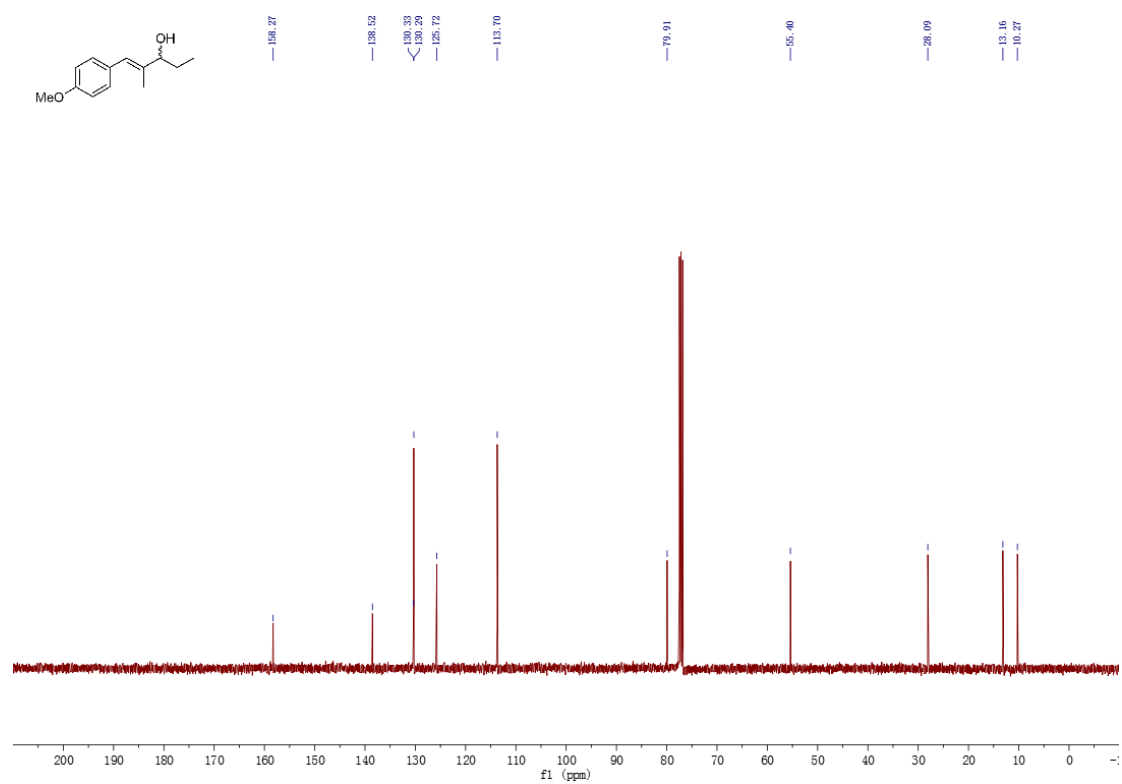

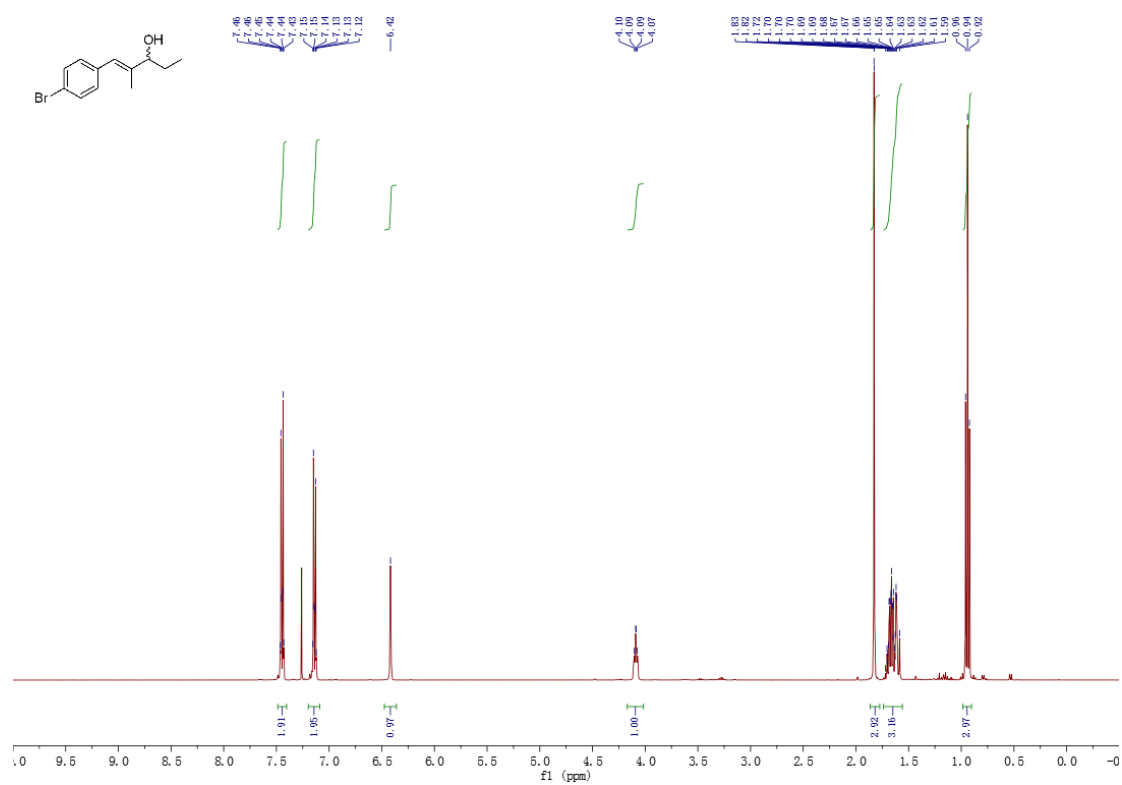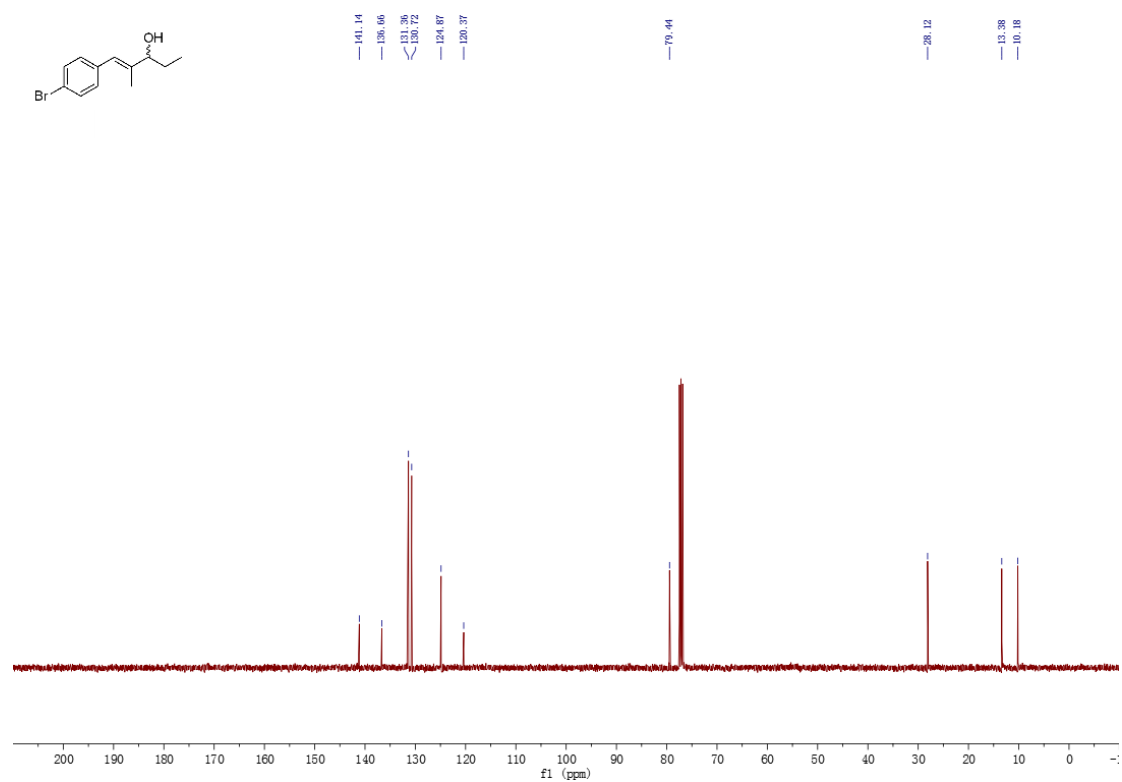



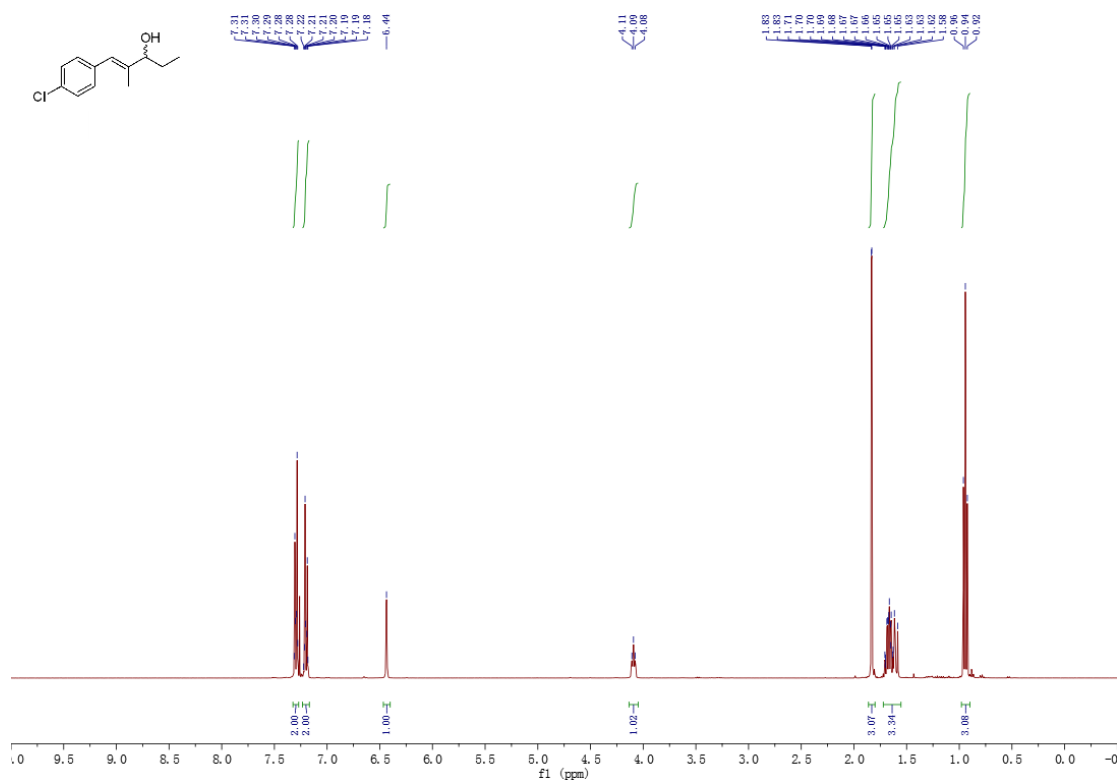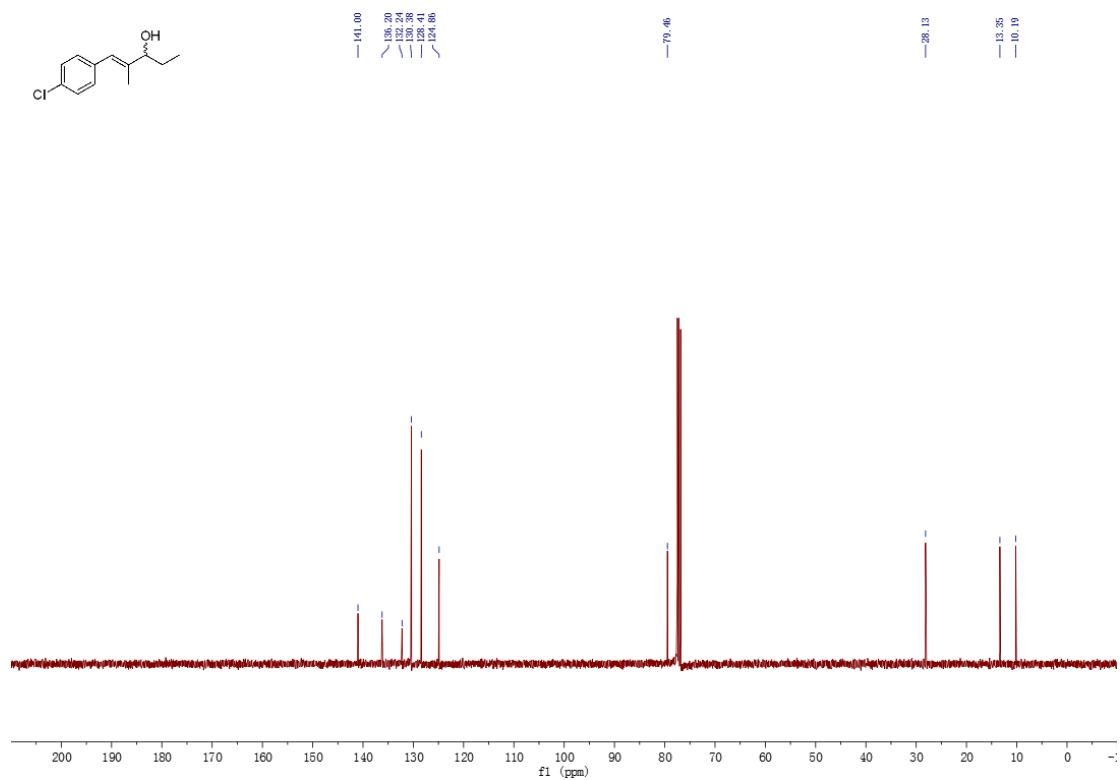

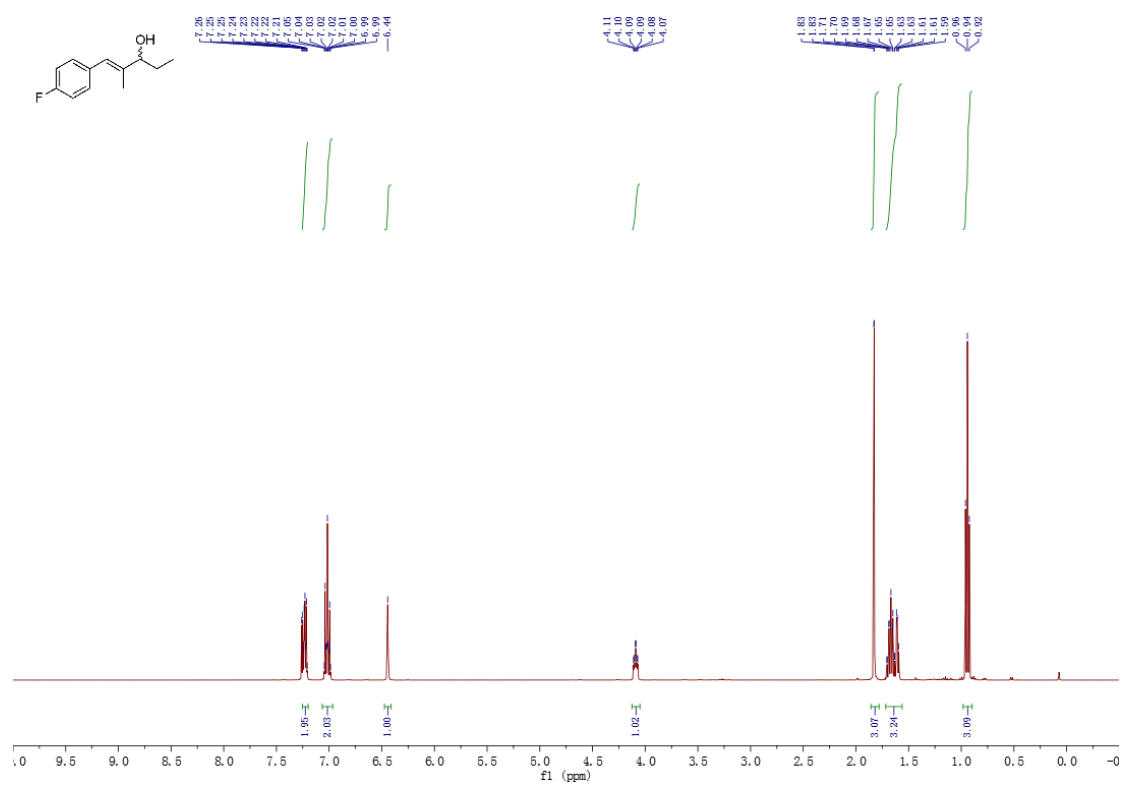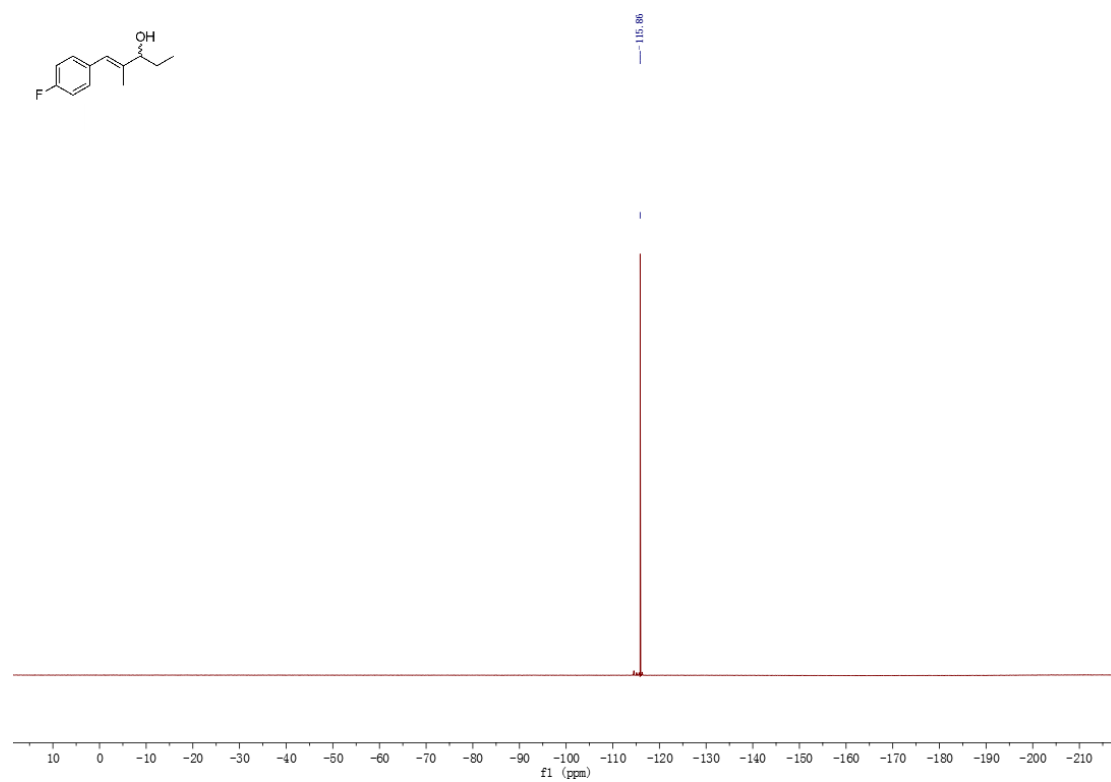

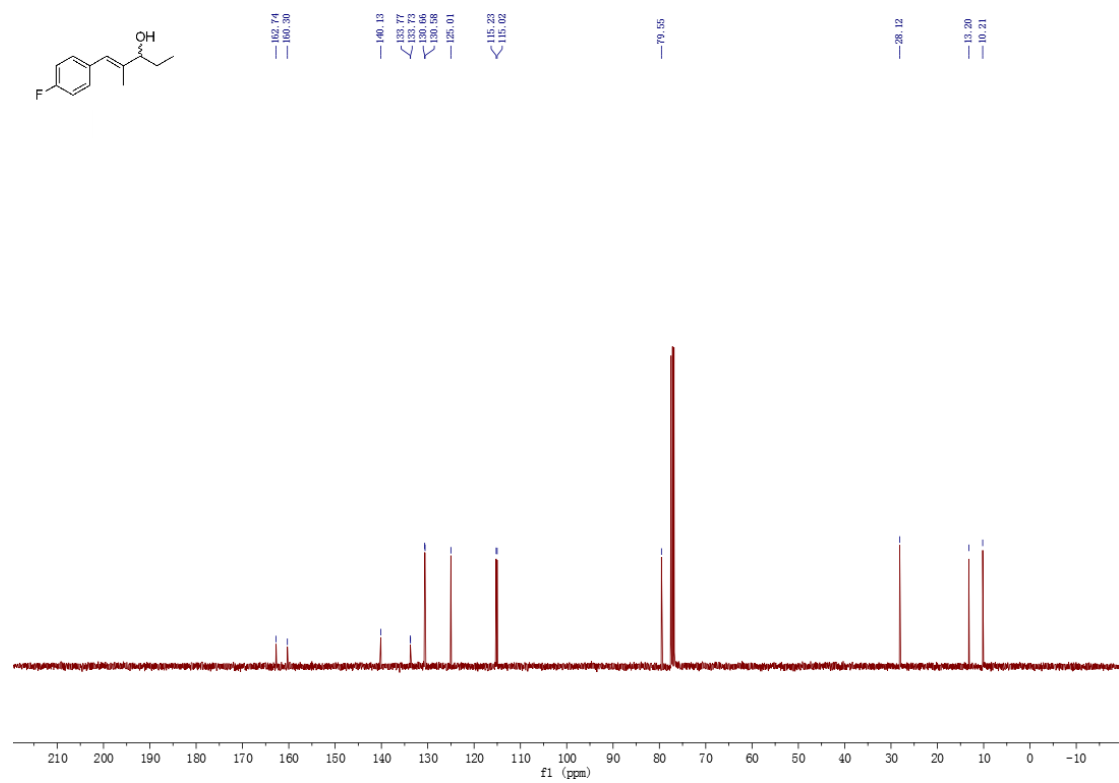

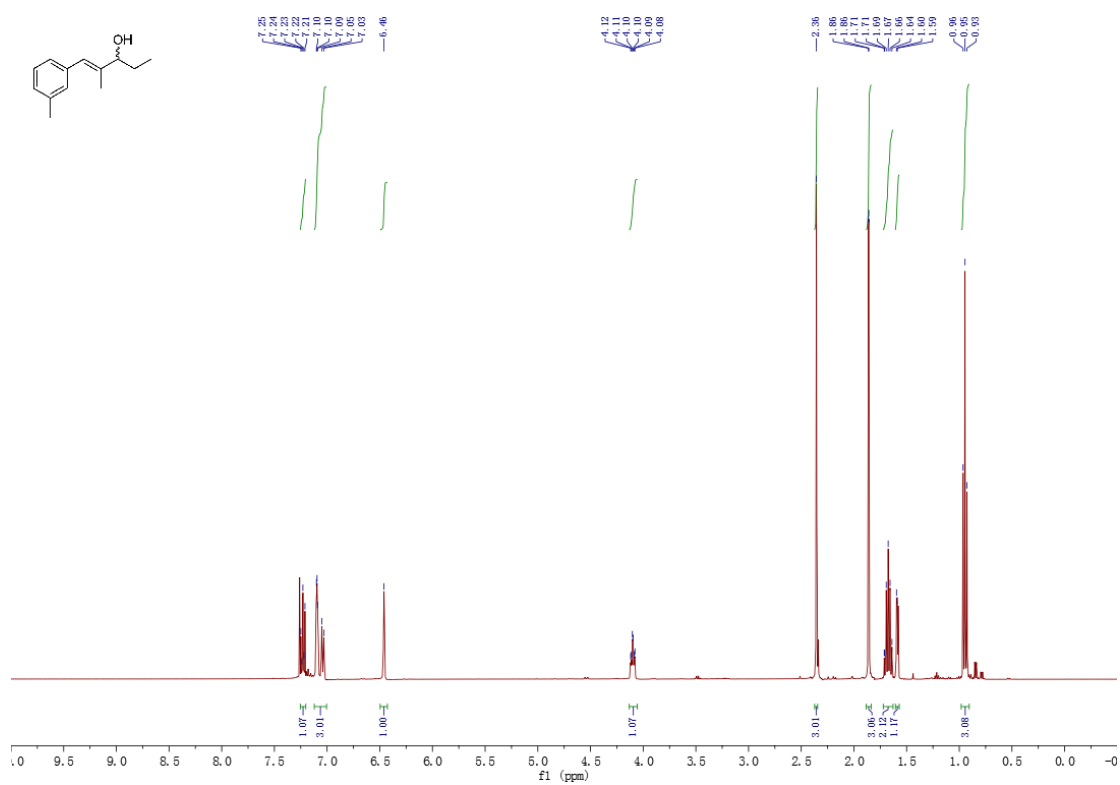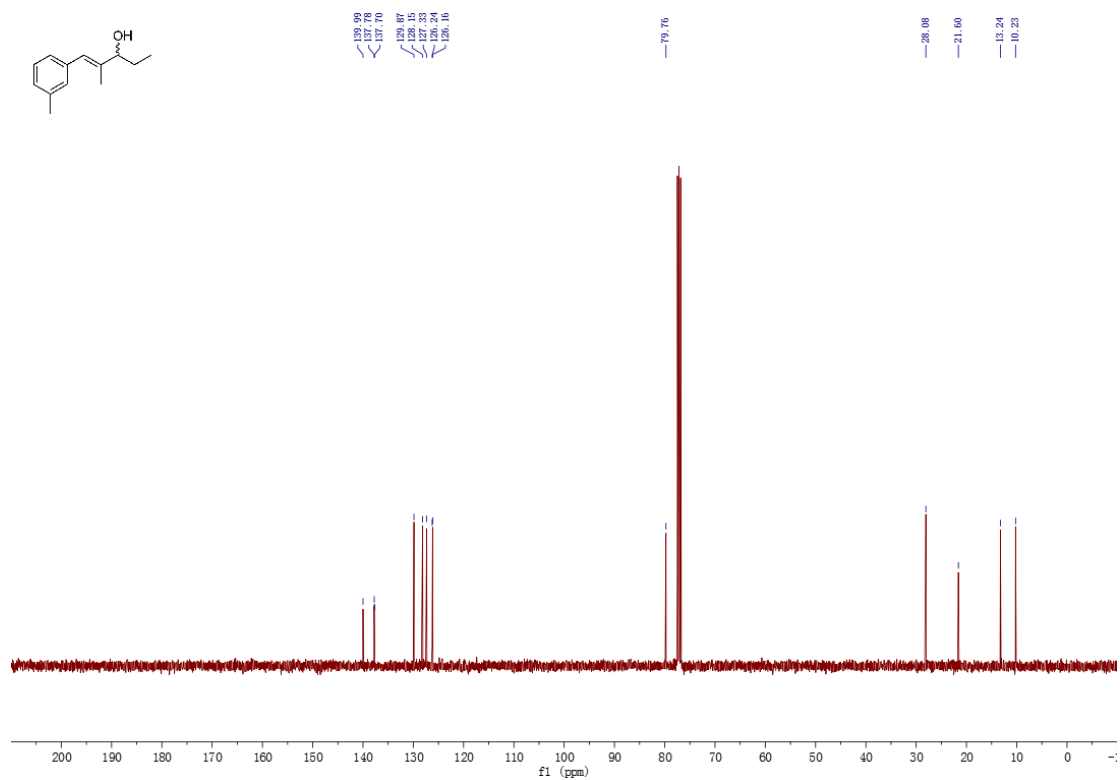

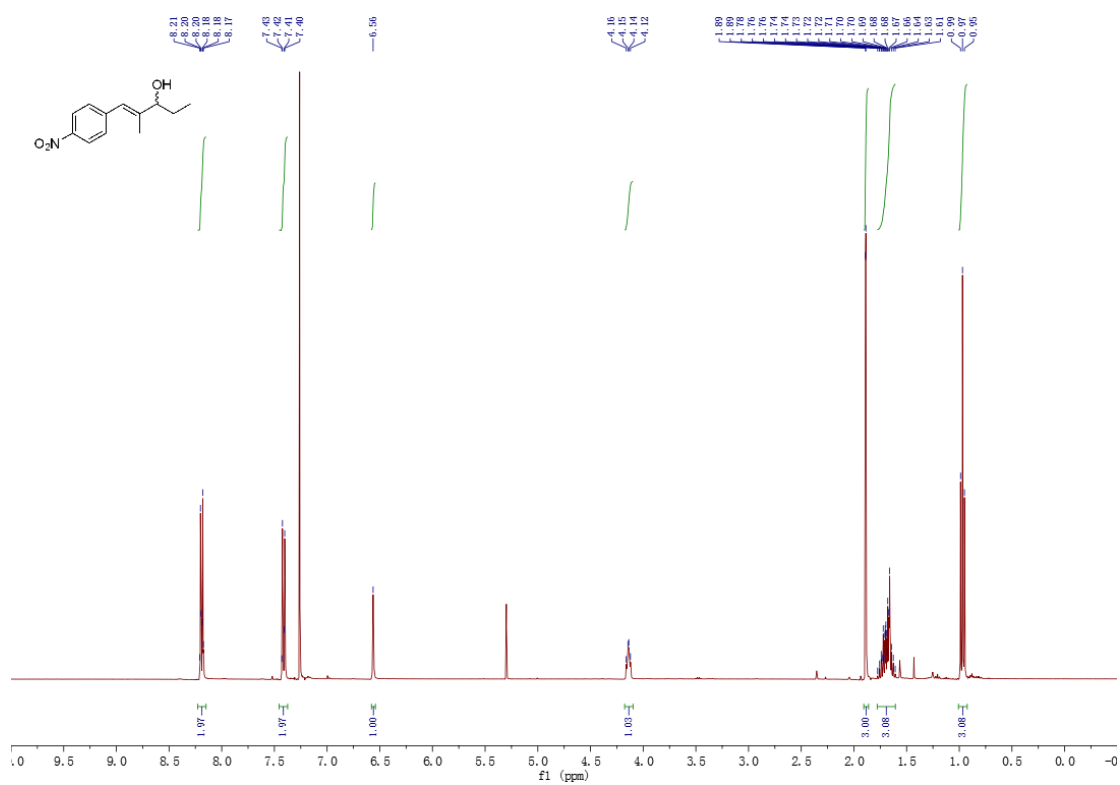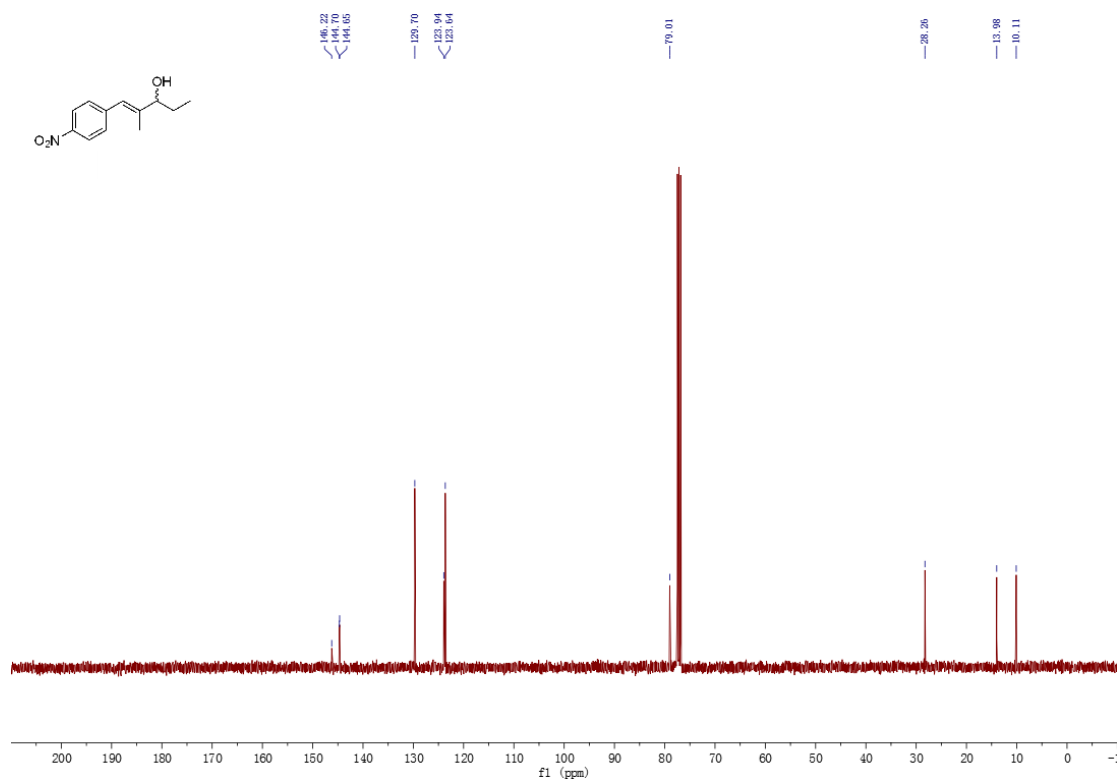

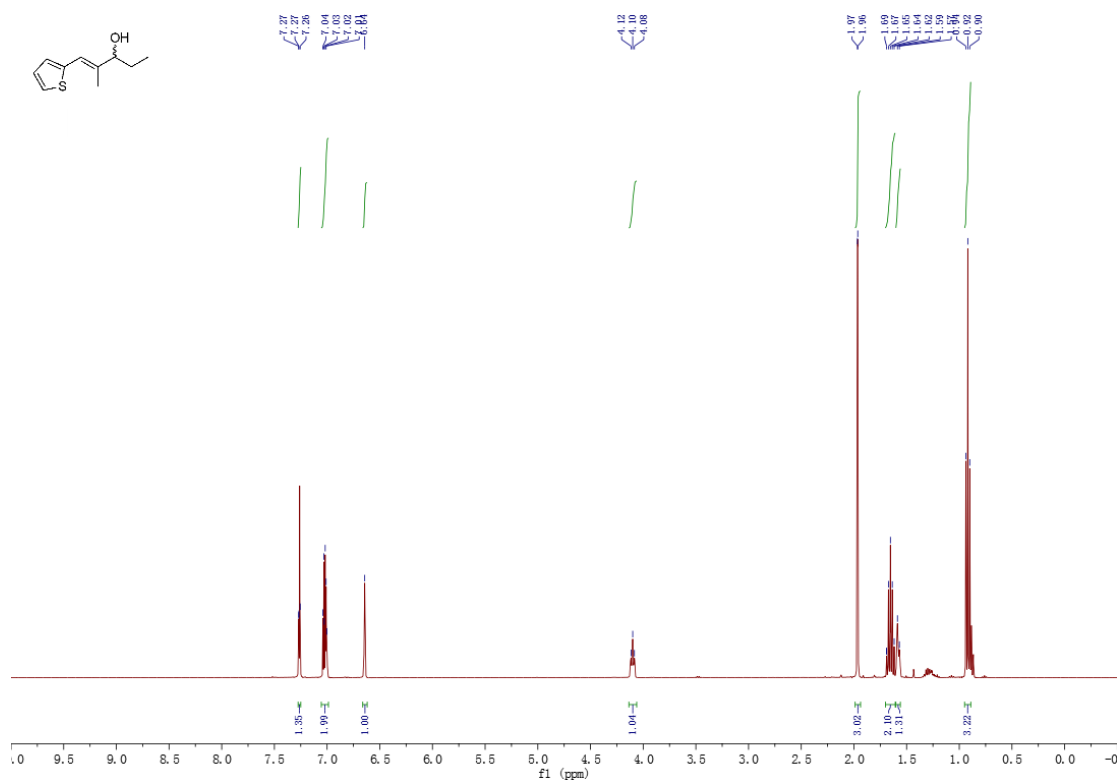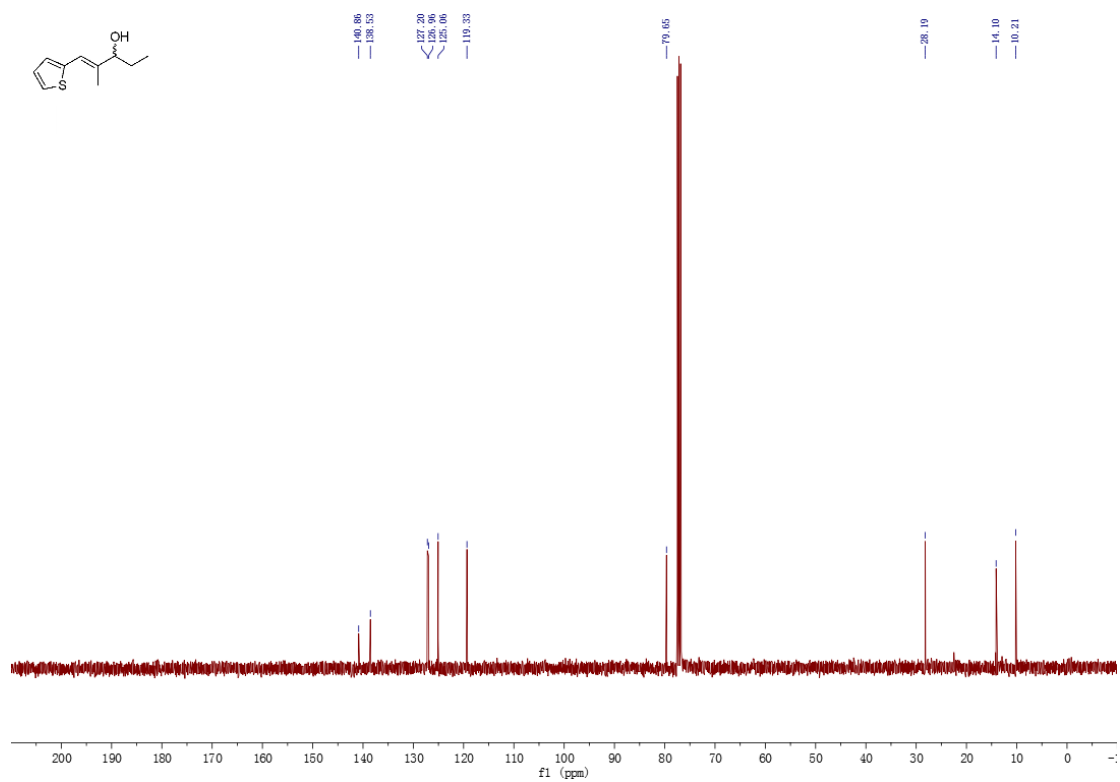

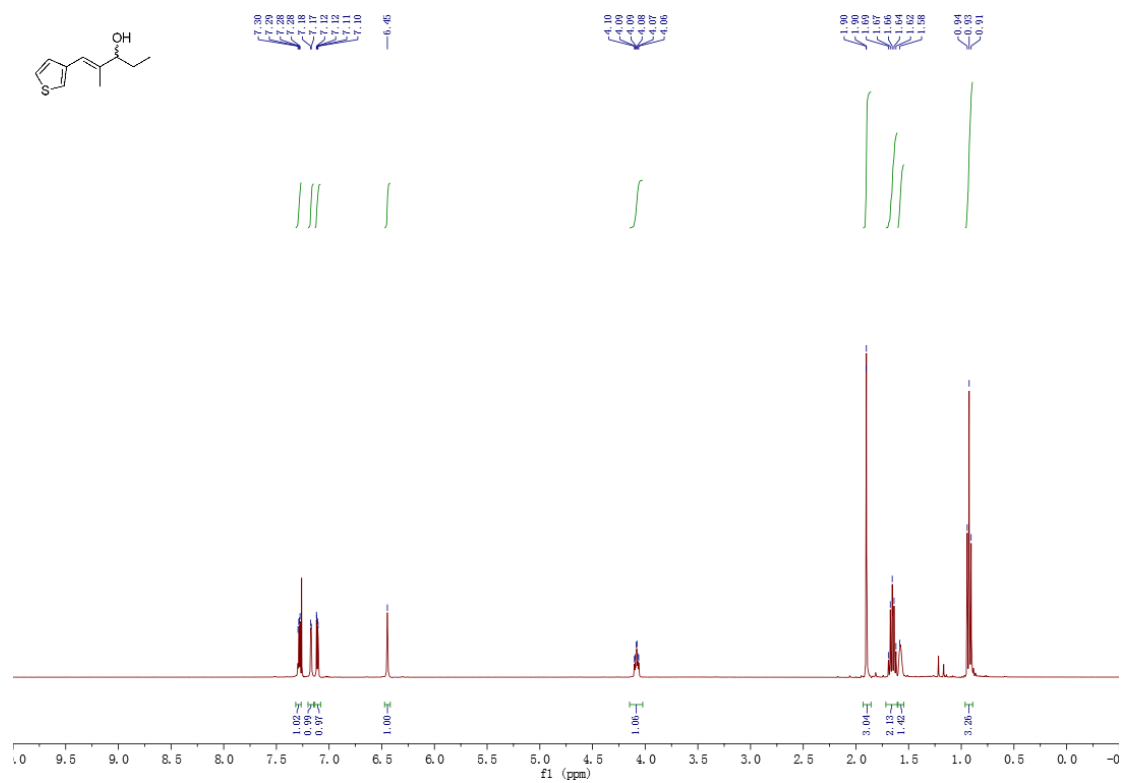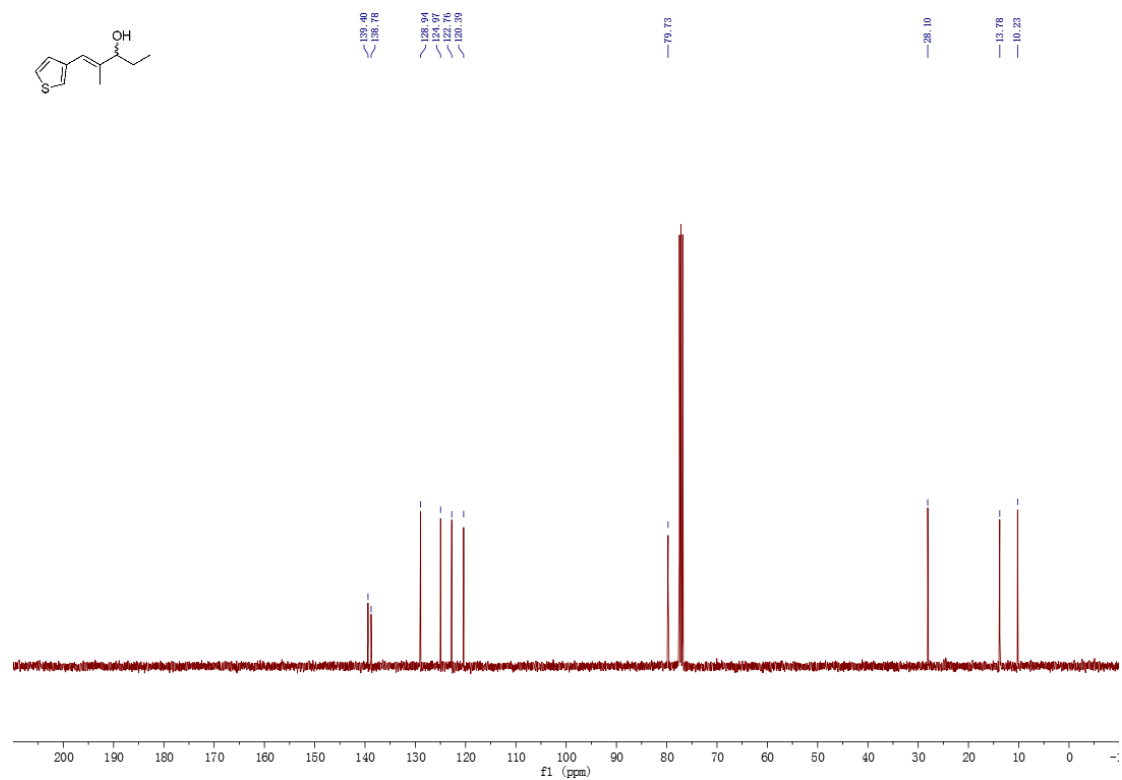





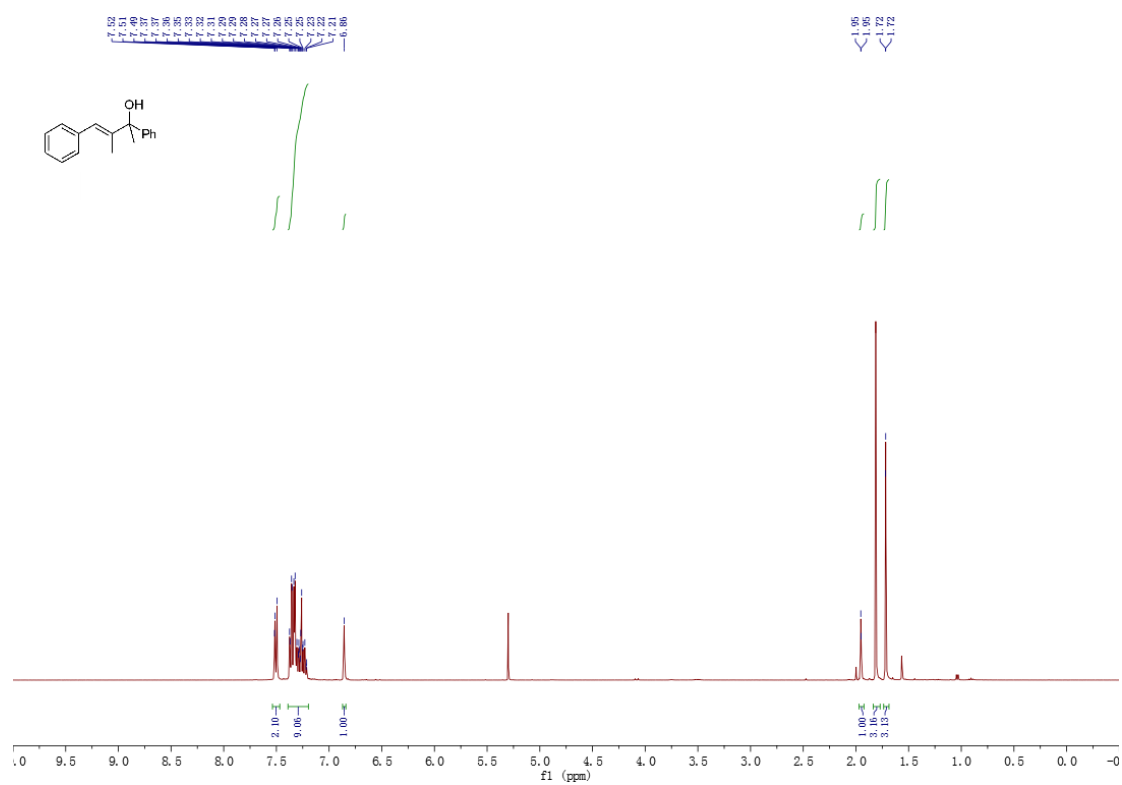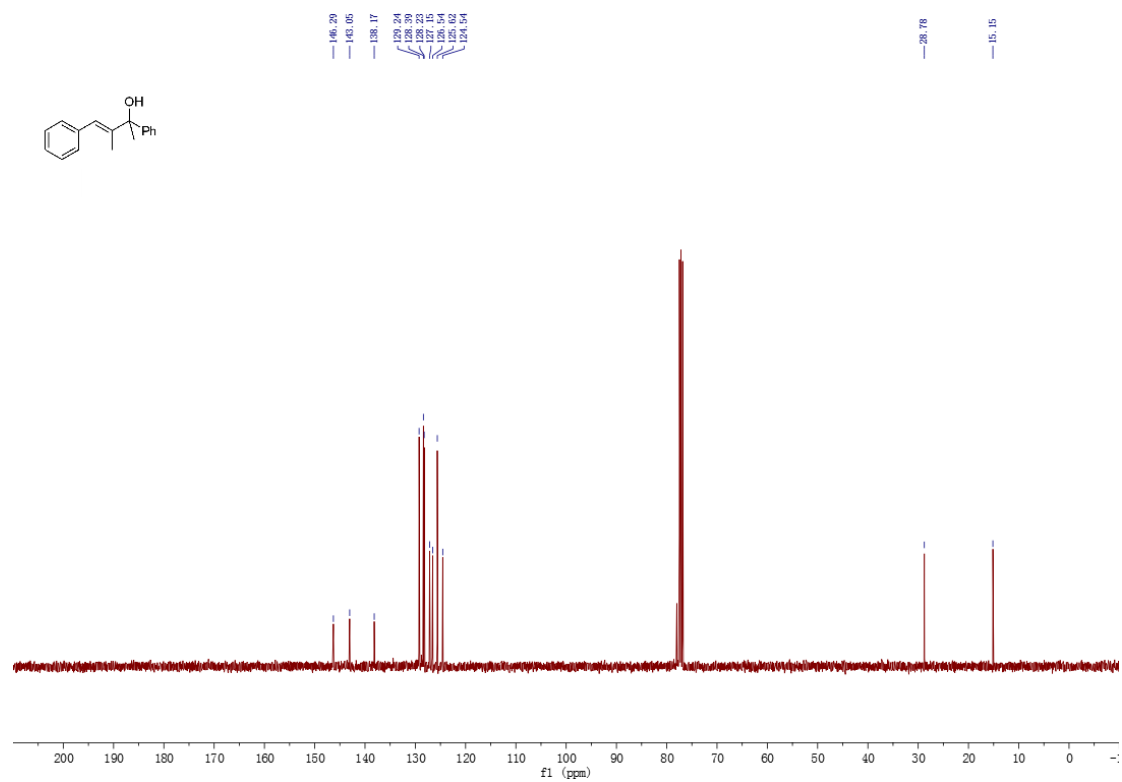

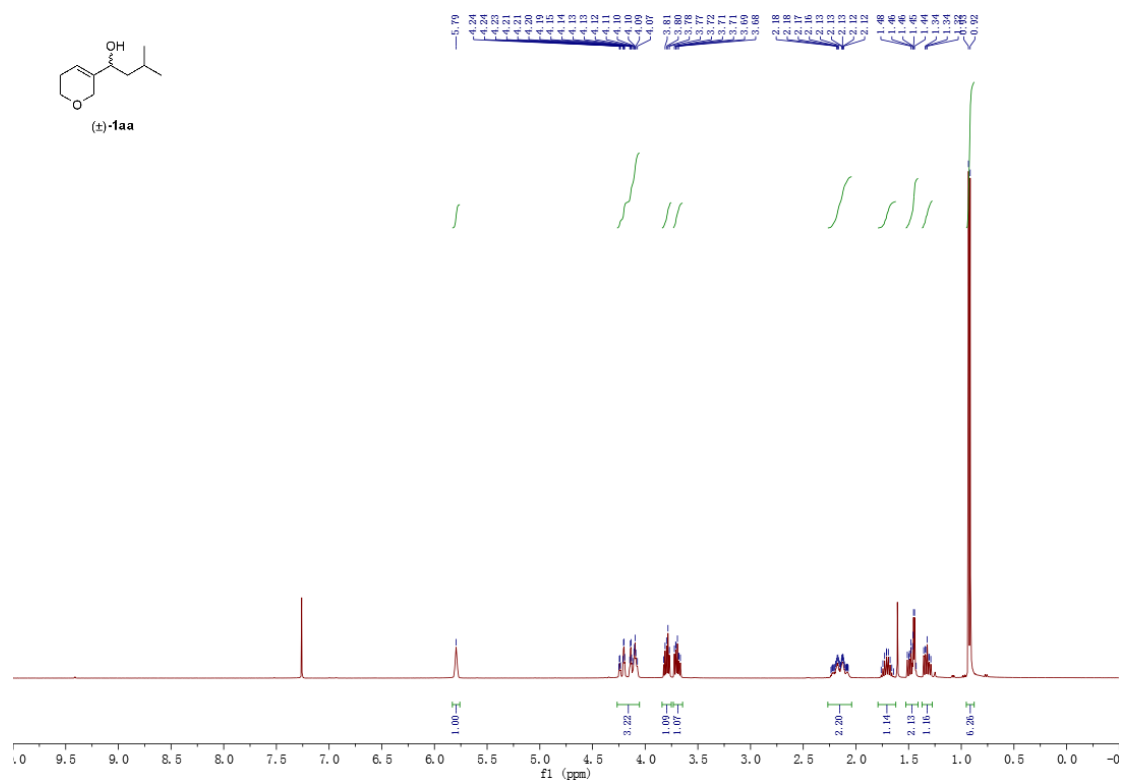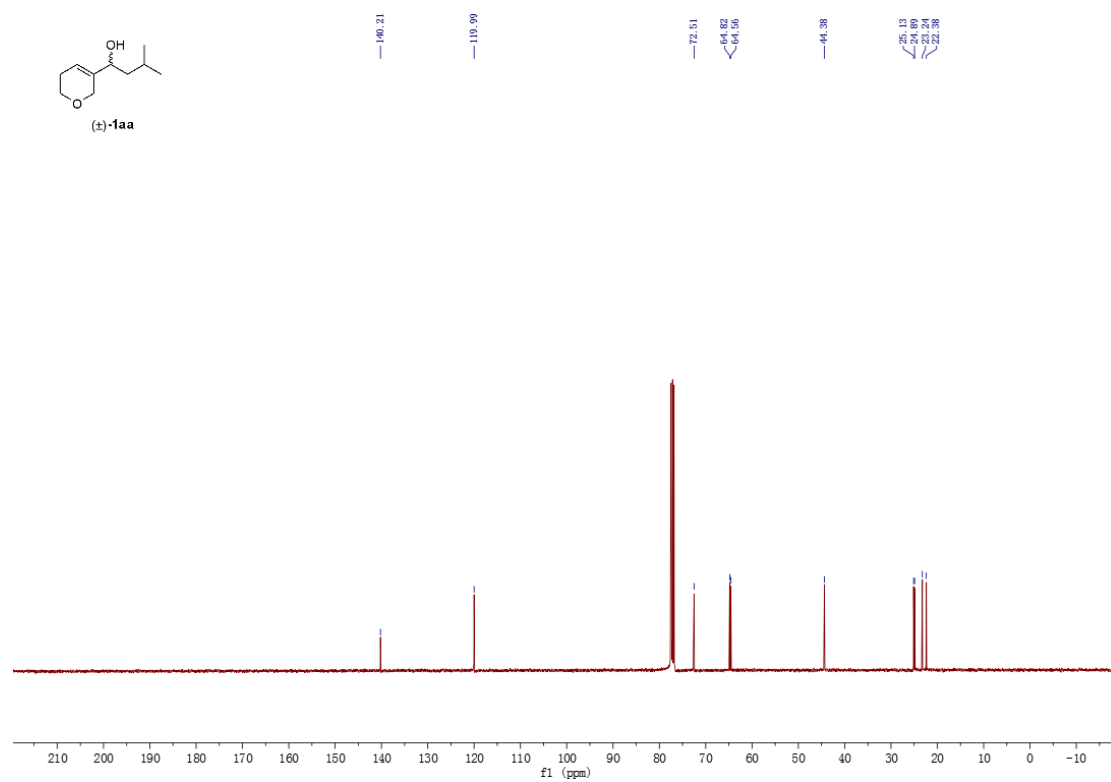

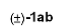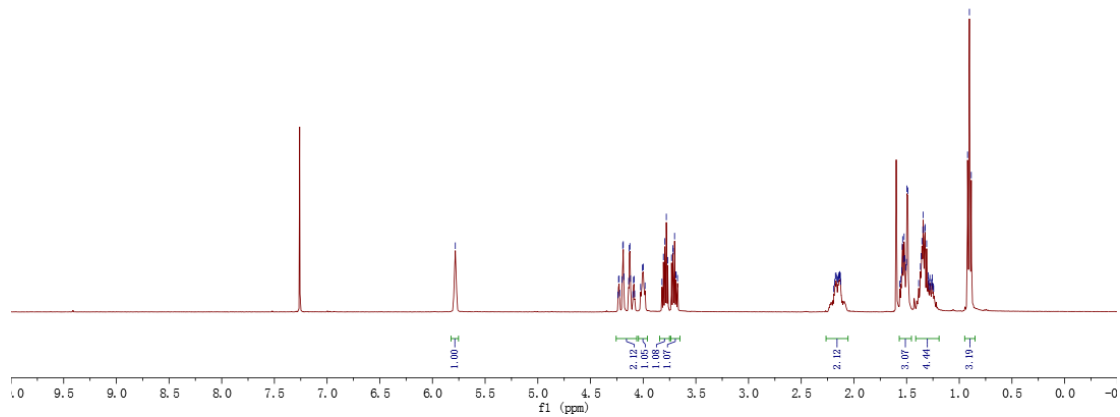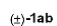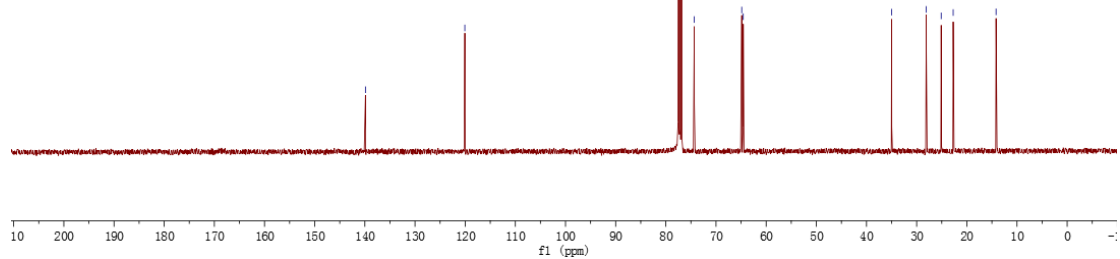

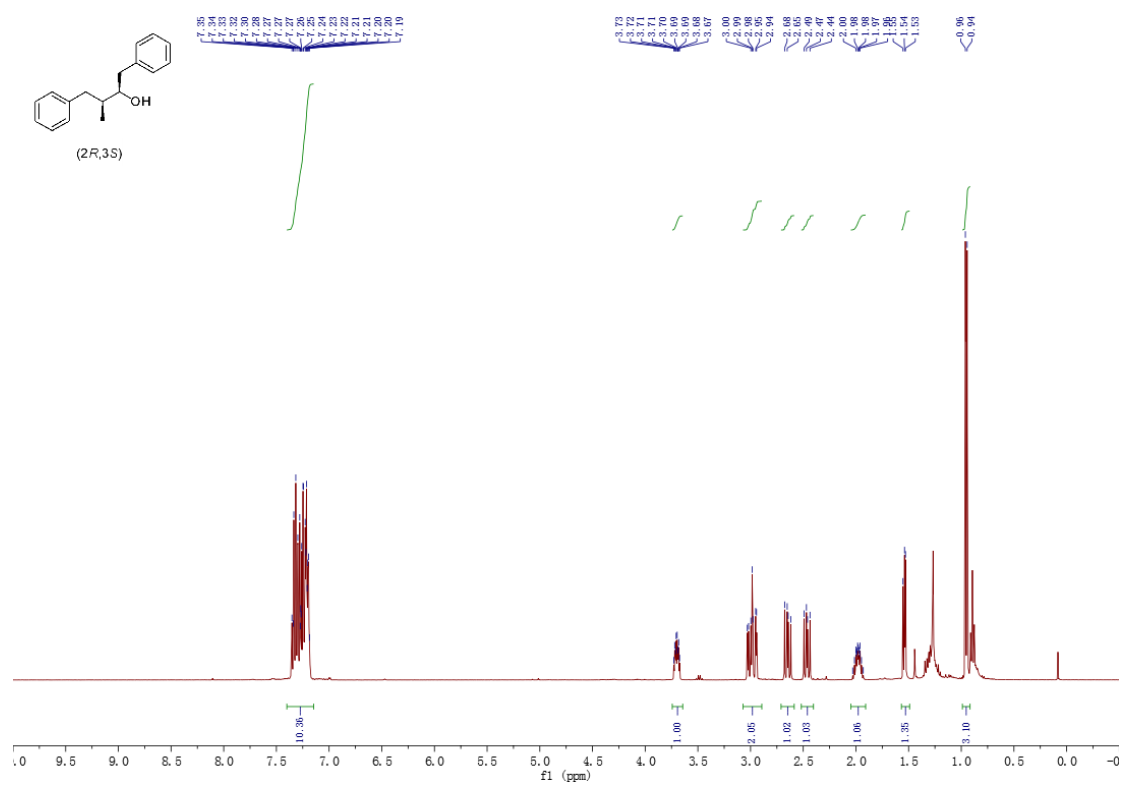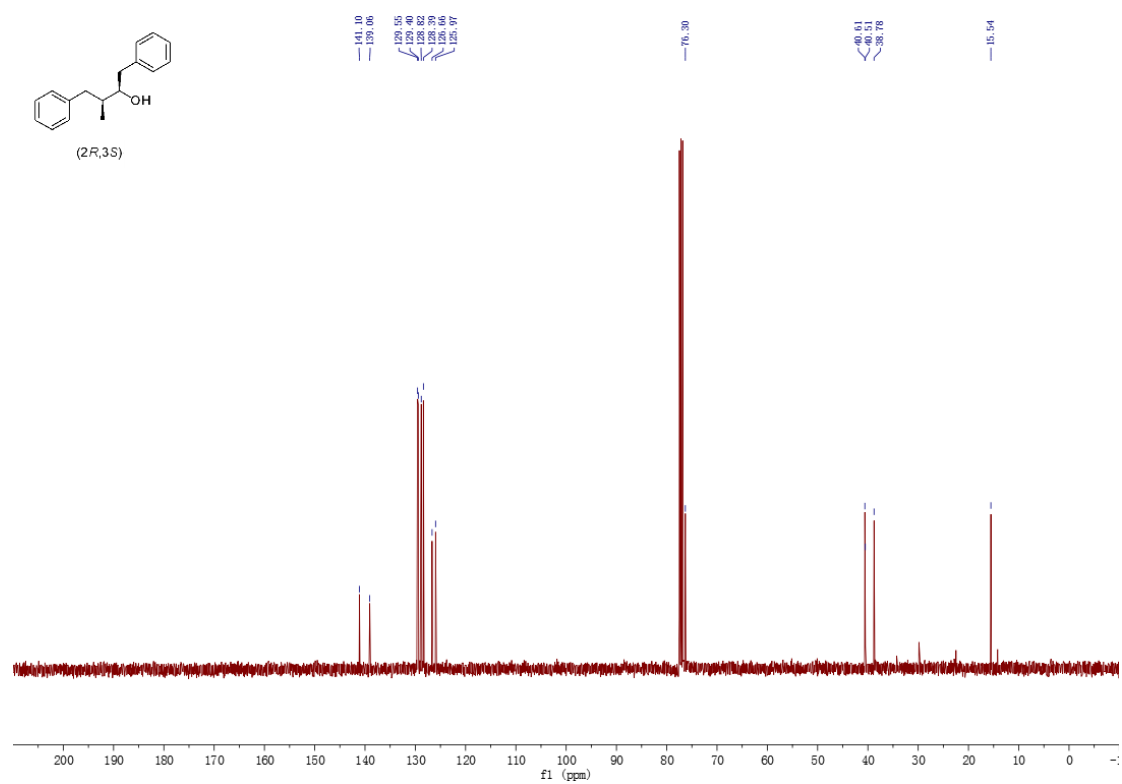

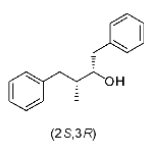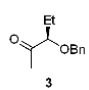

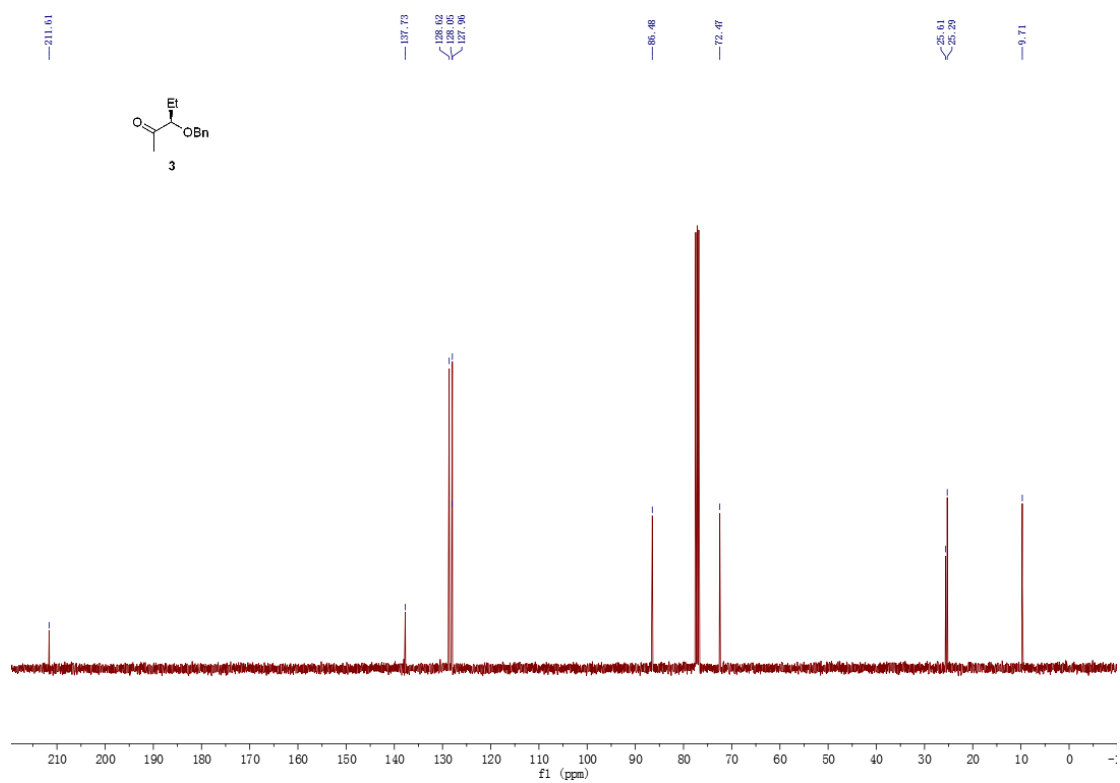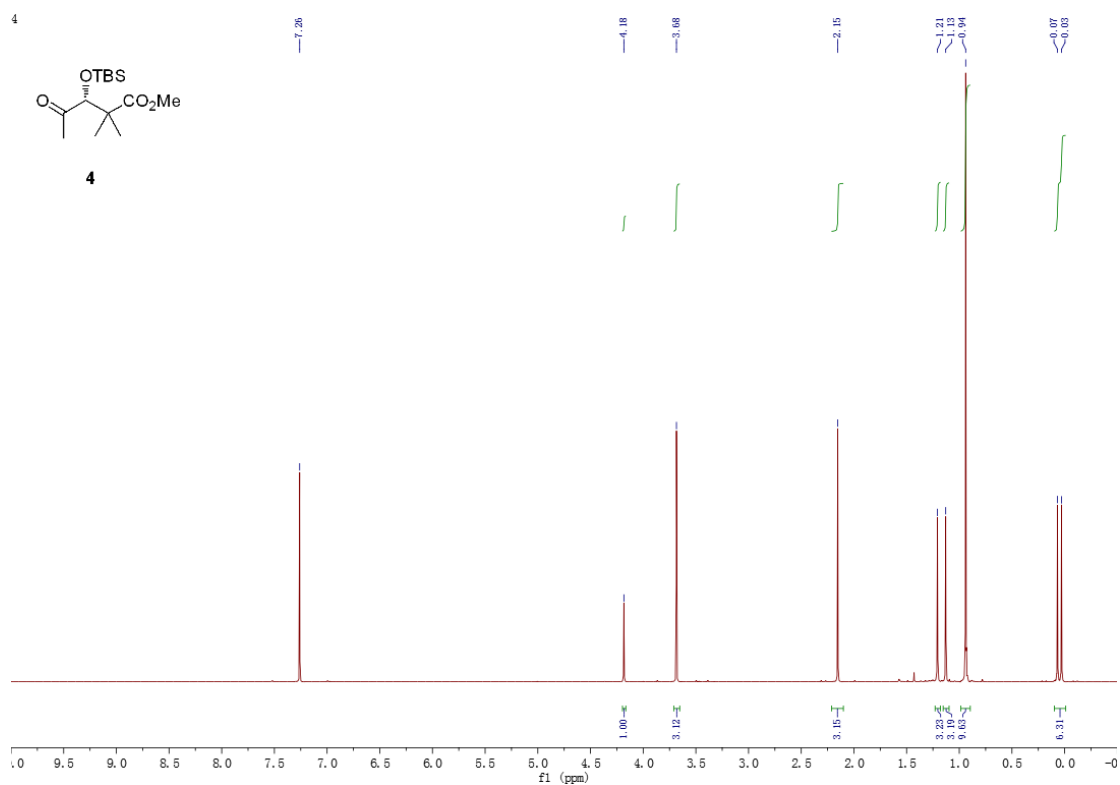

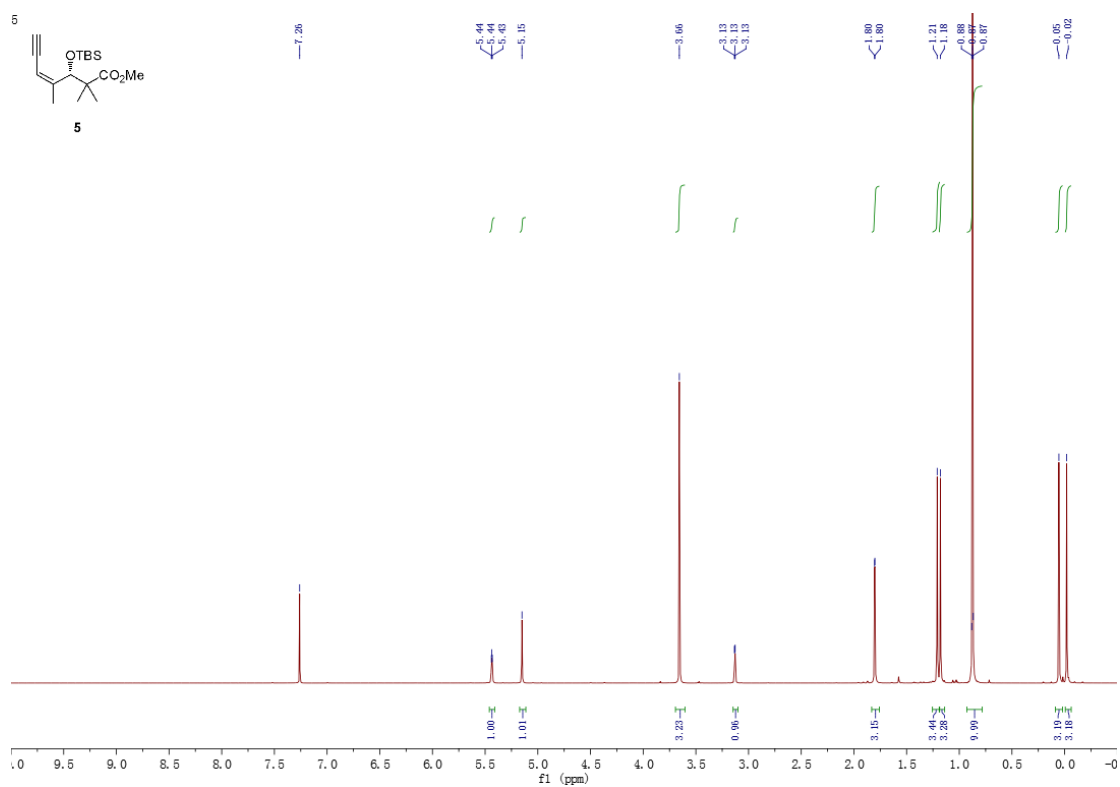

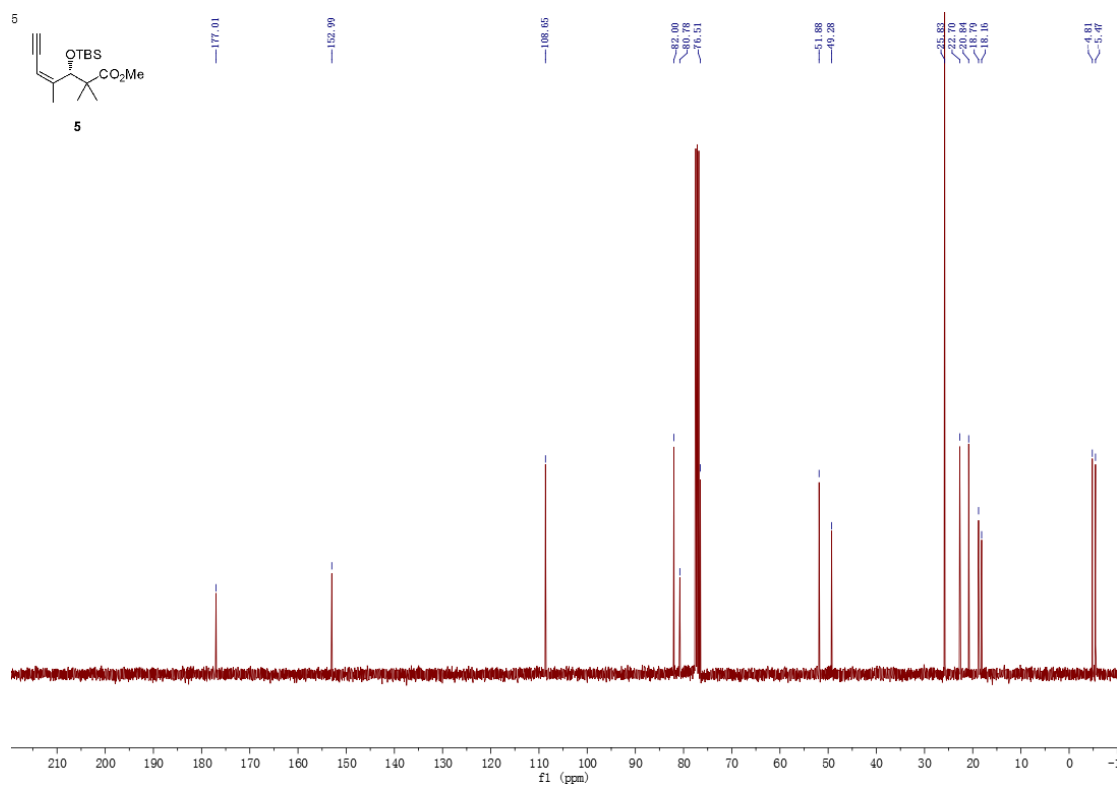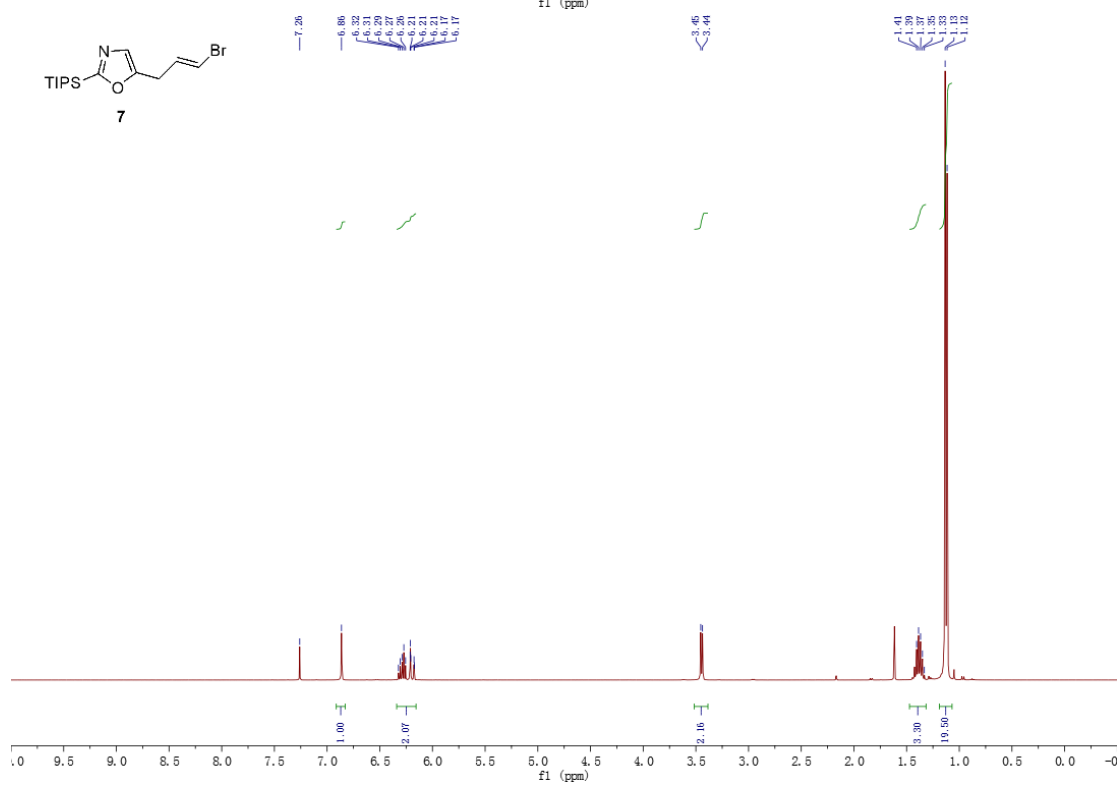



11

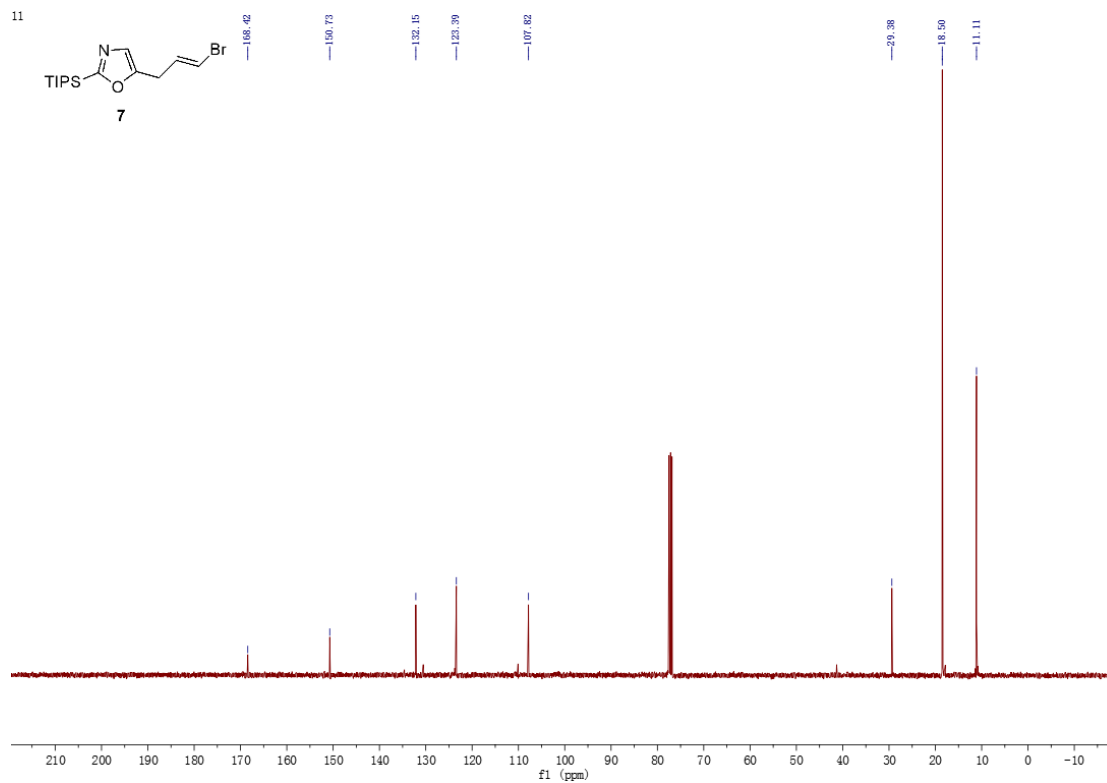

hvu-03-190p

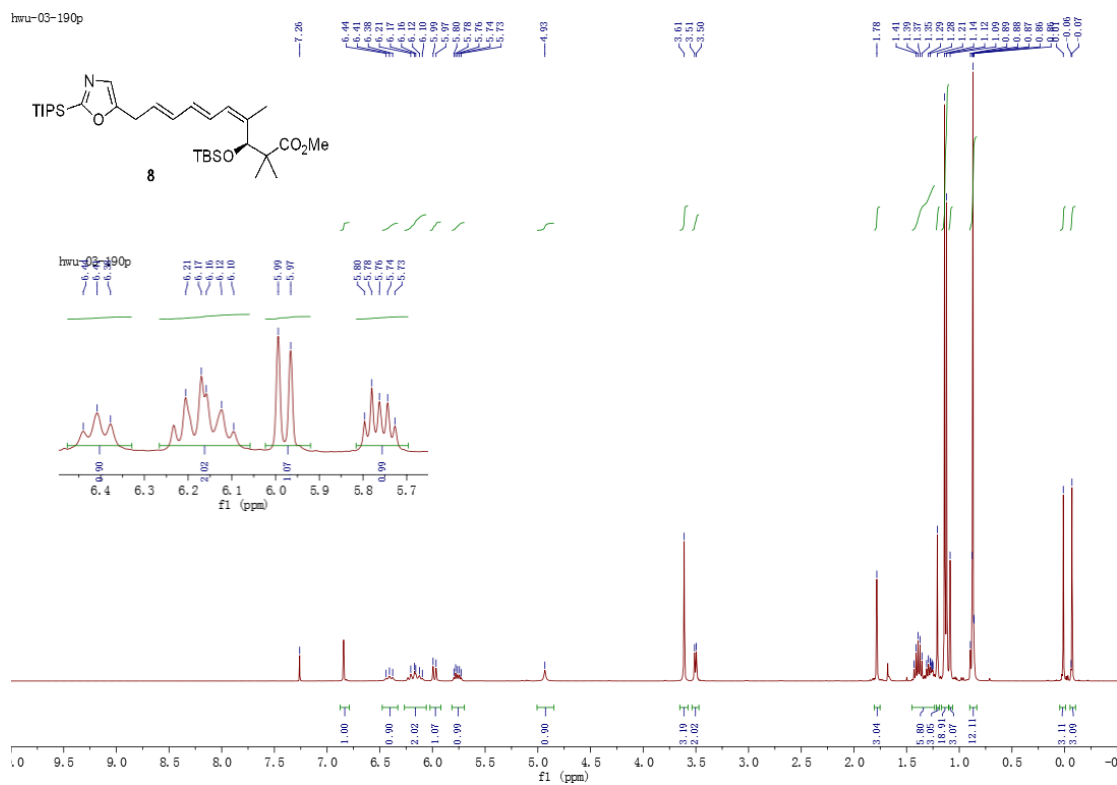

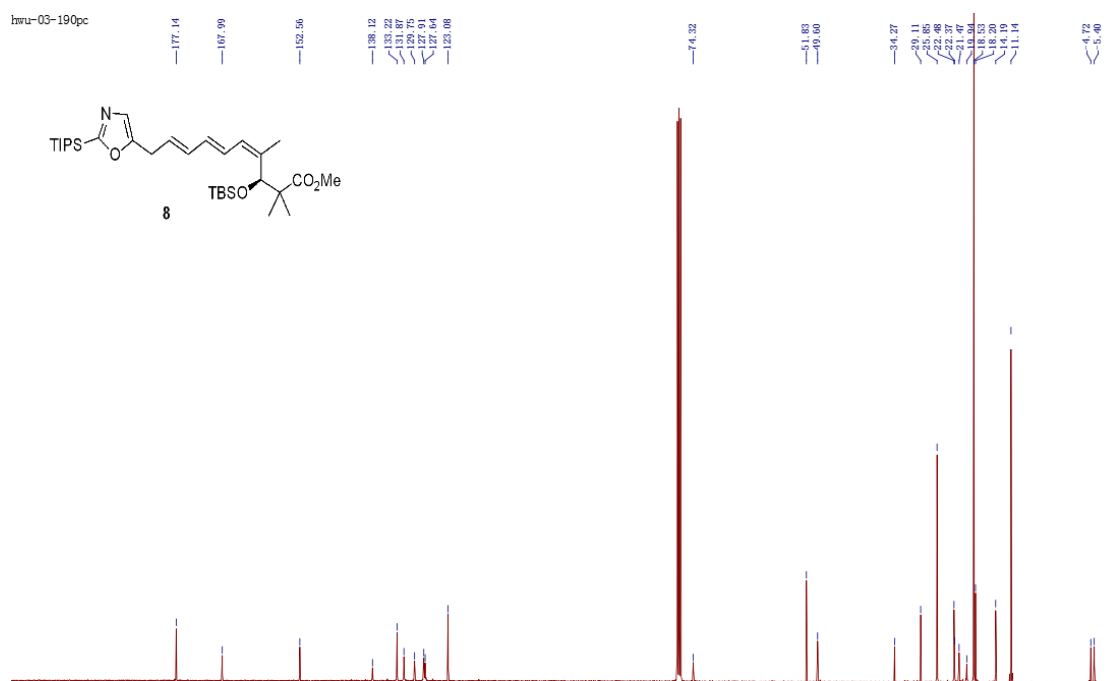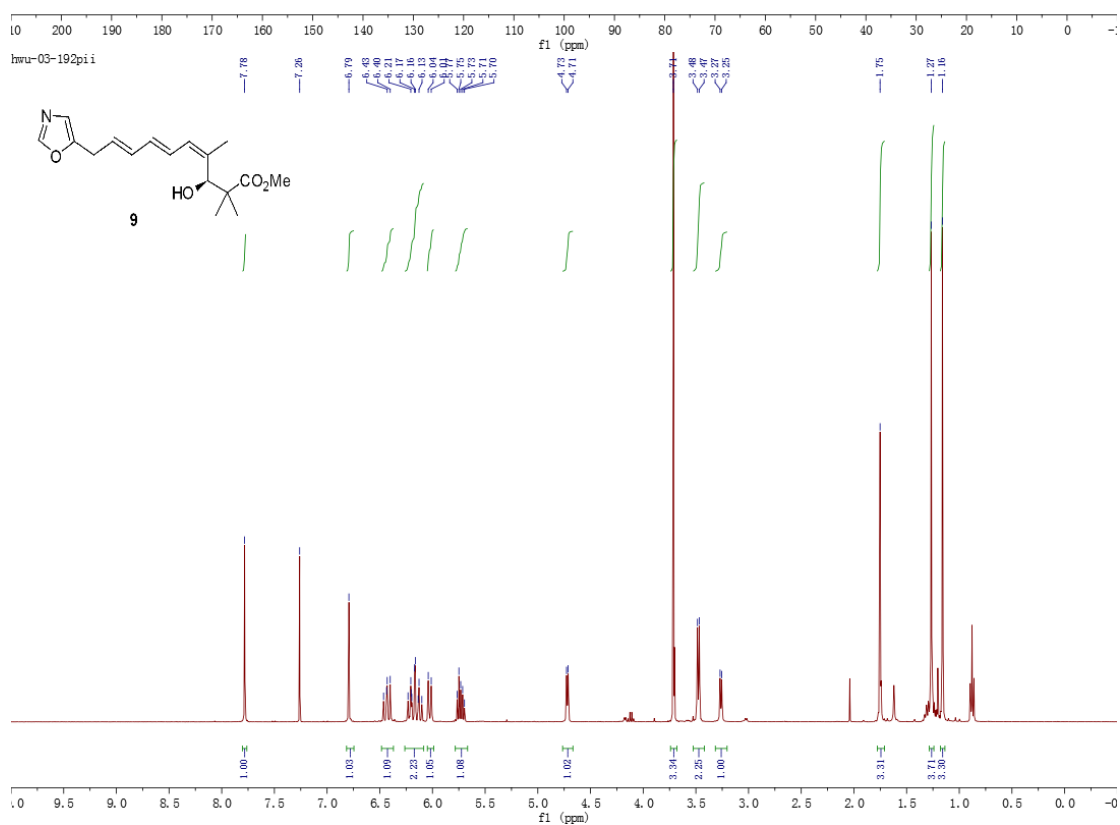

hnu-03-192pic

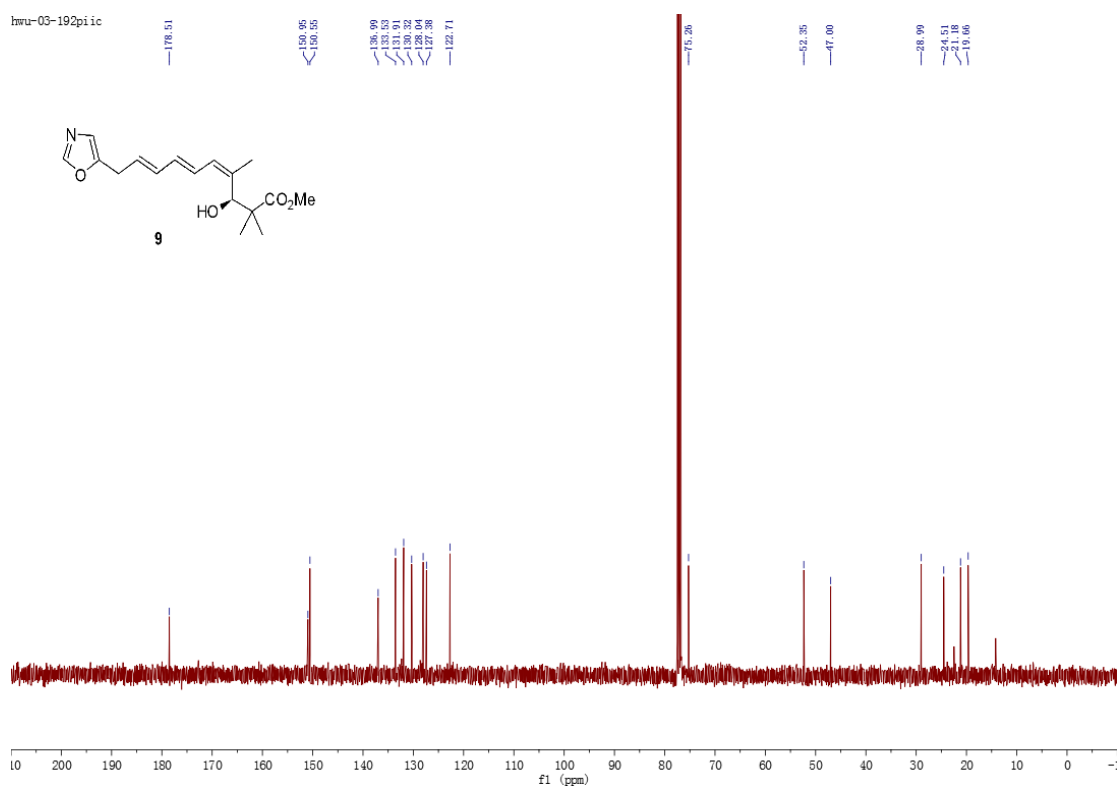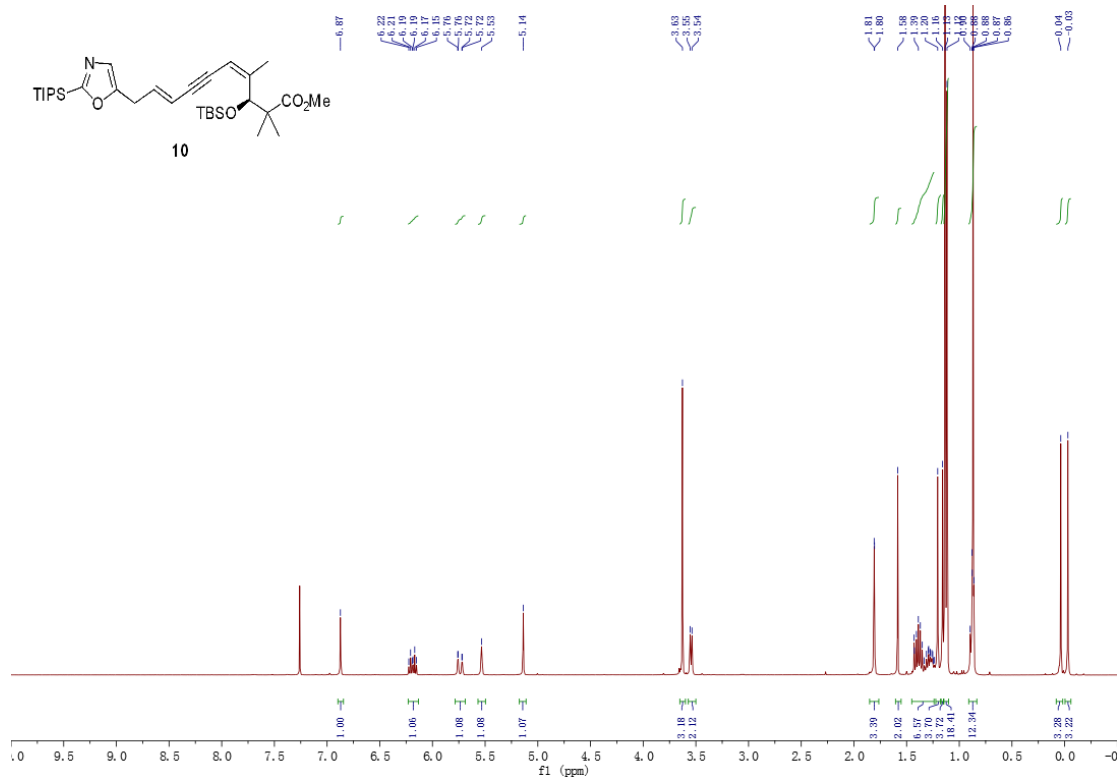

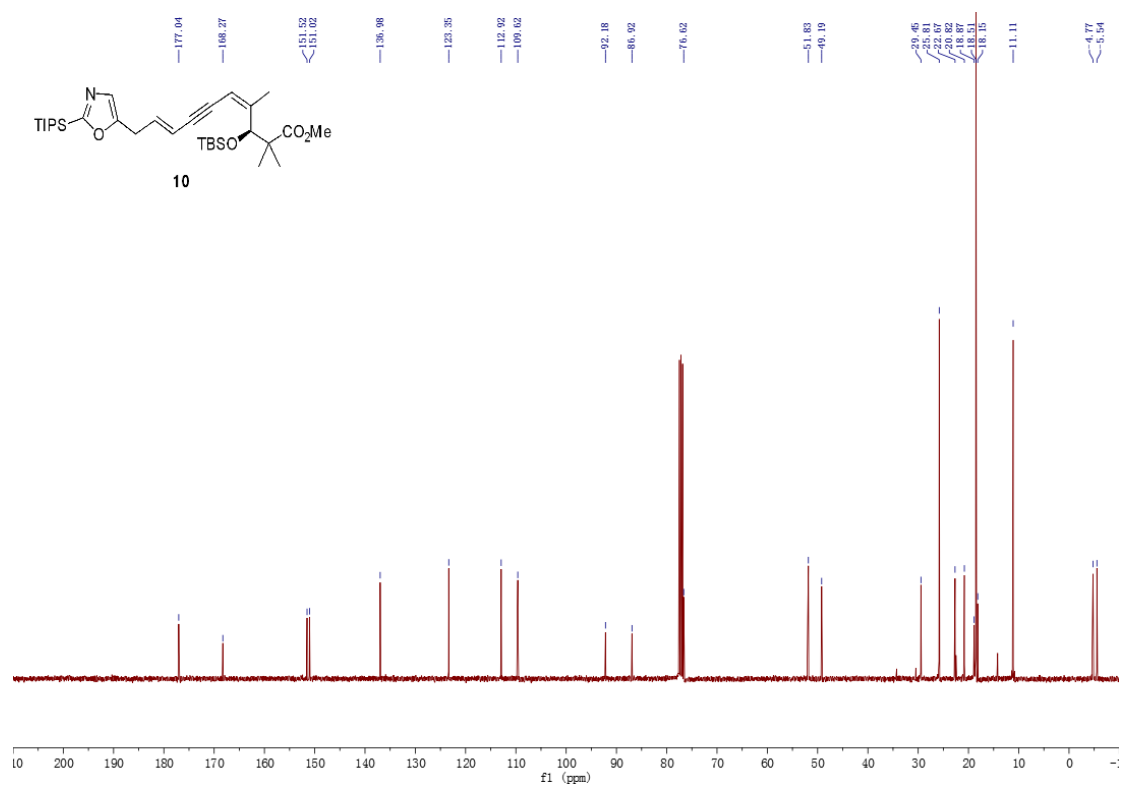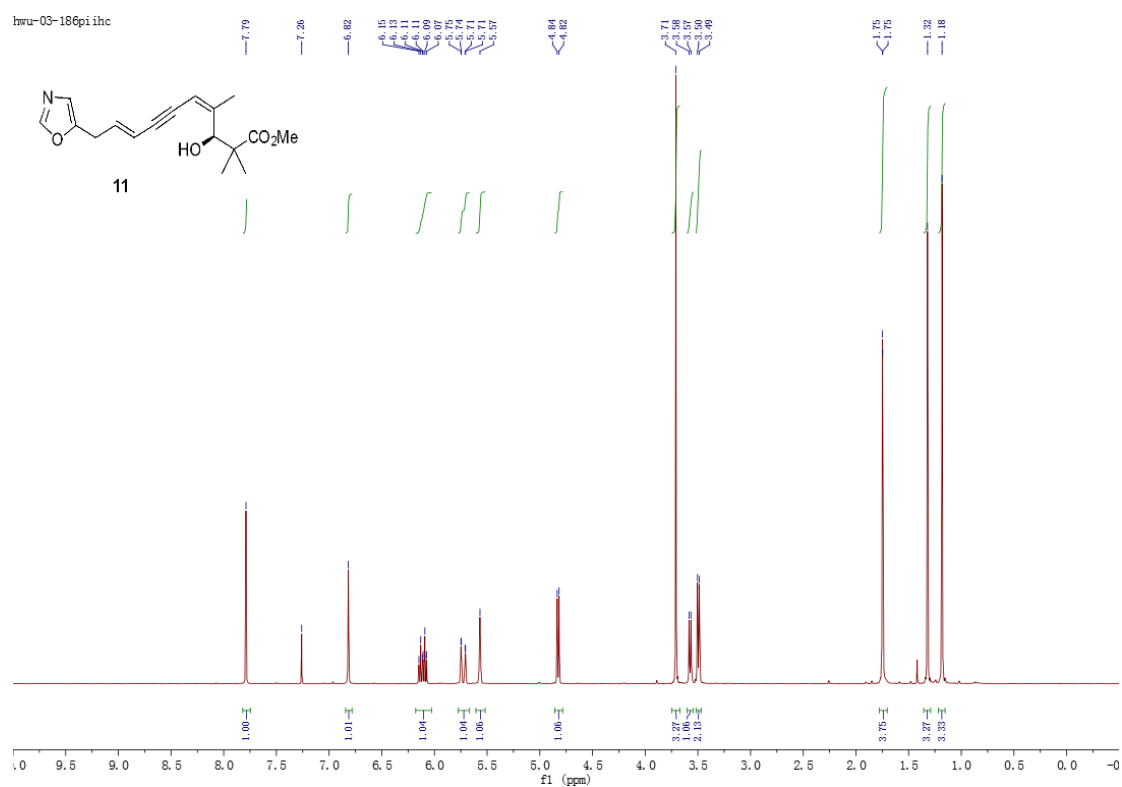

hnu-03-186pi:c

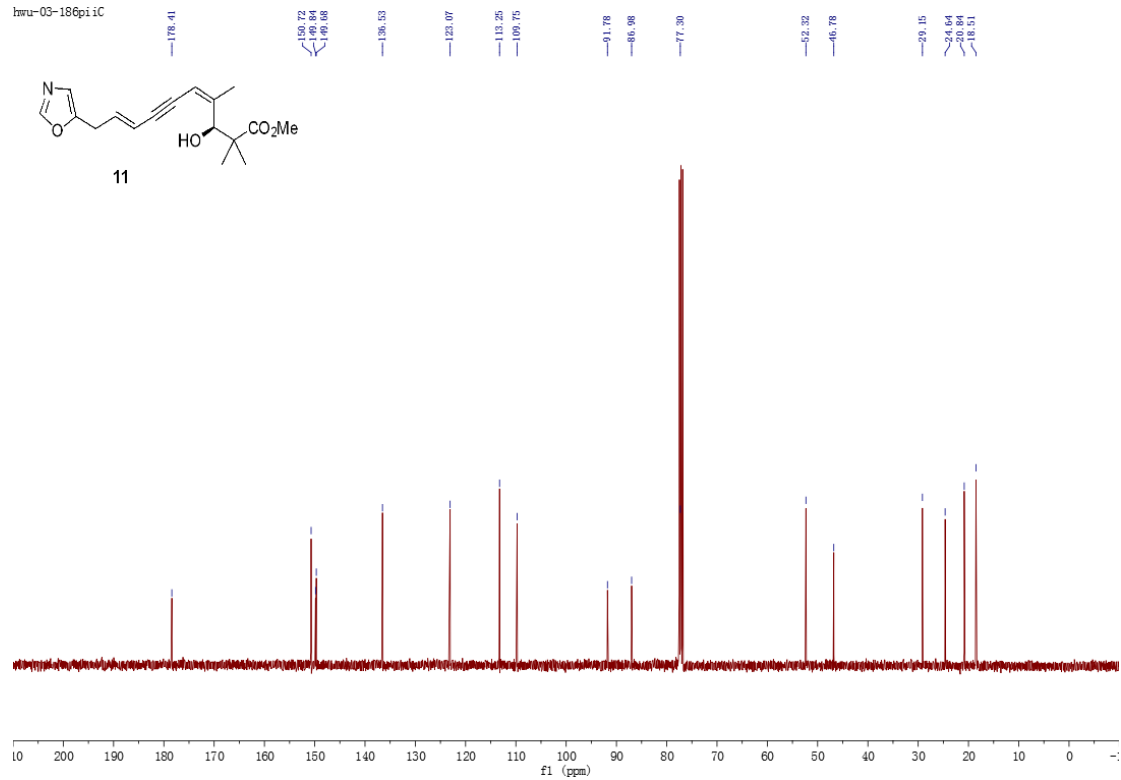

# <sup>1</sup>H and <sup>19</sup>F NMR of resolved allylic alcohols

hvu-190211-203-56asmr. 10. fid

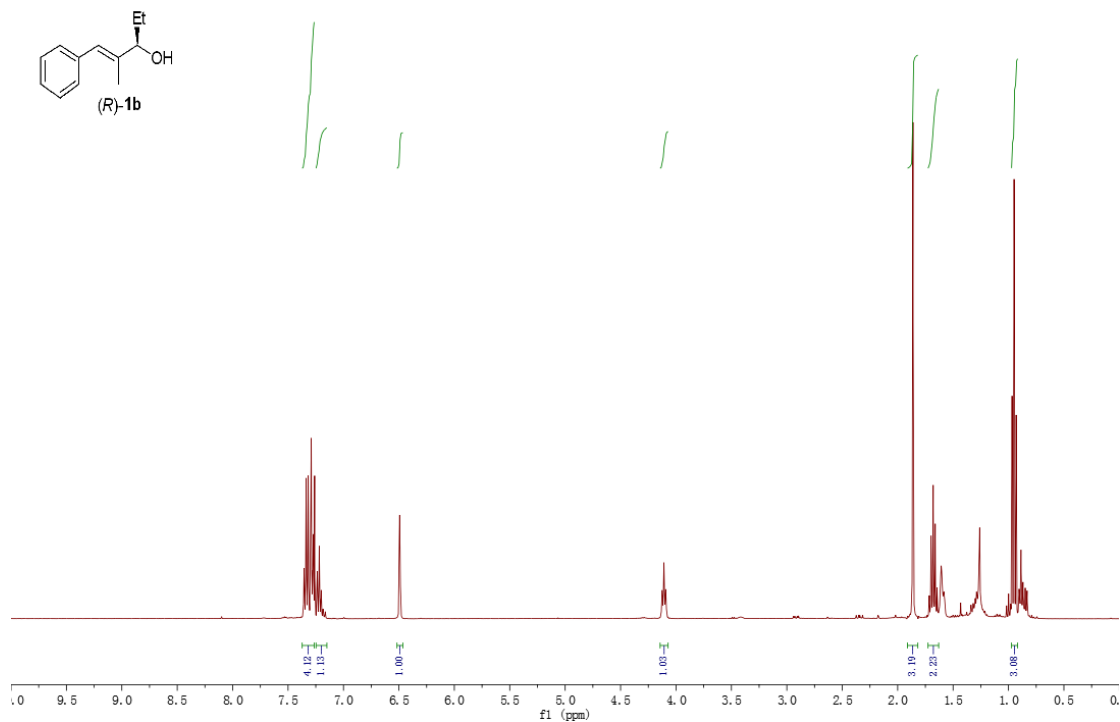

hvu-190214-203-62a3smr. 10. fid

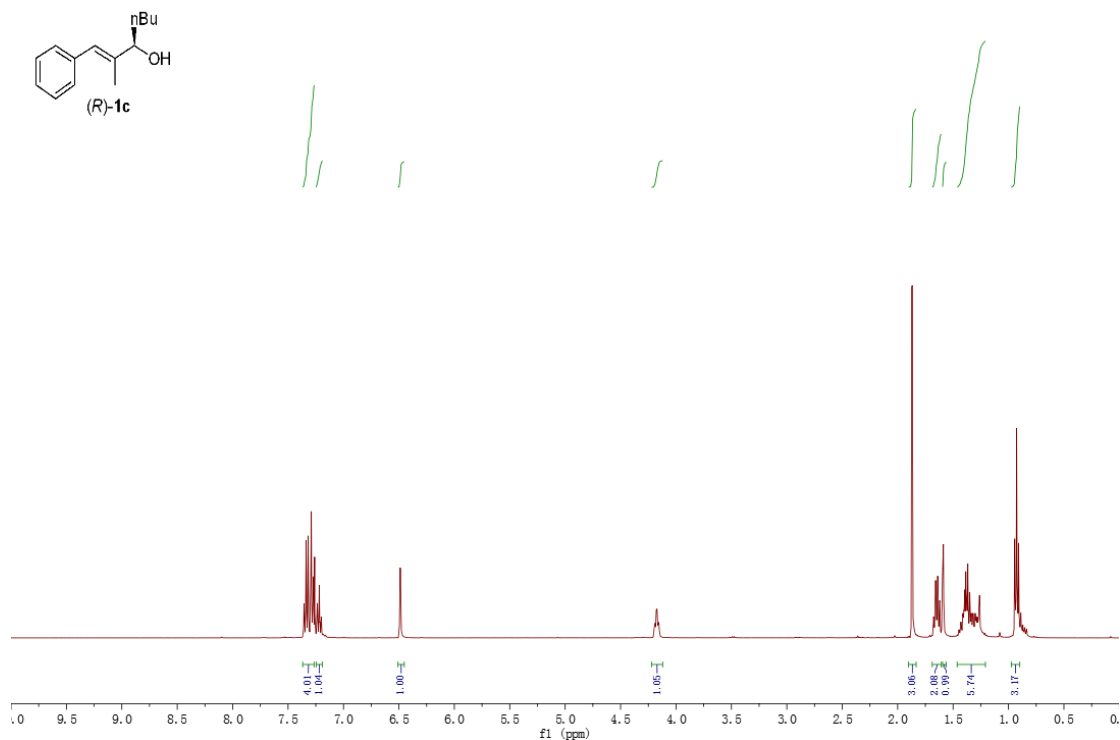

hvu-190219-203-64asmr. 10. fid

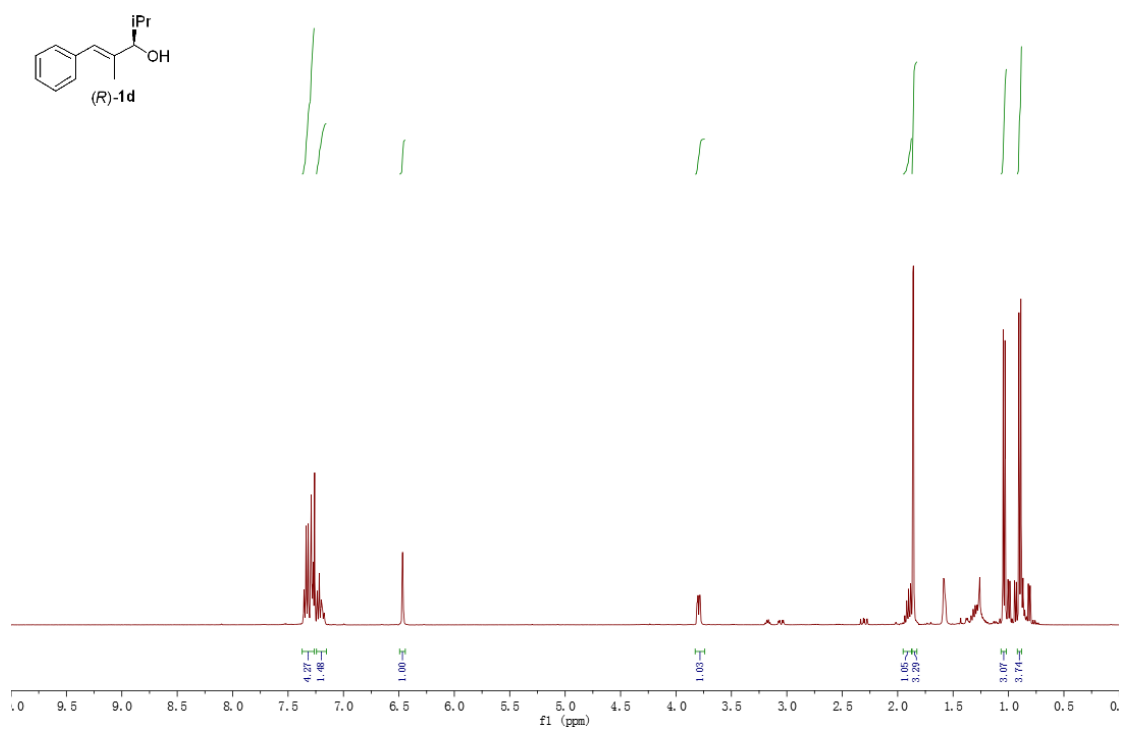

hvu-190221-203-64c4smr. 10. fid

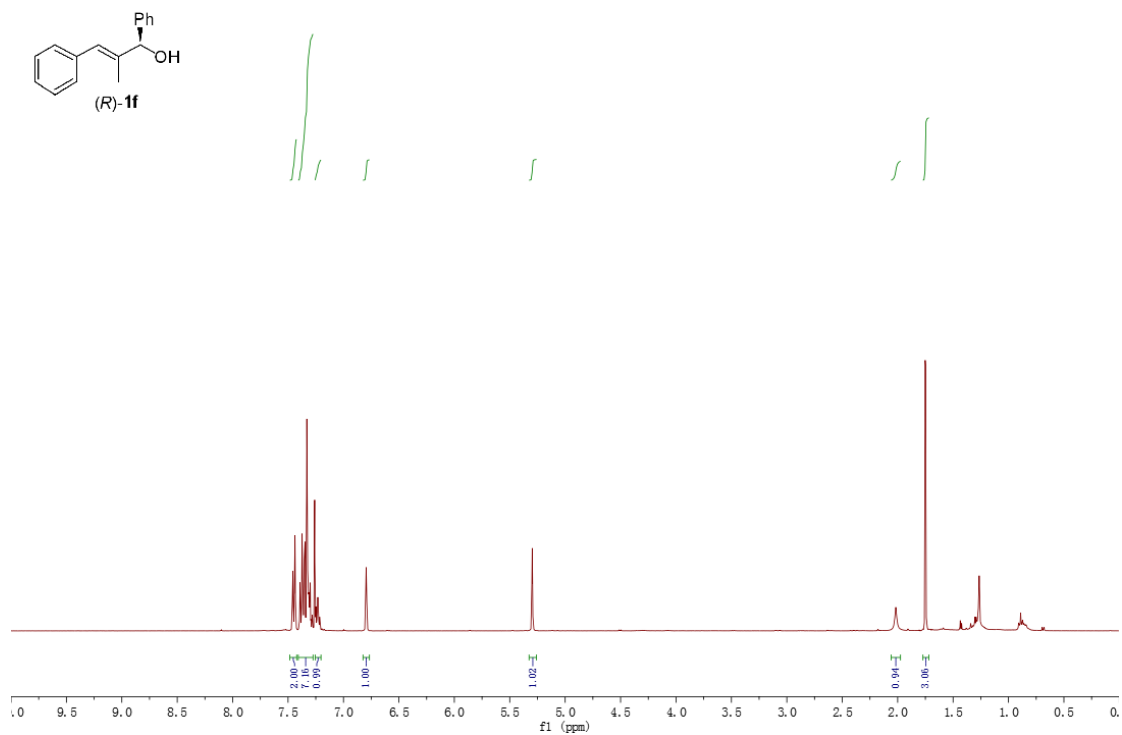

hwu-190201-203-51.csmr. 10. fid

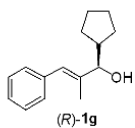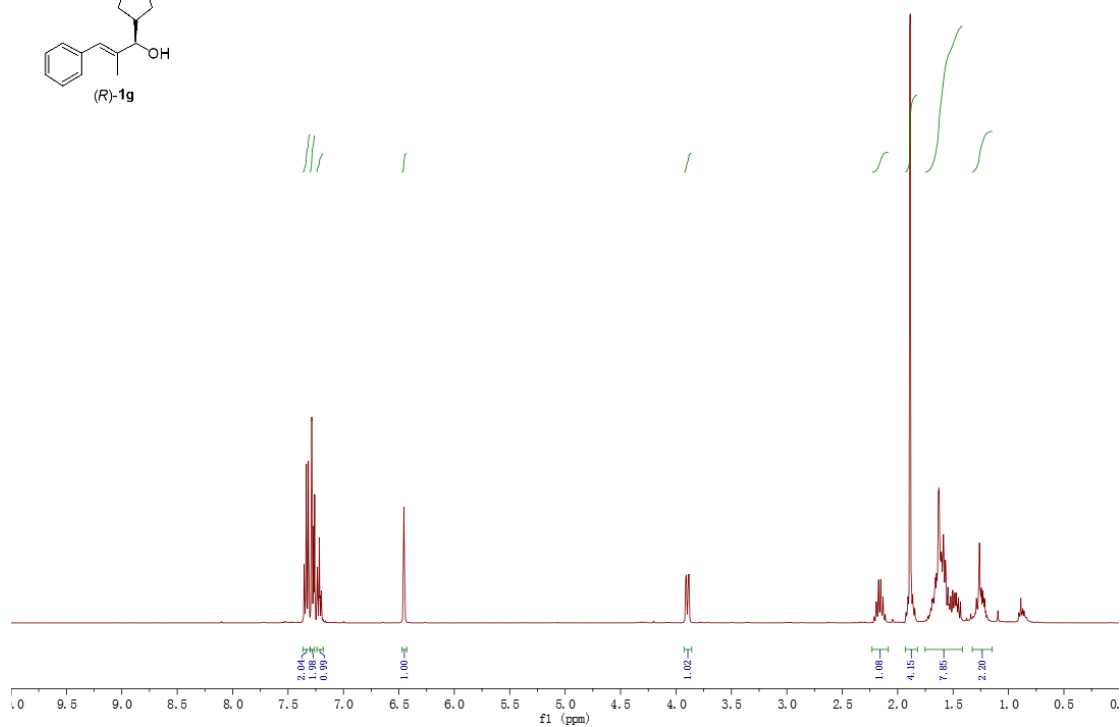

hwu-190205-203-54.csmr. 10. fid

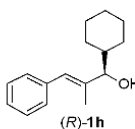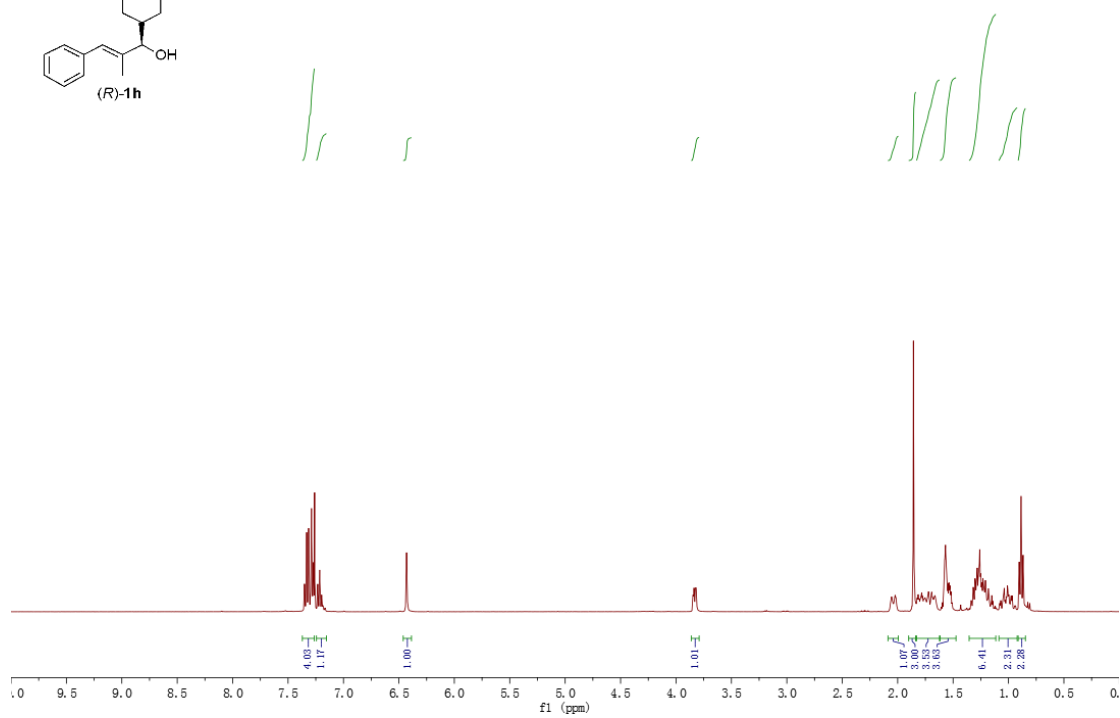



hvu-190201-203-51bsmr. 10. fid

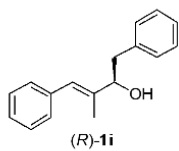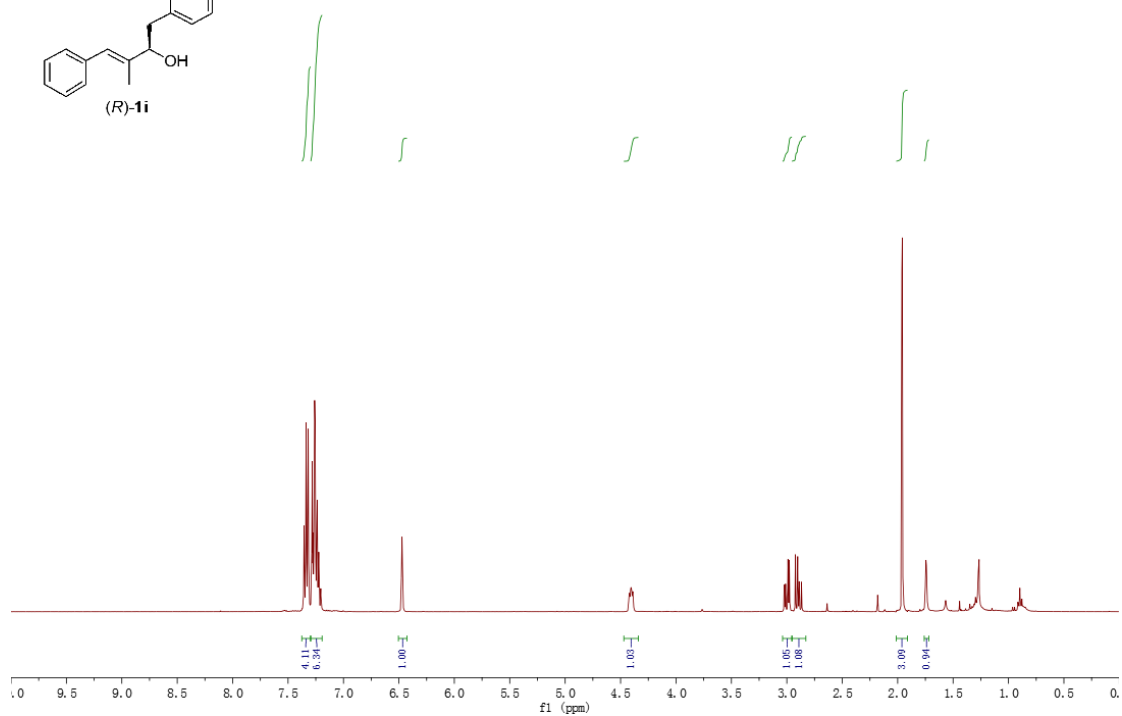

hvu-190221-203-67asmr. 10. fid

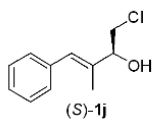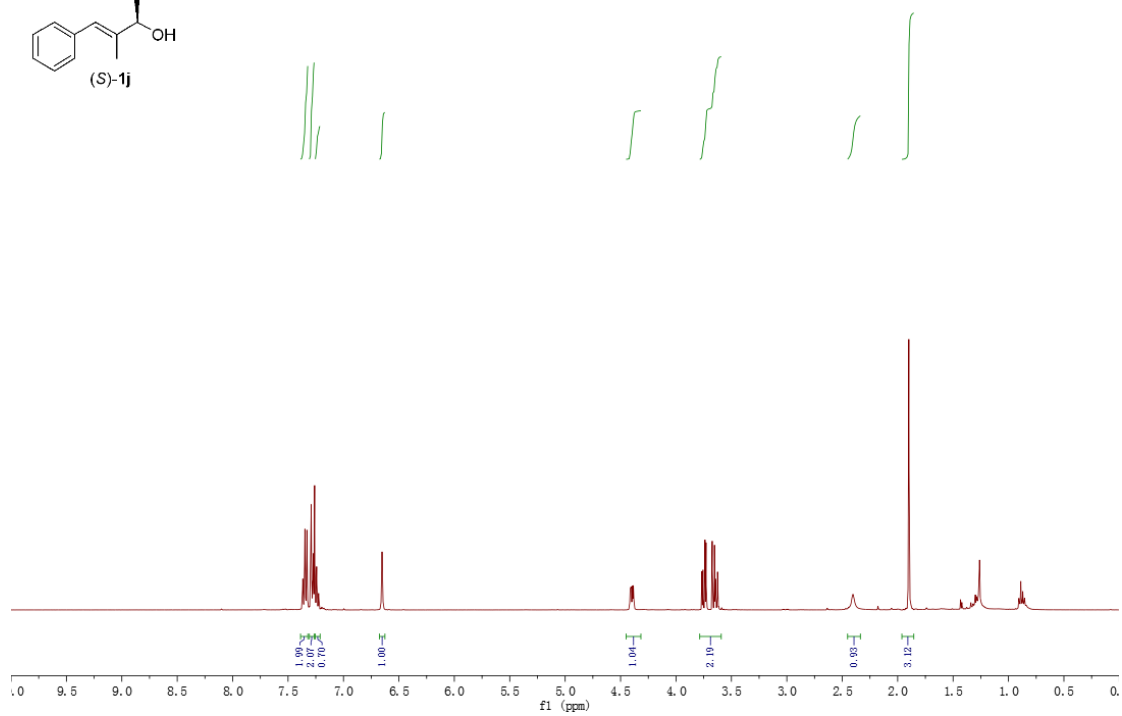

hvu-190210-203-56csmr. 10. fid

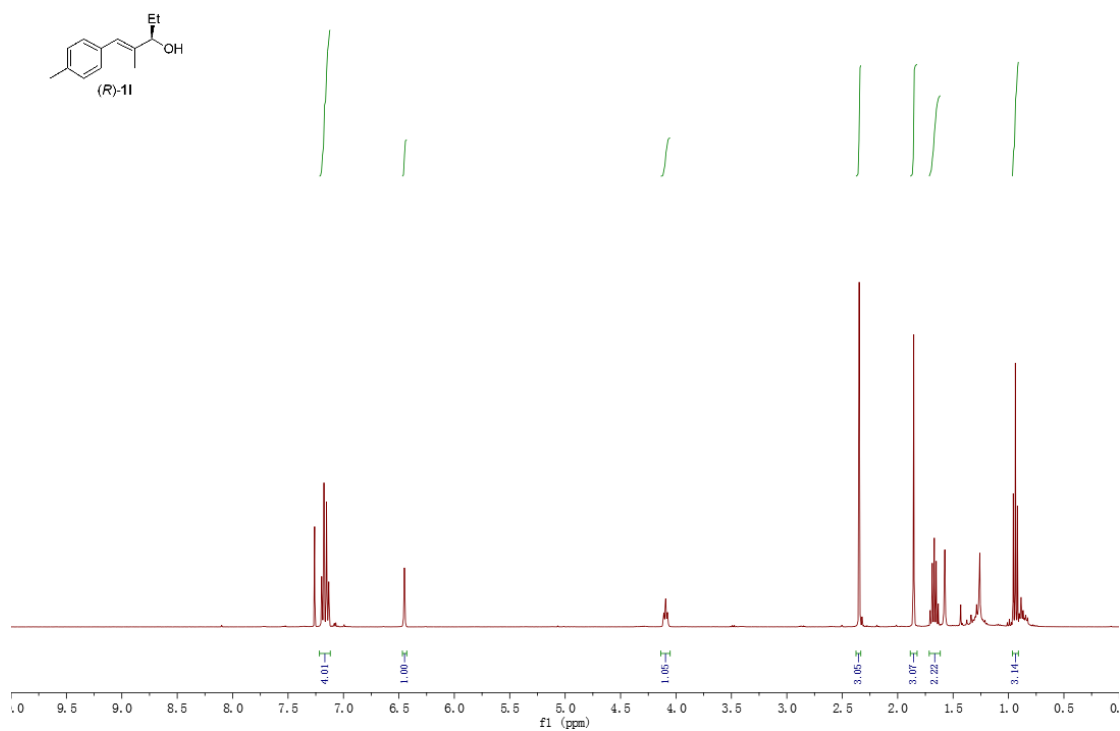

hvu-190130-203-50csmr. 10. fid

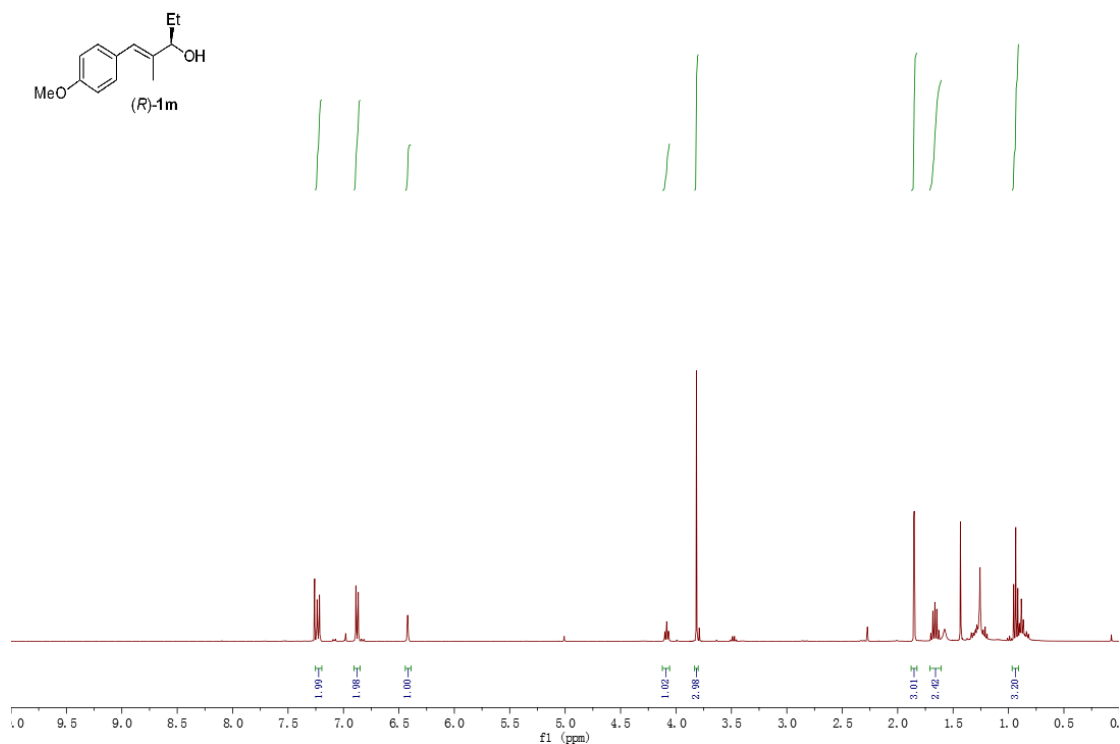

hwu-190211-203-56dsnr. 10. fid

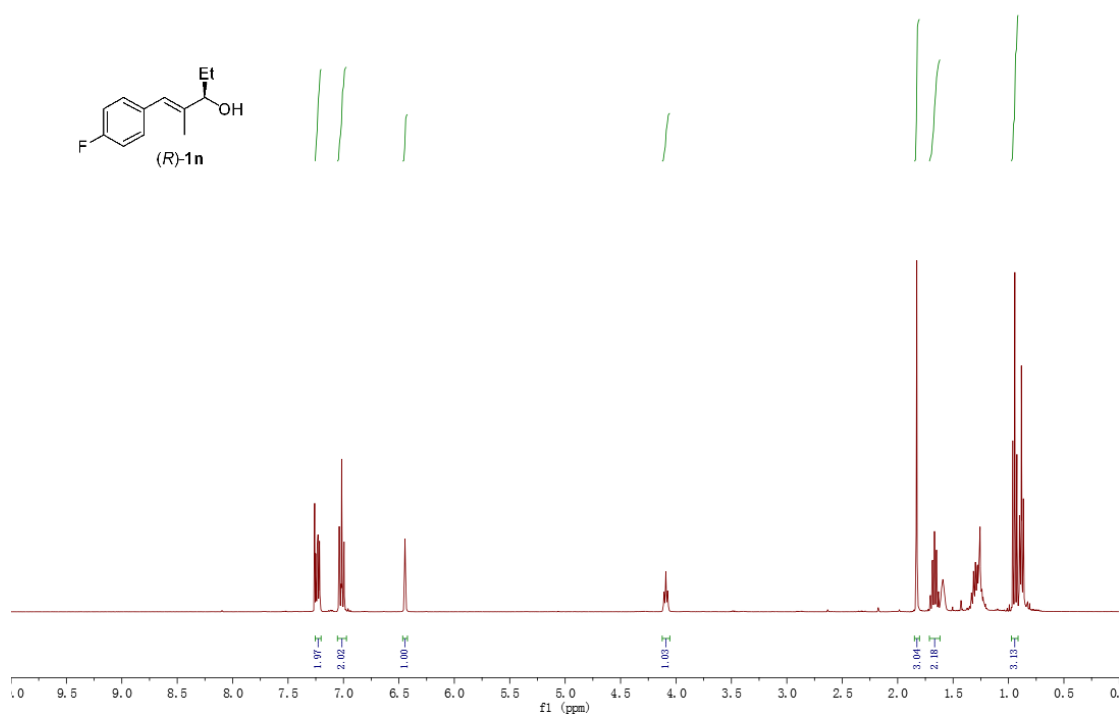

hwu-190211-203-56dsnr. 11. fid

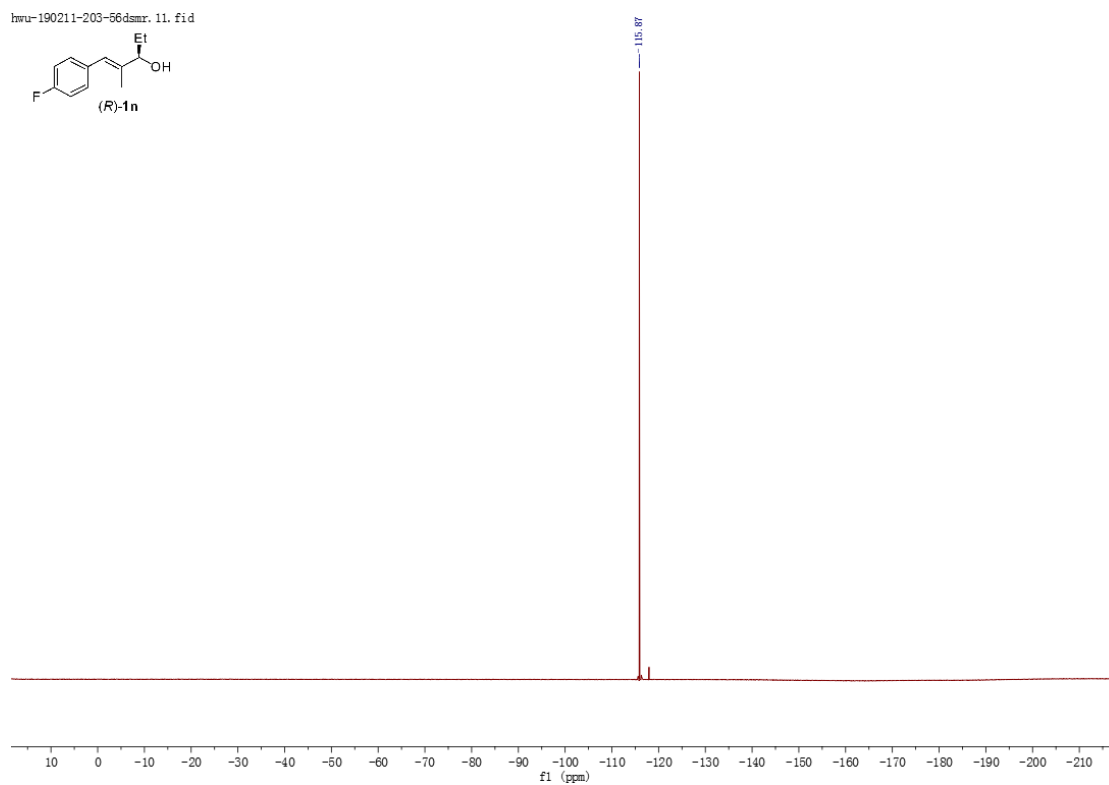

hvu-190404-203-108asmr.10.fid

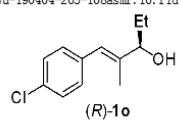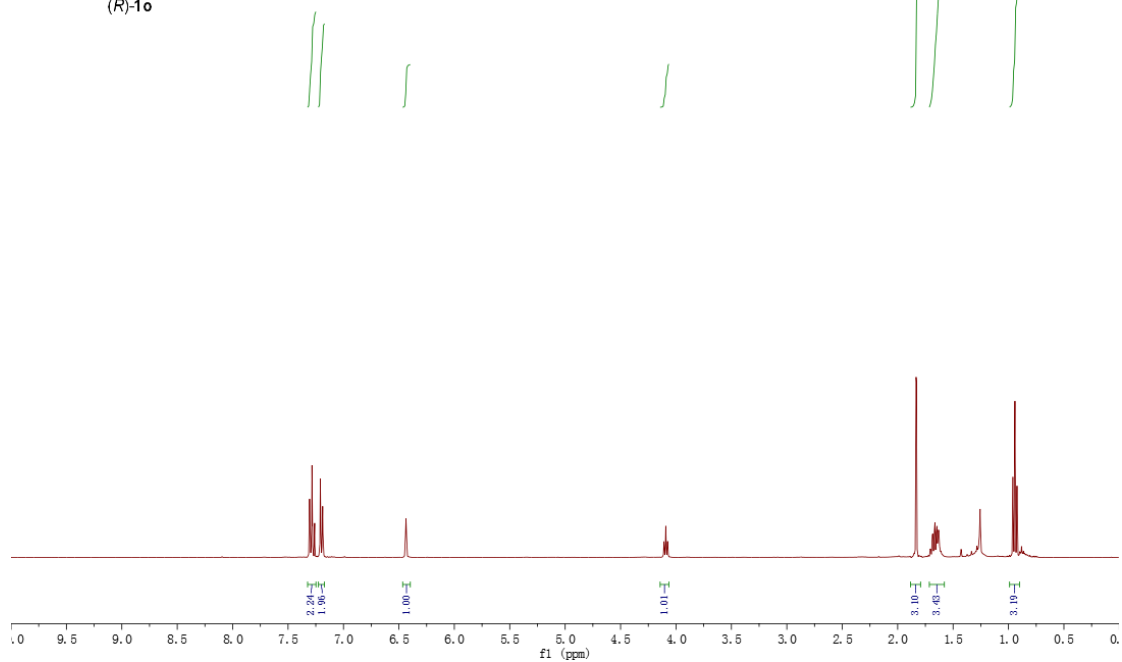

hvu-190130-203-50bsmr.10.fid

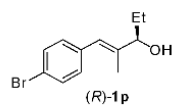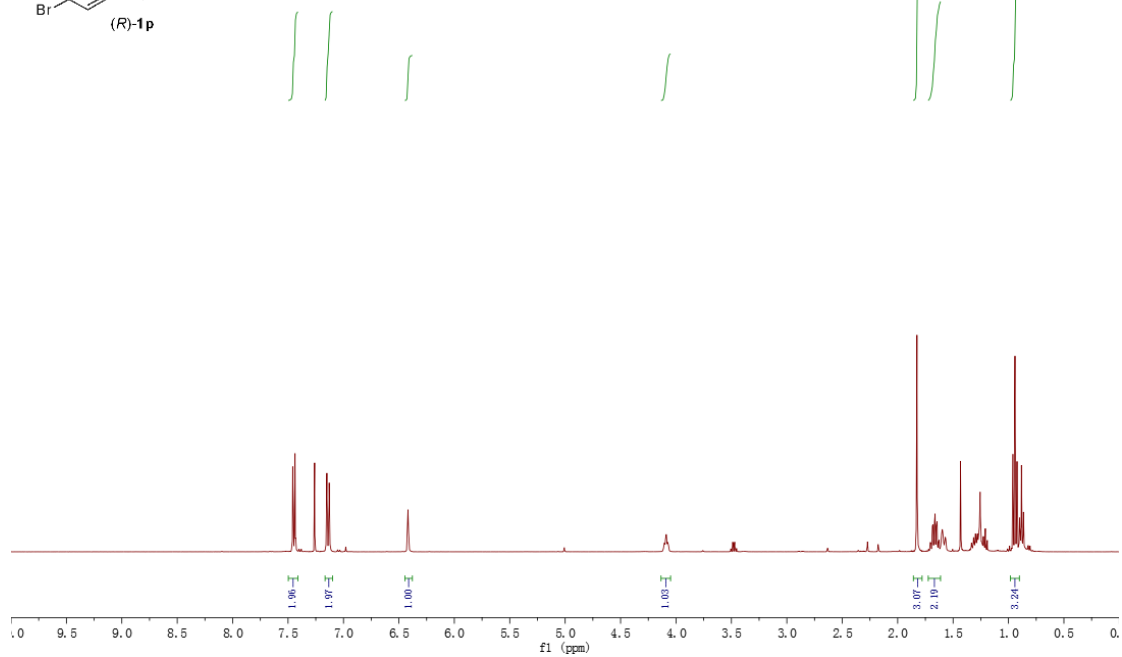

hvu-190130-203-50dsmr. 10. fid

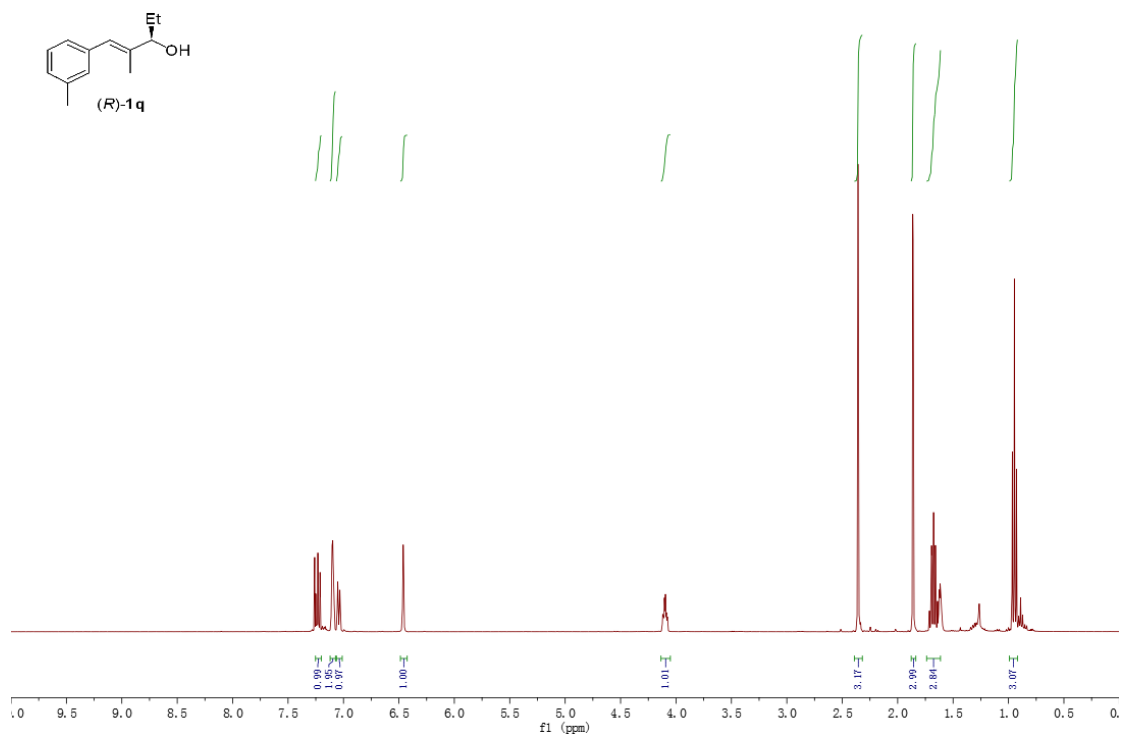

hvu-190306-203-75bsmr. 10. fid

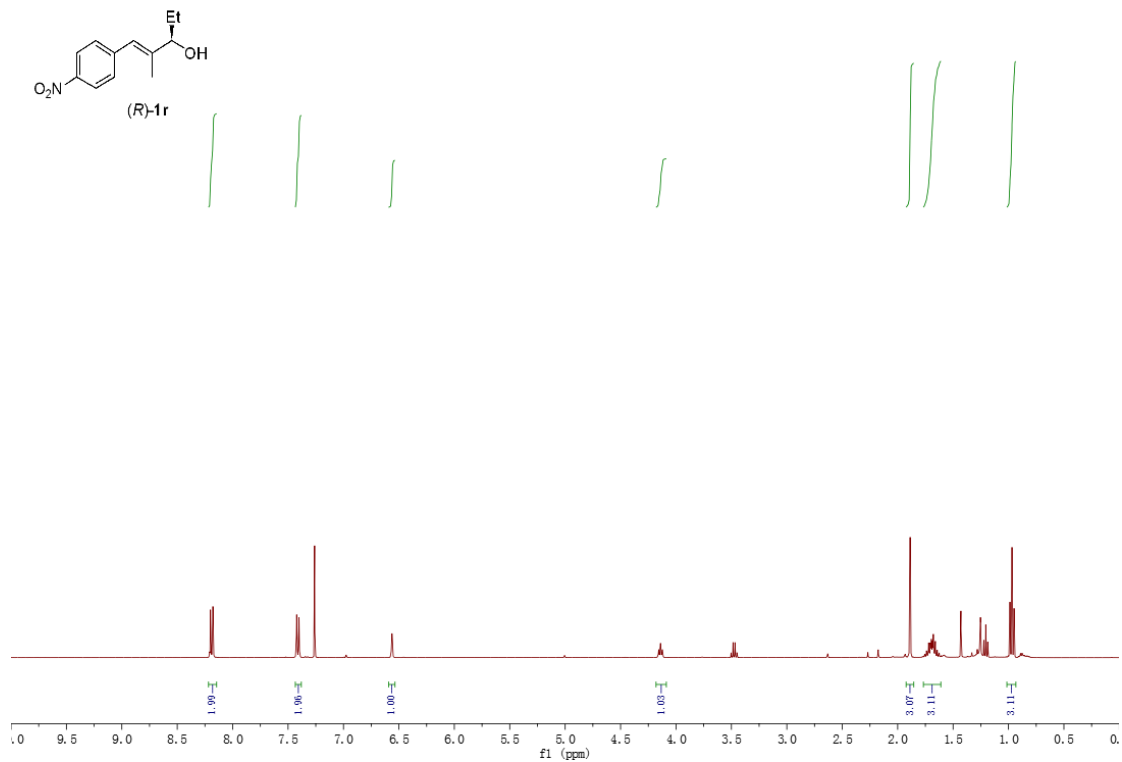

hvu-190224-203-69asmr. 10. fid

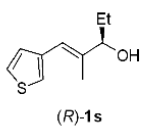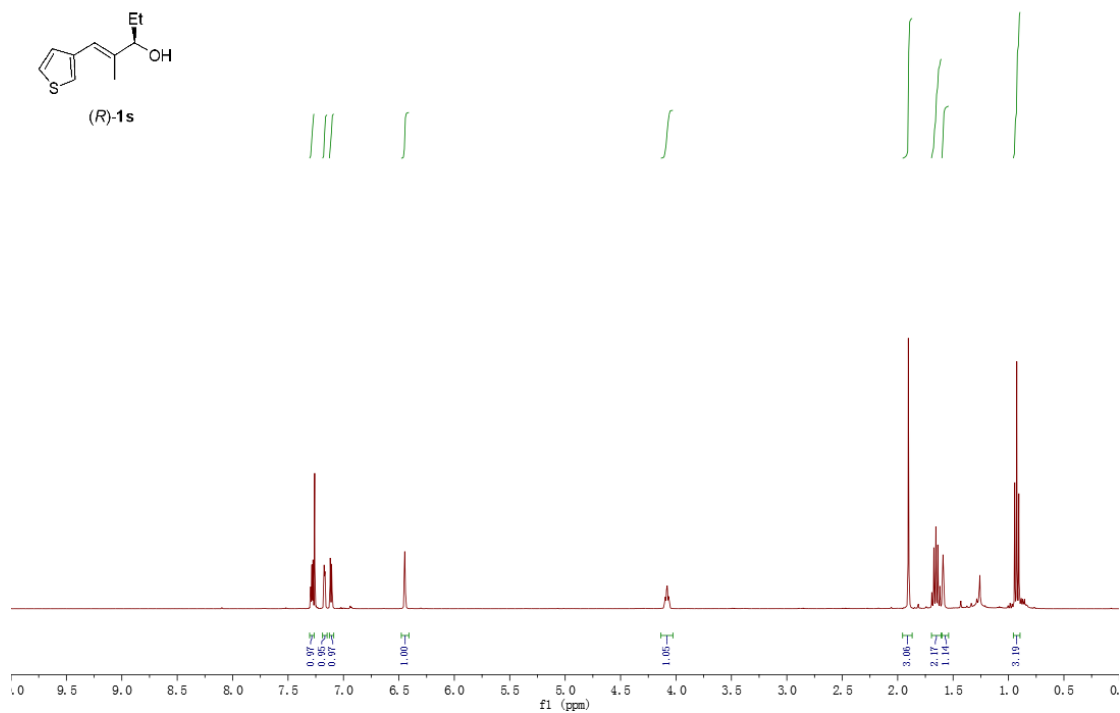

hvu-190214-203-59bsmr. 10. fid

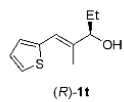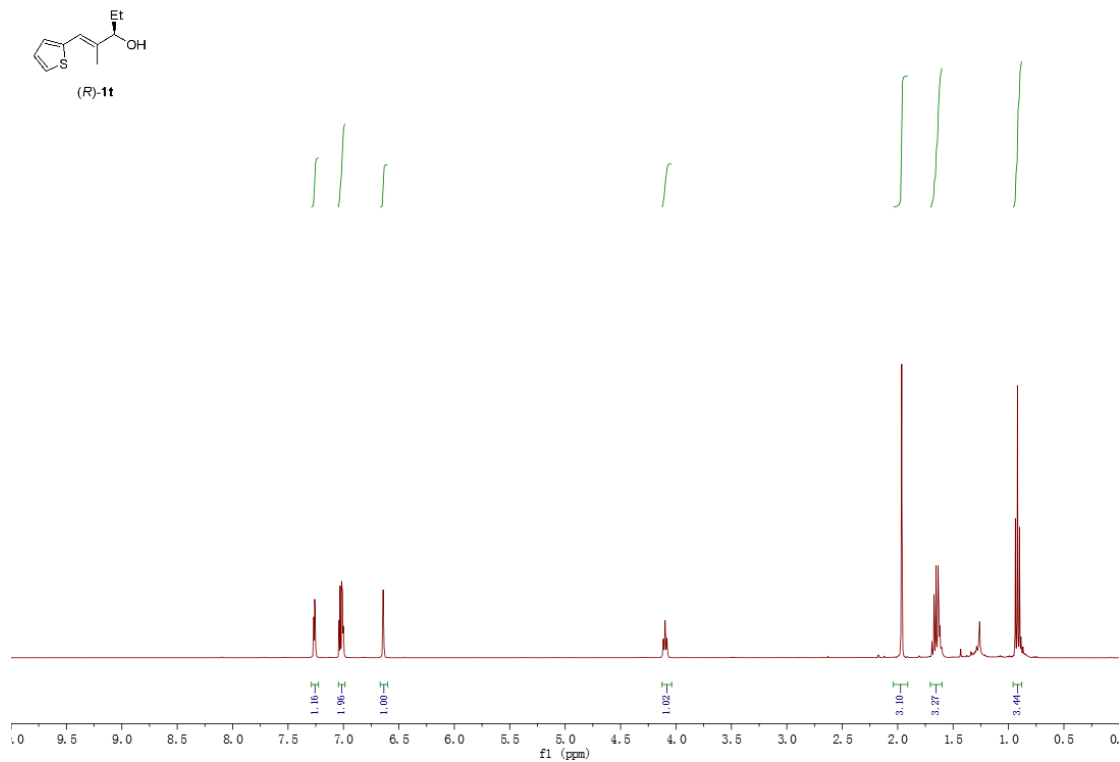

hwu-190219-203-64.dsmr, 10. fid

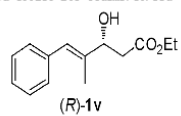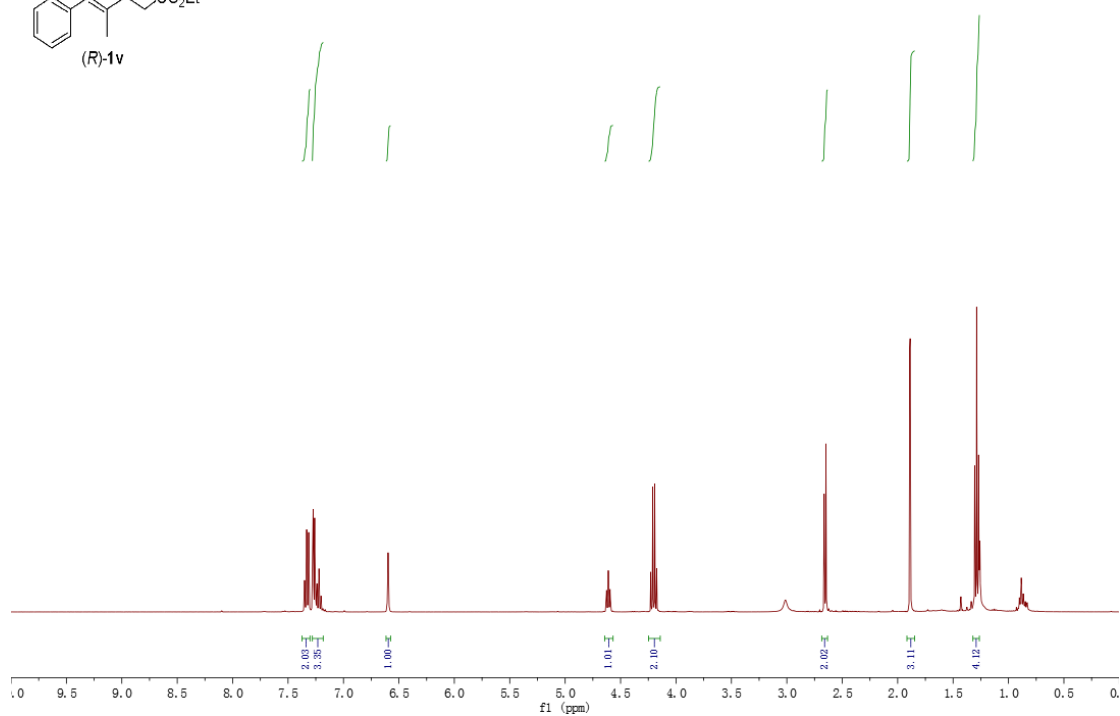

hwu-190306-203-79.dsmr, 10. fid

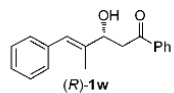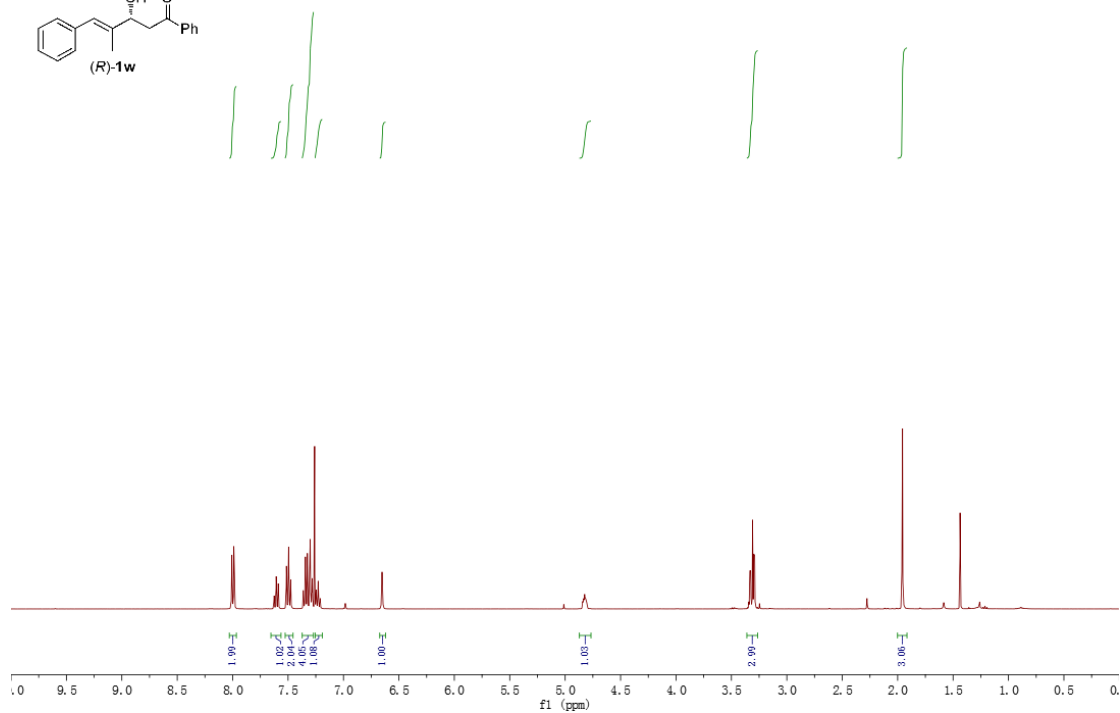

hwu-190405-203-110a2smr. 10. fid

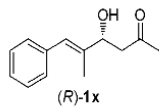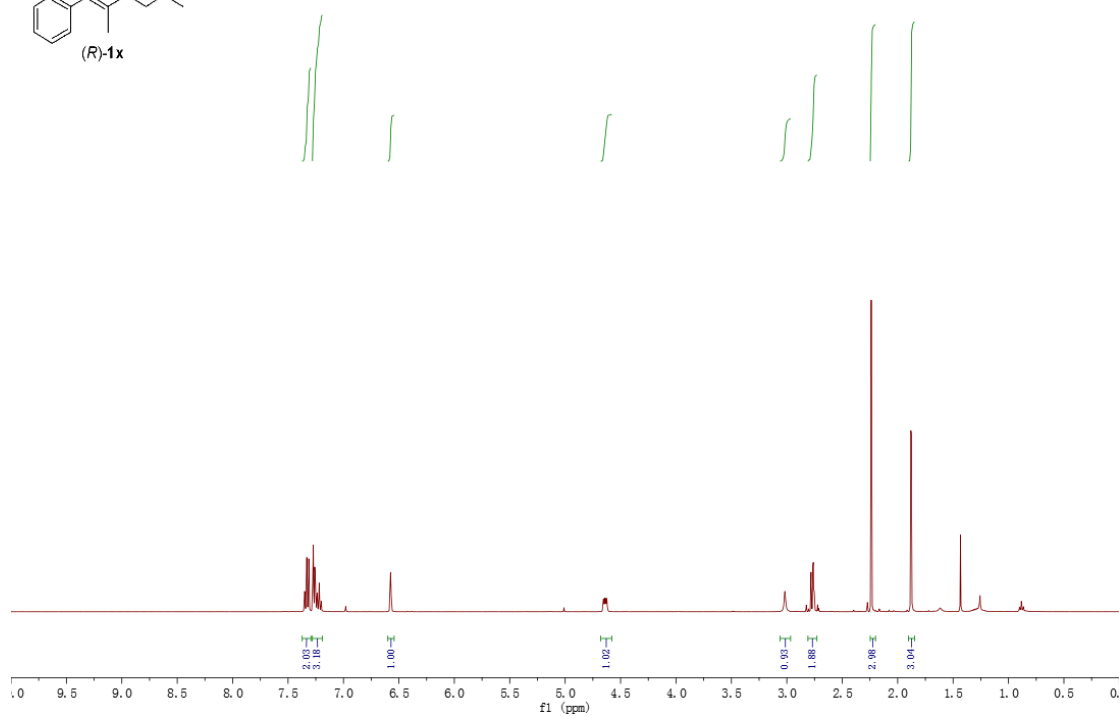

hwu-190224-203-68csmr. 10. fid

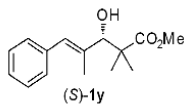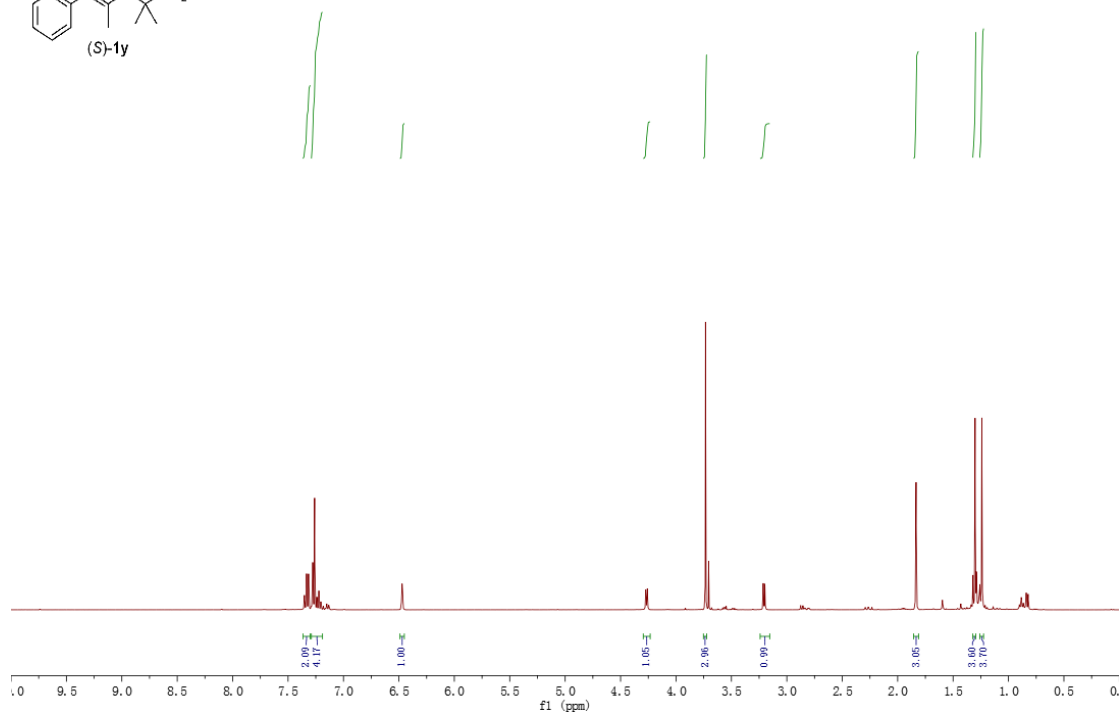



hvu-190305-203-79dsmr. 10. fid

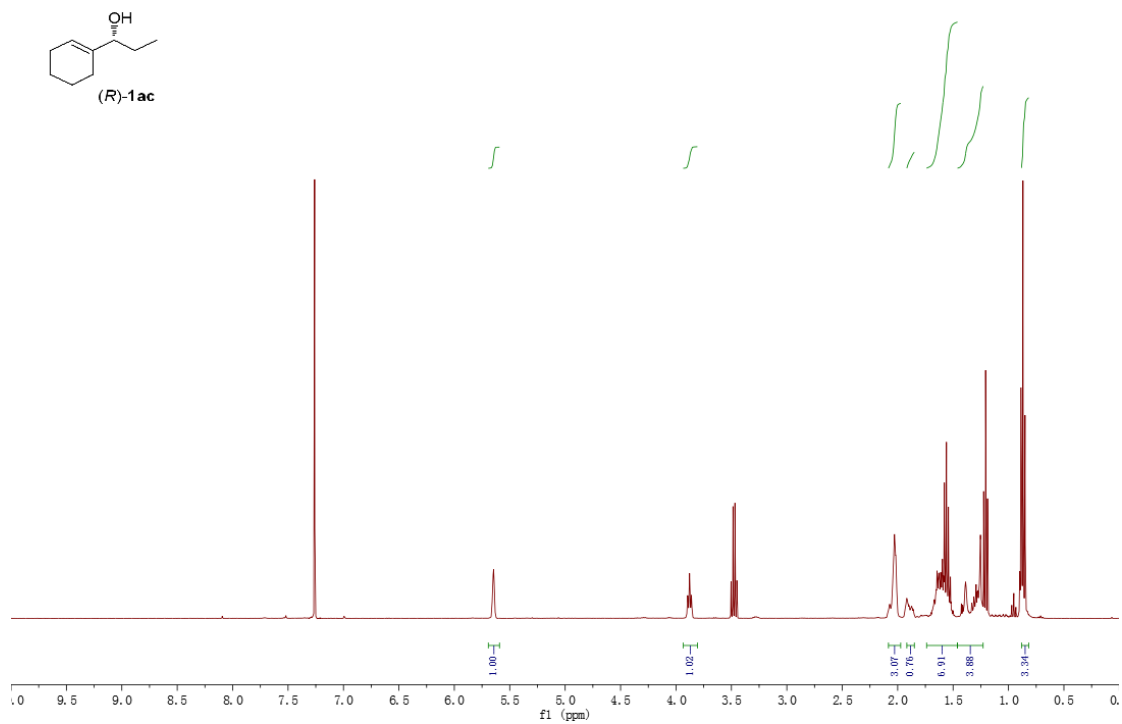

hvu-190324-203-100asmr. 10. fid

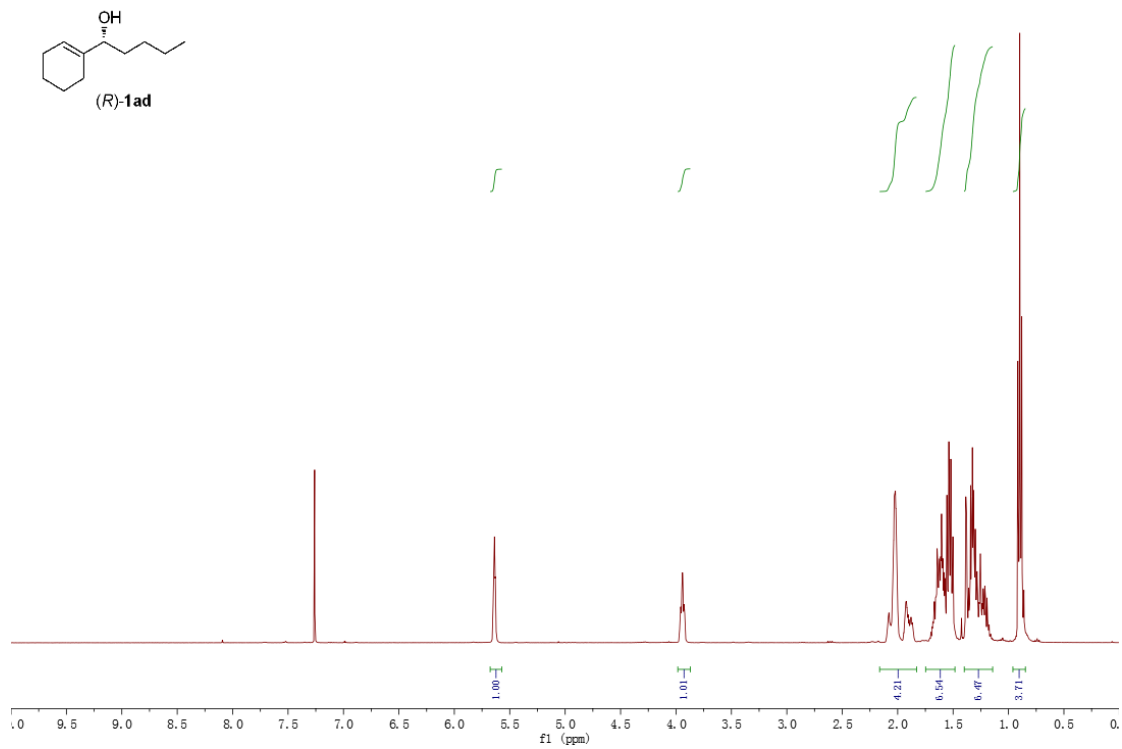

wu03-84a3smr.1.fid

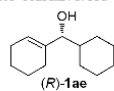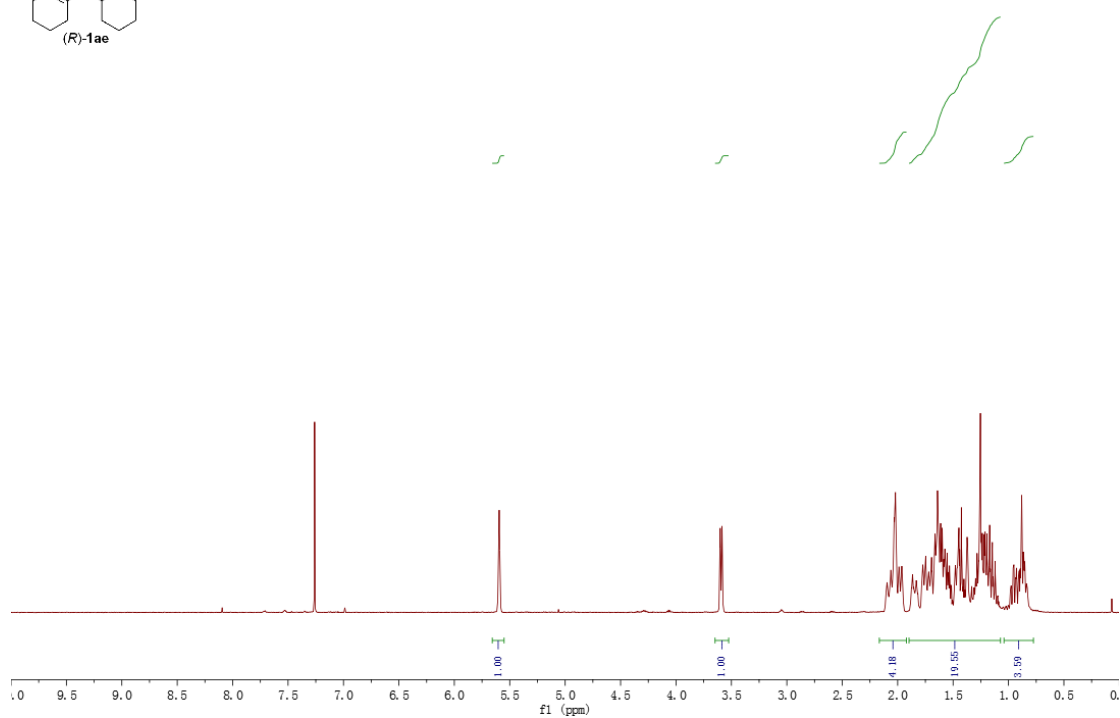

hmvu-201108-205-136d2smr.10.fid

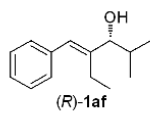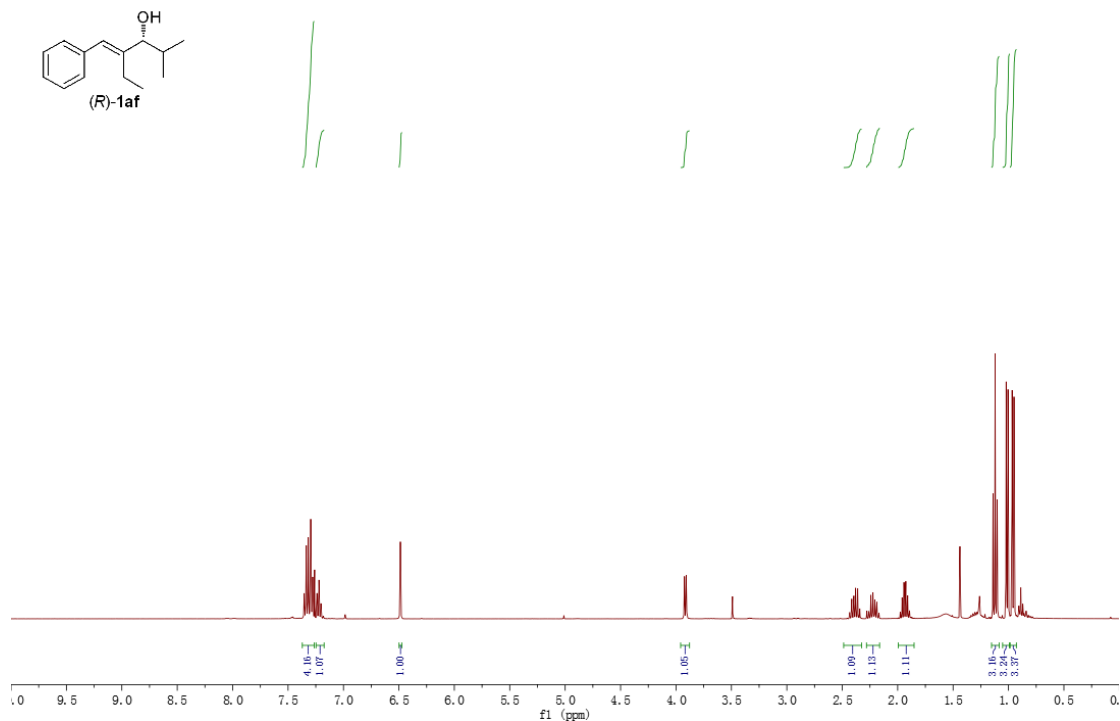

hwu-201108-205-148smr. 10. fid

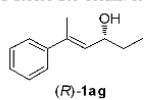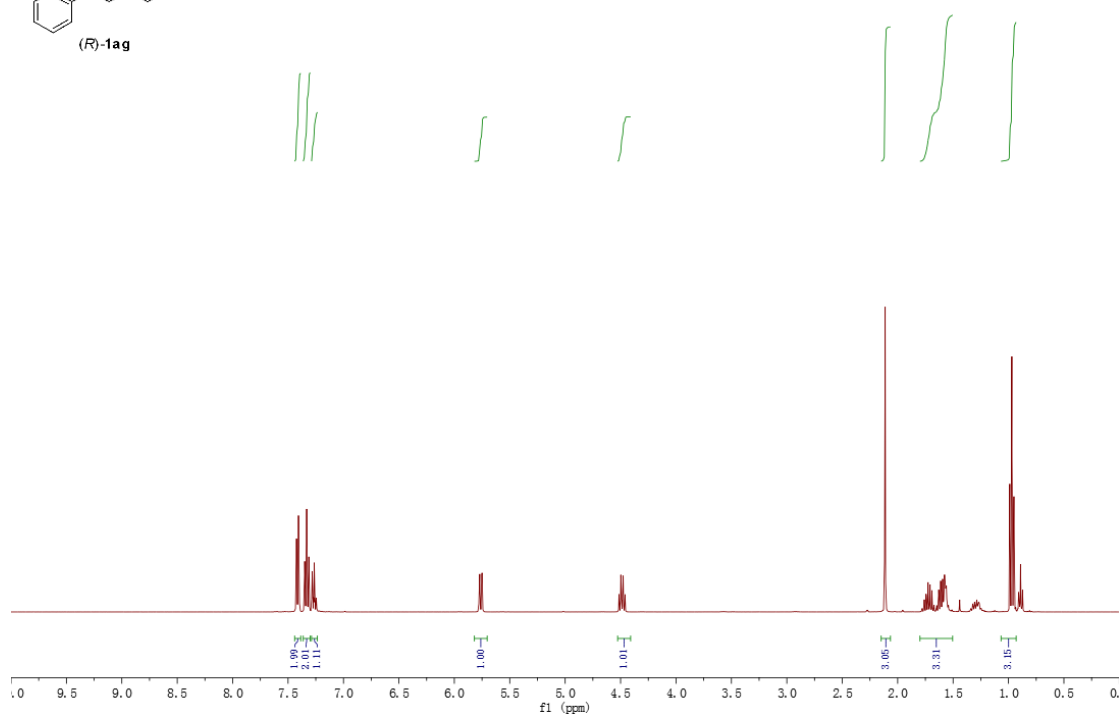

hwu-201108-205-147dsmr. 10. fid

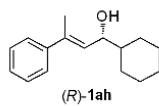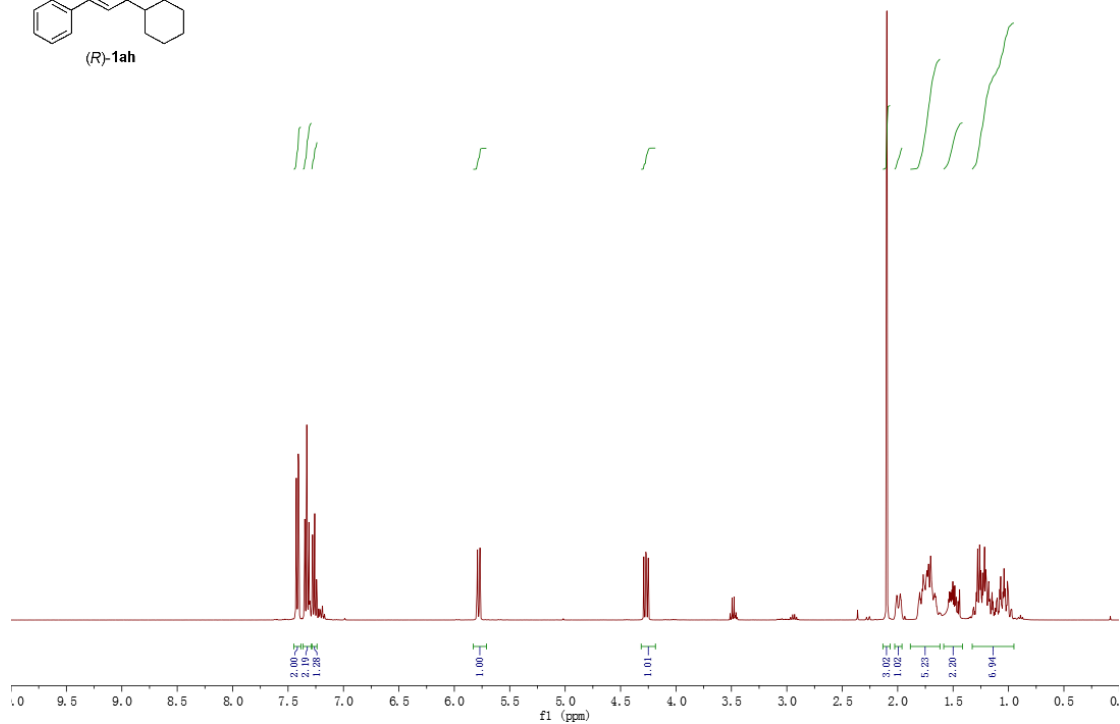

hvu-201108-205-147bsmr.10.fid

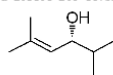

(R)-1ai

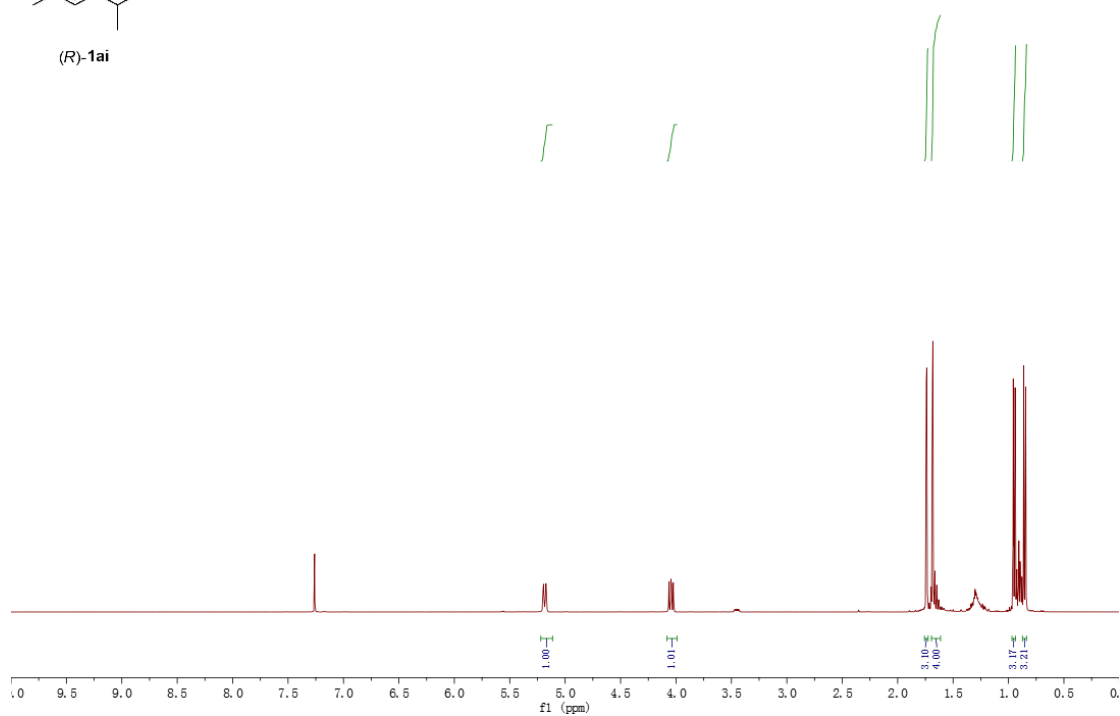

hvu-201108-205-147asmr.10.fid

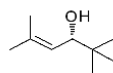

(R)-1aj

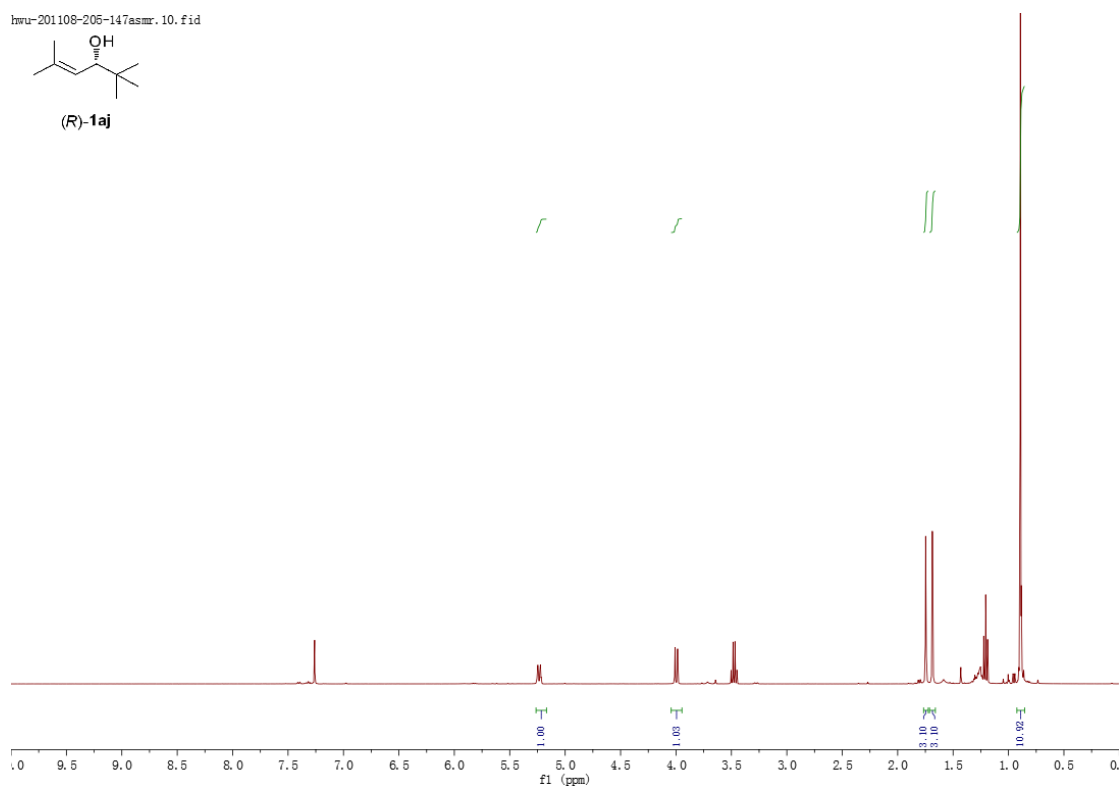

hvu-201106-205-149smr. 10. fid

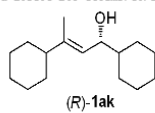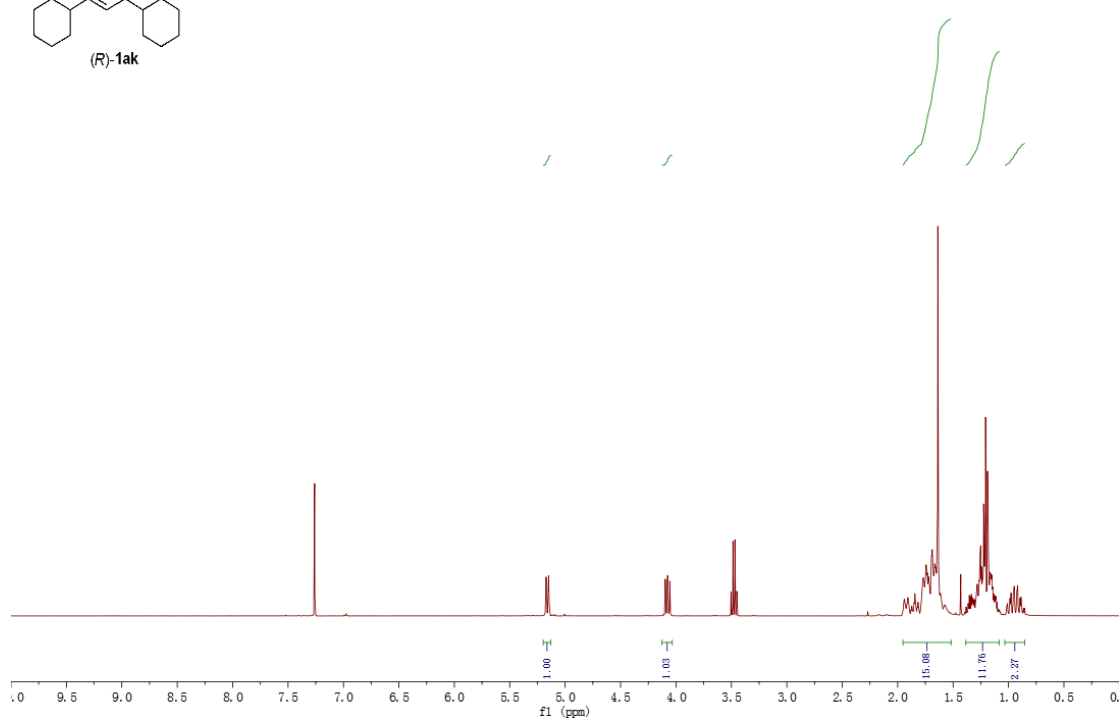

## 9. References

- 1) Liu, Z.-Q.; Sun, L.; Wang, J.-G.; Han, J.; Zhao, Y.-K.; Zhou, B. *Org. Lett.* **2009**, 11, 1437.
- 2) Sudhakar, G.; Raghavaiah, J.; Mahesh, G.; Singarapu, K. K. *Org. Biomol. Chem.* **2016**, 14, 2866.
- 3) Miller, K. M.; Huang, W.-S.; Jamison, T. F. *J. Am. Chem. Soc.* **2003**, 125, 3442.
- 4) Ohashi, M.; Saijo, H.; Arai, T.; Ogoshi, S. *Organometallics* **2010**, 29, 6534.
- 5) Liu, J.; Krajangsri, S.; Yang, J.; Li, J.-Q.; Andersson, P. G. *Nat. Catal.* **2018**, 1, 438.
- 6) Downey, C. W.; Johnson, M. W. *Tetrahedron Lett.* **2007**, 48, 3559.
- 7) Abate, A.; Brenna, E.; Costantini, A.; Fuganti, C.; Gatti, F. G.; Malpezzi, L.; Serra, S. *J. Org. Chem.* **2006**, 71, 5228.
- 8) Balcells, S.; Haughey, M. B.; Walker, J. C. L.; Josa-Culleró, L.; Towers, C.; Donohoe, T. J. *Org. Lett.* **2018**, 20, 3583.
- 9) Hatano, M.; Mizuno, T.; Ishihara, K. *Chem. Commun.* **2010**, 46, 5443.
- 10) Lautens, M.; Maddess, M. L.; Sauer, E. L. O.; Ouellet, S. G. *Org. Lett.* **2002**, 4, 83.
- 11) Birman, V. B.; Jiang, H. *Org. Lett.* **2005**, 7, 3445.
- 12) Infante, R.; Hernández, Y.; Nieto, J.; Andrés, C. *Eur. J. Org. Chem.* **2013**, 2013, 4863.
- 13) Pisani, L.; Superchi, S.; D'Elia, A.; Scafato, P.; Rosini, C. *Tetrahedron* **2012**, 68, 5779.
- 14) Enders, D.; Lotter, H. *Angew. Chem.* **1981**, 93, 831.
- 15) Lin, N.-H.; Overman, L. E.; Rabinowitz, M. H.; Robinson, L. A.; Sharp, M. J.; Zablocki, J. *J. Am. Chem. Soc.* **1996**, 118, 9062.
- 16) Donohoe, T. J.; Johnson, P. D.; Pye, R. J.; Keenan, M. *Org. Lett.* **2004**, 6, 2583.
- 17) Yoshino, M.; Eto, K.; Takahashi, K.; Ishihara, J.; Hatakeyama, S. *Org. Biomol. Chem.* **2012**, 10, 8164.
- 18) Kumar, M.; Bromhead, L.; Anderson, Z.; Overy, A.; Burton, J. W. *Chem. Eur. J.* **2018**, 24, 16753.
- 19) Xiong, P.; Xu, H.-H.; Xu, H.-C. *J. Am. Chem. Soc.* **2017**, 139, 2956.
- 20) Adam, W.; Peters, K.; Peters, E. M.; Stegmann, V. R., *J. Am. Chem. Soc.* **2000**, 122, 2958.
- 21) Infante, R.; Hernández, Y.; Nieto, J.; Andrés, C. *Eur. J. Org. Chem.* **2013**, 22, 4863.
- 22) Yadav, J. S.; Mysorekar, S. V.; Rao, A. V. R. *Tetrahedron* **1989**, 45, 735.
